# Supplementary material for: An Effective Approach for Clustering InhA Molecular Dynamics Trajectory Using Substrate-Binding Cavity Features
Source: PLoS One. 2015 Jul 28;10(7):e0133172. doi: 10.1371/journal.pone.0133172 (PMC4517875; doi:10.1371/journal.pone.0133172)
Supplement: S3 Dataset — (XLS) [file pone.0133172.s003.xls]

## Sheet: Plan1
Cavity Attributes Data Set
RMSD	VOLUME	GLY95	PHE96	MET97	MET102	PHE148	TYR157	MET160	LYS164	MET198	NAD269
0.252431	0.29896	0.666667	0.363636	0.666667	0.285714	0.3	0.222222	0.5	0.666667	0.5	0.555556
0.183737	0.286981	0.666667	0.454545	0.666667	0.285714	0.3	0.222222	0.5	0.5	0.5	0.666667
0.133699	0.306759	1	0.454545	0.666667	0.285714	0.3	0.222222	0.333333	0.5	0.333333	0.888889
0.107292	0.27852	1	0.454545	0.666667	0.285714	0.2	0.222222	0.666667	0.666667	0.5	0.666667
0.211003	0.287644	1	0.363636	0.666667	0.285714	0.2	0.333333	0.5	0.666667	0.833333	0.666667
0.205008	0.295188	1	0.454545	0.666667	0.285714	0.3	0.222222	0.5	0.666667	0.5	0.666667
0.152421	0.246916	0.666667	0.454545	0.666667	0.285714	0.2	0.222222	0.666667	0.666667	0.5	0.444444
0.237866	0.259914	1	0.454545	0.666667	0.285714	0.2	0.222222	0.666667	0.5	0.5	0.666667
0.175529	0.272352	0.666667	0.454545	0.666667	0.285714	0.2	0.222222	0.5	0.666667	0.833333	0.666667
0.241849	0.277041	0.666667	0.454545	0.666667	0.285714	0.3	0.222222	0.666667	0.666667	0.5	0.666667
0.238483	0.257672	1	0.454545	0.666667	0.285714	0.1	0.111111	0.333333	0.5	0.5	0.555556
0.164773	0.250076	1	0.454545	0.666667	0.285714	0.6	0.222222	0.333333	0.5	0.833333	0.666667
0.157732	0.28484	0.666667	0.545455	0.666667	0.285714	0.2	0.222222	0.333333	0.333333	0.5	0.666667
0.187063	0.26282	1	0.454545	0.666667	0.285714	0.3	0.222222	0.5	0.5	0.833333	0.666667
0.160535	0.219951	1	0.363636	0.666667	0.285714	0.3	0.222222	0.333333	0.5	0.5	0.666667
0.134276	0.292181	0.666667	0.363636	0.666667	0.428571	0.2	0.222222	0.5	0.666667	0.5	0.555556
0.168542	0.295851	1	0.454545	0.666667	0.285714	0.1	0.222222	0.5	0.666667	0.5	0.666667
0.169025	0.282649	1	0.454545	0.666667	0.285714	0.2	0.111111	0.333333	0.5	0.5	0.555556
0.228223	0.290804	0.666667	0.454545	0.666667	0.285714	0.2	0.222222	0.666667	0.5	0.833333	0.555556
0.22605	0.252166	0.666667	0.545455	0.666667	0.285714	0.2	0.222222	0.666667	0.5	0.333333	0.555556
0.149833	0.249108	0.666667	0.454545	0.666667	0.285714	0.5	0.222222	0.5	0.5	0.5	0.777778
0.19444	0.28377	1	0.363636	0.666667	0.428571	0.5	0.333333	0.333333	0.5	0.833333	0.666667
0.210775	0.254817	0.666667	0.454545	0.666667	0.285714	0.3	0.222222	0.5	0.666667	0.833333	0.666667
0.258117	0.221837	0.666667	0.363636	0.666667	0.428571	0.2	0.222222	0.333333	0	0.5	0.666667
0.250312	0.23091	1	0.272727	0.666667	0.285714	0.2	0.222222	0.666667	0.5	0.833333	0.666667
0.175959	0.216077	1	0.363636	0.666667	0.285714	0.2	0.222222	0.5	0.5	0.833333	0.555556
0.133525	0.265114	0.666667	0.454545	0.666667	0.285714	0.5	0.222222	0.5	0.5	0.5	0.666667
0.132505	0.301968	1	0.545455	0.666667	0.428571	0.3	0.222222	0.333333	0.5	0.833333	0.666667
0.204713	0.280712	0.666667	0.454545	0.666667	0.428571	0.2	0.222222	0.5	0.666667	0.5	0.666667
0.233588	0.305485	1	0.545455	0.666667	0.428571	0.2	0.222222	0.5	0.5	0.5	0.555556
0.166289	0.228871	1	0.272727	0.666667	0.285714	0.2	0.333333	0.333333	0.333333	0.5	0.666667
0.273648	0.223927	0.666667	0.363636	0.666667	0.285714	0.2	0.333333	0.333333	0.333333	0.5	0.555556
0.225098	0.330615	0.666667	0.545455	0.666667	0.285714	0.2	0.222222	0.333333	0.666667	0.5	0.666667
0.181457	0.268325	1	0.363636	0.666667	0.428571	0.3	0.222222	0.5	0.333333	0.833333	0.666667
0.207301	0.35814	1	0.454545	0.833333	0.428571	0.1	0.222222	0.333333	0.333333	0.5	0.555556
0.164948	0.252574	0.666667	0.272727	0.666667	0.285714	0.2	0.222222	0.833333	0.5	0.833333	0.555556
0.160321	0.278571	0.666667	0.454545	0.666667	0.285714	0.2	0.333333	0.5	0.5	0.833333	0.666667
0	0.296768	1	0.454545	0.5	0.571429	0.3	0.222222	0.333333	0.5	0.5	0.666667
0.017569	0.321745	0.666667	0.363636	0.666667	0.285714	0	0.555556	0.333333	0.5	0.666667	0.555556
0.04981	0.264961	0.666667	0.363636	0.666667	0.428571	0.1	0.222222	0.5	0.333333	0.5	0.666667
0.13728	0.28117	1	0.545455	0.666667	0.428571	0	0.222222	0.666667	0.5	0.5	0.666667
0.233333	0.382251	0.666667	0.545455	0.666667	0.714286	0	0.222222	0.5	0	0.5	0.666667
0.238228	0.294016	1	0.545455	0.666667	0.428571	0	0.222222	0.5	0.5	0.5	0.555556
0.156579	0.306453	1	0.454545	0.666667	0.285714	0	0.333333	0.666667	0.5	0.5	0.555556
0.154205	0.288358	0.666667	0.454545	0.833333	0.571429	0	0.333333	0.666667	0.5	0.5	0.555556
0.083004	0.246151	0.666667	0.363636	0.666667	0.428571	0.2	0.222222	0.5	0.333333	0.5	0.666667
0.11786	0.305893	1	0.454545	0.666667	0.571429	0.3	0.222222	0.666667	0	0.5	0.666667
0.114963	0.289887	1	0.181818	0.833333	0.428571	0.5	0.222222	0.5	0.333333	0.5	0.888889
0.145206	0.281068	0.666667	0.363636	0.666667	0.571429	0.2	0.222222	0.666667	0.5	0.5	0.888889
0.167804	0.271995	0.666667	0.454545	0.666667	0.428571	0	0.222222	0.666667	0.5	0.5	0.555556
0.178855	0.327301	1	0.363636	0.666667	0.571429	0.1	0.333333	0.5	0.5	0.833333	0.666667
0.126524	0.321694	0.666667	0.454545	0.833333	0.571429	0.1	0.333333	0.5	0.5	0.5	0.666667
0.143463	0.374299	1	0.363636	0.833333	0.428571	0	0.333333	0.5	0.333333	0.5	0.555556
0.053337	0.338465	0.666667	0.545455	0.666667	0.428571	0.2	0.333333	0.5	0.5	0.5	0.555556
0.054558	0.303599	1	0.363636	0.666667	0.571429	0	0.222222	0.666667	0.5	0.5	0.666667
0.055108	0.349526	1	0.454545	0.666667	0.285714	0.1	0.333333	0.5	0.5	0.833333	0.666667
0.112388	0.258283	0.666667	0.363636	0.666667	0.428571	0.3	0.222222	0.333333	0.166667	0.5	0.666667
0.134973	0.340504	1	0.454545	0.833333	0.428571	0	0.333333	0.5	0.333333	0.5	0.555556
0.148975	0.285095	1	0.272727	0.833333	0.428571	0	0.111111	0.5	0.5	0.5	0.444444
0.098172	0.344276	1	0.545455	0.833333	0.285714	0	0.222222	0.5	0.5	0.333333	0.666667
0.204458	0.311704	1	0.181818	0.833333	0.428571	0	0.222222	0.666667	0.5	0.5	0.666667
0.13905	0.398206	1	0.454545	0.833333	0.428571	0.1	0.222222	0.5	0.5	0.833333	0.666667
0.242587	0.302273	0.666667	0.272727	0.833333	0.571429	0.2	0.222222	0.5	0.5	0.833333	0.666667
0.229149	0.360434	1	0.454545	0.833333	0.571429	0.2	0.111111	0.666667	0.5	0.5	0.444444
0.230972	0.353655	1	0.545455	0.833333	0.571429	0	0.111111	0.5	0.5	0.5	0.666667
0.192294	0.28326	1	0.454545	0.833333	0.428571	0	0.111111	0.666667	0	0.333333	0.444444
0.19786	0.341217	0.666667	0.454545	0.833333	0.428571	0	0.111111	0.5	0.333333	0.5	0.444444
0.208978	0.404017	1	0.454545	0.833333	0.428571	0	0.111111	0.666667	0.5	0.5	0.555556
0.233051	0.356203	0.666667	0.454545	0.833333	0.571429	0.2	0.333333	0.666667	0.5	0.5	0.555556
0.198624	0.620043	1	0.545455	0.833333	0.428571	0.2	0.222222	0.666667	0.5	1	0.666667
0.227888	0.399582	1	0.454545	0.833333	0.428571	0.2	0.222222	0.5	0.333333	0.5	0.555556
0.191435	0.353451	1	0.454545	0.833333	0.428571	0.1	0.222222	0.5	0.5	0.5	0.666667
0.279455	0.322306	1	0.454545	0.833333	0.285714	0.2	0.222222	0.666667	0.333333	0.5	0.666667
0.20647	0.376083	1	0.545455	0.833333	0.428571	0.1	0.333333	0.5	0.5	0.833333	0.666667
0.181645	0.48899	1	0.545455	0.833333	0.428571	0.4	0.333333	0.666667	0.333333	0.5	0.666667
0.260612	0.334387	0.666667	0.454545	0.833333	0.428571	0.2	0.222222	0.666667	0.5	0.833333	0.555556
0.228505	0.34086	1	0.454545	0.666667	0.428571	0.5	0.222222	0.666667	0.5	0.833333	0.666667
0.248233	0.355031	0.666667	0.454545	0.833333	0.714286	0.2	0.222222	0.5	0.5	0.5	0.666667
0.169172	0.250994	1	0.272727	0.5	0.285714	0.3	0.222222	0.833333	0.5	0.5	0.666667
0.281789	0.292334	1	0.454545	0.666667	0.285714	0.4	0.222222	0.666667	0.5	0.333333	0.666667
0.200193	0.313539	0.666667	0.545455	0.666667	0.428571	0.3	0.222222	0.666667	0.5	0.5	0.666667
0.294355	0.297278	1	0.454545	0.833333	0.428571	0	0.111111	0.666667	0.5	0.5	0.444444
0.245336	0.231675	1	0.272727	0.666667	0.428571	0	0.111111	0.666667	0.5	0.5	0.444444
0.128562	0.354266	0.666667	0.454545	0.666667	0.285714	0	0.111111	0.5	0.5	0.5	0.666667
0.124874	0.348201	0.666667	0.545455	0.833333	0.428571	0	0.444444	0.833333	0.5	0.5	0.444444
0.204713	0.298094	0.666667	0.181818	0.833333	0.428571	0.2	0.222222	0.5	0.5	0.833333	0.666667
0.190979	0.388572	0.666667	0.454545	0.833333	0.428571	0.1	0.222222	0.666667	0.5	0.5	0.666667
0.175261	0.394994	1	0.454545	0.833333	0.428571	0.3	0.222222	0.333333	0.5	0.5	0.666667
0.294087	0.320369	1	0.454545	0.833333	0.428571	0	0.111111	0.666667	0.5	0.5	0.333333
0.247978	0.441125	1	0.454545	0.833333	0.428571	0.2	0.222222	0.666667	0.666667	0.5	0.666667
0.188927	0.2618	1	0.272727	0.833333	0.428571	0.1	0.222222	0.666667	0.5	0.833333	0.666667
0.262409	0.278622	0.666667	0.272727	0.666667	0.285714	0.3	0.222222	0.666667	0.666667	0.5	0.666667
0.205947	0.367316	1	0.363636	0.833333	0.571429	0.1	0.333333	0.666667	0.5	0.5	0.666667
0.181954	0.307524	1	0.363636	0.833333	0.571429	0	0.222222	0.666667	0.5	0.5	0.555556
0.247361	0.262361	0.666667	0.272727	0.833333	0.428571	0.1	0.333333	0.5	0.833333	0.5	0.666667
0.356718	0.277806	1	0.272727	0.5	0.285714	0.1	0.222222	0.666667	0.5	0.666667	0.666667
0.389107	0.265063	1	0.272727	0.5	0.285714	0.4	0.222222	0.833333	0.666667	0.5	0.666667
0.393667	0.246916	1	0.272727	0.5	0.285714	0.1	0.222222	0.666667	0.5	0.333333	0.666667
0.262597	0.332807	1	0.454545	0.666667	0.428571	0.1	0.222222	0.5	0.833333	0.5	0.666667
0.234473	0.307014	1	0.363636	0.666667	0.285714	0.2	0.222222	0.666667	0.666667	0.5	0.666667
0.167348	0.330564	1	0.363636	0.833333	0.571429	0.2	0.222222	0.333333	0.5	0.833333	0.666667
0.291981	0.229789	1	0.272727	0.666667	0.428571	0	0.222222	0.5	0.5	0.5	0.555556
0.249842	0.269141	1	0.363636	0.833333	0.571429	0	0.222222	0.333333	0.5	0.5	0.444444
0.224602	0.32725	1	0.454545	0.666667	0.428571	0.1	0.222222	0.666667	0.666667	0.833333	0.666667
0.231992	0.340453	1	0.454545	0.833333	0.714286	0	0.222222	0.5	0.5	0.5	0.555556
0.275257	0.283107	0.666667	0.545455	0.833333	0.428571	0.4	0.222222	0.5	0.5	0.5	0.555556
0.288467	0.314252	1	0.545455	0.833333	0.714286	0.1	0.222222	0.5	0.5	0.5	0.666667
0.305822	0.282903	1	0.454545	0.833333	0.571429	0.3	0.222222	0.333333	0.5	0.5	0.555556
0.22648	0.302426	1	0.545455	0.833333	0.714286	0.6	0.222222	0.333333	0.5	0.5	0.555556
0.273916	0.304414	1	0.363636	0.833333	0.714286	0.2	0.222222	0.666667	0.5	0.833333	0.555556
0.23686	0.317871	1	0.545455	0.833333	0.714286	0	0.222222	0.666667	0.5	0.5	0.666667
0.308907	0.342797	1	0.545455	0.833333	0.714286	0.2	0.666667	0.333333	0.5	0.5	0.555556
0.319931	0.337955	1	0.454545	0.833333	0.714286	0.3	0.222222	0.5	0.666667	0.5	0.555556
0.374516	0.299062	0.666667	0.545455	1	0.285714	0.1	0.222222	0.5	0.5	0.5	0.666667
0.281051	0.302273	0.666667	0.545455	0.833333	0.714286	0	0.111111	0.333333	0.5	0.5	0.444444
0.411182	0.278775	0.666667	0.363636	0.833333	0.571429	0	0.111111	0.5	0.5	0.5	0.666667
0.375655	0.289479	1	0.454545	0.666667	0.714286	0.3	0.222222	0.333333	0.5	0.5	0.666667
0.298754	0.249516	1	0.272727	0.833333	0.714286	0.4	0.222222	0.5	0.333333	0.5	0.555556
0.145662	0.384494	0.666667	0.545455	0.833333	0.714286	0.2	0.222222	0.333333	0.5	0.833333	0.666667
0.267639	0.350138	0.666667	0.454545	0.666667	0.714286	0.3	0.222222	0.666667	0.666667	0.5	0.666667
0.243874	0.350494	1	0.545455	0.666667	0.714286	0	0.222222	0.5	0.5	0.333333	0.555556
0.300122	0.343256	0.666667	0.454545	0.833333	0.714286	0	0.222222	0.5	0.5	0.5	0.666667
0.149055	0.390662	1	0.454545	0.833333	0.714286	0	0.555556	0.5	0.5	0.5	0.444444
0.242198	0.376542	1	0.454545	0.666667	0.428571	0	0.444444	0.5	0.5	0.5	0.444444
0.161353	0.344021	1	0.363636	0.833333	0.571429	0	0.444444	0.5	0.5	0.5	0.555556
0.261014	0.378989	1	0.363636	0.666667	0.714286	0.3	0.333333	0.5	0.333333	0.5	0.555556
0.290238	0.304057	1	0.454545	0.833333	0.571429	0	0.333333	0.5	0.5	0.5	0.555556
0.28439	0.462738	1	0.454545	0.833333	0.714286	0	0.777778	0.5	0.5	0.5	0.444444
0.245524	0.281782	1	0.363636	0.666667	0.428571	0	0.555556	0.833333	0.666667	0.5	0.444444
0.216917	0.293098	1	0.545455	0.833333	0.428571	0.1	0.222222	0.5	0.5	0.5	0.555556
0.216434	0.275665	1	0.363636	0.666667	0.428571	0	0.333333	0.5	0.5	0.5	0.666667
0.253852	0.246457	1	0.545455	0.666667	0.428571	0	0.222222	0.5	0.5	0.5	0.555556
0.163365	0.416964	1	0.454545	0.833333	0.428571	0	0.444444	0.666667	0.666667	0.5	0.333333
0.174041	0.334438	1	0.363636	0.833333	0.714286	0.3	0.333333	0.5	0.666667	0.5	0.555556
0.193219	0.258334	1	0.454545	0.666667	0.285714	0	0.222222	0.666667	0.666667	0.5	0.333333
0.214691	0.320012	1	0.363636	0.833333	0.714286	0	0.444444	0.666667	0.5	0.833333	0.555556
0.238107	0.365328	1	0.545455	0.833333	0.571429	0.4	0.222222	0.5	0.333333	0.5	0.666667
0.177286	0.258946	1	0.363636	0.666667	0.285714	0	0.222222	0.666667	0.5	0.5	0.444444
0.121588	0.344276	0.666667	0.545455	0.833333	0.428571	0	0.444444	0.5	0.5	0.5	0.555556
0.151161	0.42094	1	0.727273	0.666667	0.571429	0.5	0.444444	0.5	0.5	0.5	0.666667
0.092821	0.274187	1	0.545455	0.5	0.285714	0	0.333333	0.666667	0.5	0.5	0.444444
0.15214	0.239831	1	0.272727	0.666667	0.285714	0	0.222222	0.666667	0.5	0.5	0.555556
0.140378	0.369864	1	0.545455	0.666667	0.571429	0	0.222222	0.666667	0.5	0.5	0.555556
0.145582	0.332756	1	0.545455	0.833333	0.571429	0	0.333333	0.5	0	0.5	0.555556
0.118611	0.472474	1	0.636364	0.833333	0.714286	0.2	0.666667	0.5	0.666667	0.5	0.666667
0.155908	0.298094	0.666667	0.636364	0.666667	0.285714	0	0.222222	0.5	0.5	0.5	0.444444
0.216126	0.33454	1	0.545455	0.833333	0.428571	0	0.777778	0.5	0.5	0.5	0.444444
0.198664	0.339076	1	0.545455	0.833333	0.428571	0	0.555556	0.666667	0.5	0.5	0.444444
0.189598	0.329901	1	0.545455	0.666667	0.285714	0	0.333333	0.666667	0.5	0.5	0.555556
0.223422	0.283719	1	0.454545	0.666667	0.285714	0	0.666667	0.5	0.333333	0.5	0.333333
0.05842	0.313386	1	0.454545	0.666667	0.285714	0.1	0.333333	0.666667	0.333333	0.5	0.666667
0.059748	0.341676	1	0.363636	0.833333	0.571429	0.1	0.666667	0.666667	0.666667	0.5	0.666667
0.138943	0.290346	1	0.272727	0.833333	0.428571	0	0.222222	0.5	0.666667	0.5	0.666667
0.150021	0.344989	0.666667	0.454545	0.833333	0.571429	0	0.222222	0.5	0.5	0.5	0.444444
0.160053	0.338821	1	0.454545	0.666667	0.285714	0.2	0.222222	0.5	0.666667	0.5	0.666667
0.14931	0.477623	1	0.727273	0.666667	0.571429	0.3	0.444444	0.5	0.666667	0.5	0.666667
0.183938	0.339739	1	0.454545	0.666667	0.285714	0.2	0.444444	0.5	0.666667	0.5	0.555556
0.26607	0.459782	1	0.545455	0.833333	0.571429	0.2	0.222222	0.666667	0.666667	0.5	0.666667
0.171774	0.324447	1	0.454545	0.666667	0.285714	0.1	0.333333	0.666667	0.666667	0.833333	0.666667
0.13276	0.276328	1	0.272727	0.5	0.285714	0.2	0.333333	0.666667	0.5	0.833333	0.666667
0.158926	0.354063	1	0.454545	0.666667	0.285714	0.3	0.333333	0.5	0.666667	0.5	0.666667
0.136904	0.423845	1	0.454545	0.833333	0.571429	0.5	0.333333	0.666667	0.833333	0.833333	0.666667
0.106983	0.34555	0.666667	0.363636	0.666667	0.285714	0.2	0.222222	0.5	0.666667	0.833333	0.666667
0.128321	0.412122	1	0.454545	0.833333	0.428571	0.6	0.222222	0.666667	0.5	0.5	0.666667
0.127691	0.383219	1	0.454545	0.833333	0.428571	0.2	0.333333	0.5	0.5	0.833333	0.666667
0.156485	0.492966	1	0.454545	0.833333	0.428571	0.1	0.222222	0.666667	0.666667	0.833333	0.555556
0.2036	0.390866	1	0.545455	0.833333	0.428571	0.2	0.222222	0.666667	0.666667	0.833333	0.666667
0.216421	0.379651	0.666667	0.454545	0.666667	0.571429	0.2	0.222222	0.5	0.666667	0.833333	0.666667
0.21225	0.349628	1	0.454545	0.833333	0.428571	0.2	0.222222	0.5	0.5	0.833333	0.666667
0.167643	0.337853	1	0.363636	0.833333	0.428571	0.2	0.333333	0.5	0.666667	0.833333	0.666667
0.244666	0.319146	1	0.454545	0.833333	0.428571	0	0.222222	0.666667	0.666667	0.5	0.666667
0.260102	0.419105	1	0.454545	0.833333	0.428571	0	0.222222	0.666667	0.666667	0.5	0.666667
0.275405	0.438016	1	0.454545	0.833333	0.428571	0.2	0.222222	0.666667	0.5	0.5	0.666667
0.202527	0.43455	1	0.454545	0.833333	0.428571	0.5	0.333333	0.666667	0.5	0.833333	0.666667
0.139882	0.359517	1	0.454545	0.666667	0.428571	0.1	0.333333	0.5	0.666667	0.833333	0.444444
0.187211	0.327709	1	0.636364	0.833333	0.428571	0	0.333333	0.666667	0.5	0.5	0.666667
0.1339	0.355541	1	0.545455	0.833333	0.428571	0.1	0.222222	0.666667	0.666667	0.833333	0.666667
0.208401	0.454175	1	0.454545	0.833333	0.428571	0.1	0.222222	0.666667	0.666667	0.5	0.555556
0.167778	0.516566	1	0.545455	0.833333	0.428571	0.2	0.222222	0.666667	0.5	0.5	0.444444
0.1385	0.411918	1	0.454545	0.833333	0.428571	0.2	0.222222	0.666667	0.5	0.833333	0.666667
0.151134	0.326792	1	0.181818	0.833333	0.428571	0	0.222222	0.5	0.666667	0.5	0.666667
0.222778	0.366449	1	0.454545	0.833333	0.428571	0.1	0.333333	0.5	0.666667	0.5	0.666667
0.169883	0.323376	0.666667	0.181818	0.833333	0.428571	0	0.666667	0.666667	0.5	0.5	0.555556
0.156002	0.377103	1	0.454545	0.833333	0.428571	0	0.333333	0.666667	0.5	0.5	0.444444
0.168421	0.380161	1	0.363636	0.833333	0.571429	0	0.333333	0.666667	0.5	0.5	0.666667
0.345372	0.37695	1	0.454545	0.833333	0.428571	0	0.333333	0.666667	0.5	0.5	0.555556
0.412483	0.421959	1	0.272727	0.833333	0.428571	0.2	0.333333	0.666667	0.5	0.5	0.666667
0.264166	0.348303	1	0.363636	0.833333	0.428571	0	0.111111	0.5	0.666667	0.5	0.333333
0.220914	0.328066	1	0.272727	0.833333	0.428571	0.1	0.222222	0.666667	0.666667	0.833333	0.555556
0.215281	0.343766	1	0.272727	0.833333	0.571429	0	0.222222	0.833333	0.666667	0.5	0.666667
0.165256	0.365583	1	0.363636	0.833333	0.571429	0	0.222222	0.666667	0.5	0.5	0.555556
0.225554	0.354572	1	0.454545	0.833333	0.571429	0	0.111111	0.833333	0.5	0.833333	0.666667
0.251626	0.423132	1	0.454545	0.833333	0.571429	0.1	0.444444	0.666667	0.5	0.5	0.666667
0.282821	0.337547	1	0.363636	0.833333	0.571429	0.2	0.222222	0.833333	0.666667	0.5	0.666667
0.257688	0.440718	1	0.363636	0.833333	0.571429	0.1	0.222222	0.666667	0.666667	0.5	0.666667
0.286979	0.39739	0.666667	0.454545	0.833333	0.571429	0.1	0.444444	0.666667	0.833333	0.5	0.666667
0.287891	0.334591	0.666667	0.363636	0.833333	0.428571	0.1	0.222222	0.666667	0.5	0.833333	0.666667
0.264434	0.691049	1	0.636364	0.833333	0.428571	0.2	0.222222	0.666667	0.5	0.5	0.555556
0.330325	0.620298	1	0.363636	1	0.428571	0.1	0.222222	0.5	0.5	0.5	0.666667
0.329547	0.631716	1	0.545455	0.833333	0.428571	0	0.222222	0.833333	0.5	0.5	0.444444
0.376514	0.460699	0.666667	0.545455	0.833333	0.714286	0	0.111111	0.666667	0.5	0.5	0.444444
0.397328	0.303752	1	0.363636	0.666667	0.428571	0.1	0.222222	0.833333	0.666667	0.5	0.444444
0.378646	0.73193	1	0.636364	0.833333	0.428571	0.1	0.222222	0.833333	0.5	0.5	0.666667
0.32787	0.462891	1	0.454545	0.833333	0.428571	0.1	0.222222	0.666667	0.5	0.5	0.555556
0.363599	0.775767	1	0.545455	0.833333	0.571429	0.1	0.555556	0.666667	0.666667	0.333333	0.666667
0.346204	0.837598	0.666667	0.545455	0.833333	0.428571	0.1	0.444444	0.666667	0.5	0.5	0.555556
0.365114	0.33663	0.666667	0.272727	0.833333	0.571429	0.1	0.222222	0.666667	0.166667	0.833333	0.555556
0.246744	0.263381	1	0.272727	0.833333	0.428571	0	0.111111	0.833333	0.5	0.5	0.444444
0.321875	0.358497	1	0.454545	0.833333	0.571429	0	0.111111	0.666667	0.166667	0.5	0.444444
0.346177	0.312213	1	0.363636	0.833333	0.428571	0	0.222222	0.833333	0	0.5	0.444444
0.478106	0.42512	0.666667	0.545455	0.833333	0.428571	0.2	0.222222	0.833333	0.5	0.5	0.555556
0.345547	0.302987	0.666667	0.272727	0.833333	0.428571	0.1	0.222222	0.833333	0.5	0.5	0.555556
0.324705	0.326027	0.666667	0.363636	0.833333	0.428571	0.1	0.222222	0.833333	0.666667	0.5	0.555556
0.415193	0.754919	1	0.636364	0.833333	0.428571	0	0.111111	0.833333	0.5	0.5	0.444444
0.320534	0.721378	1	0.545455	0.833333	0.428571	0	0.111111	0.833333	0.5	0.5	0.444444
0.267881	0.267713	0.666667	0.363636	0.666667	0.571429	0	0.111111	0.833333	0.5	0.333333	0.333333
0.261631	0.373178	1	0.454545	0.833333	0.428571	0.1	0.222222	0.833333	0.333333	0.5	0.555556
0.327696	0.295035	1	0.363636	0.833333	0.428571	0.1	0.222222	0.833333	0.5	0.5	0.555556
0.244894	0.408197	1	0.545455	0.833333	0.428571	0	0.111111	0.833333	0.5	0.5	0.555556
0.176441	0.325874	1	0.454545	0.833333	0.428571	0.1	0.222222	0.833333	0.5	0.5	0.555556
0.195271	0.681211	1	0.636364	0.833333	0.428571	0.2	0.222222	0.833333	0.5	0.666667	0.666667
0.37528	0.421297	1	0.363636	0.833333	0.428571	0.2	0.222222	0.833333	0.333333	0.833333	0.666667
0.336816	0.341472	1	0.454545	0.833333	0.571429	0.1	0.222222	0.666667	0.166667	0.833333	0.555556
0.403565	0.417015	1	0.454545	0.833333	0.714286	0	0.111111	0.833333	0.166667	0.5	0.333333
0.470434	0.429453	1	0.636364	0.833333	0.428571	0	0	0.833333	0.5	0.5	0.222222
0.482277	0.391375	1	0.454545	0.833333	0.428571	0	0.333333	0.833333	0.5	0.5	0.444444
0.524898	0.406514	0.666667	0.363636	0.833333	0.428571	0	0.333333	0.666667	0.666667	0.5	0.444444
0.442485	0.322459	0.666667	0.545455	0.833333	0.428571	0	0.222222	0.666667	0.5	0.5	0.444444
0.405992	0.357427	1	0.363636	0.833333	0.428571	0	0.222222	0.666667	0.5	0.5	0.444444
0.226681	0.438934	1	0.545455	0.833333	0.571429	0.2	0.222222	0.833333	0.5	0.833333	0.555556
0.236632	0.328168	1	0.363636	0.833333	0.428571	0	0.222222	0.666667	0.5	0.5	0.444444
0.24087	0.367418	1	0.454545	0.833333	0.428571	0	0.222222	0.666667	0.5	0.333333	0.444444
0.450974	0.370221	0.666667	0.545455	0.833333	0.571429	0	0.222222	0.666667	0.5	0.5	0.444444
0.496547	0.295647	0.666667	0.545455	0.833333	0.571429	0.1	0.222222	0.666667	0	0.5	0.666667
0.417633	0.417117	1	0.545455	0.833333	0.428571	0	0.111111	0.666667	0.5	0.5	0.444444
0.429221	0.358395	0.666667	0.454545	0.833333	0.428571	0	0.222222	0.666667	0	0.5	0.444444
0.305111	0.383372	1	0.454545	0.833333	0.714286	0.1	0.222222	0.666667	0.666667	0.5	0.555556
0.415018	0.41258	1	0.454545	0.833333	0.571429	0	0.333333	0.666667	0.333333	0.5	0.444444
0.362056	0.491742	1	0.454545	0.833333	0.571429	0	0.333333	0.666667	0.5	0.5	0.555556
0.310663	0.485778	1	0.545455	0.833333	0.714286	0.2	0.333333	0.666667	0.5	0.5	0.666667
0.342972	0.386074	0.666667	0.454545	0.833333	0.571429	0	0.333333	0.833333	0.5	0.5	0.444444
0.314647	0.409063	1	0.545455	0.833333	0.571429	0	0.111111	0.833333	0.5	0.5	0.444444
0.236176	0.360791	0.666667	0.363636	0.833333	0.571429	0	0.222222	0.666667	0.5	0.5	0.444444
0.310972	0.397288	1	0.454545	0.833333	0.571429	0	0.111111	0.666667	0.5	0.5	0.444444
0.304145	0.448568	0.666667	0.545455	0.833333	0.428571	0	0.222222	0.666667	0.5	0.5	0.555556
0.346003	0.393057	1	0.818182	1	0.428571	0	0.111111	0.833333	0.5	0.5	0.444444
0.294838	0.405342	1	0.545455	0.833333	0.571429	0	0.333333	0.833333	0.666667	0.5	0.444444
0.401955	0.470384	1	0.545455	0.833333	0.428571	0	0.111111	0.666667	0.5	0.5	0.444444
0.390207	0.39479	1	0.545455	0.833333	0.571429	0.1	0.333333	0.833333	0.666667	0.666667	0.666667
0.302295	0.453461	1	0.454545	0.833333	0.571429	0.2	0.333333	0.666667	0.5	0.5	0.666667
0.308612	0.362728	1	0.454545	0.833333	0.428571	0.2	0.222222	0.666667	0.333333	0.5	0.444444
0.179942	0.404679	0.666667	0.545455	0.833333	0.571429	0.2	0.222222	0.666667	0.333333	0.5	0.666667
0.192186	0.330258	1	0.545455	0.666667	0.428571	0.3	0.222222	0.666667	0.5	0.5	0.555556
0.170581	0.387144	1	0.636364	0.833333	0.571429	0	0.111111	0.666667	0	0.5	0.555556
0.131204	0.543073	0.666667	0.545455	0.666667	0.428571	0.1	0.222222	0.666667	0.5	0.5	0.666667
0.18992	0.612856	0.666667	0.636364	0.833333	0.571429	0	0.333333	0.666667	0.5	0.5	0.444444
0.271985	0.471659	1	0.636364	0.666667	0.571429	0	0.888889	0.666667	0.5	0.5	0.444444
0.17852	0.476246	1	0.545455	0.833333	0.571429	0	0.666667	0.666667	0.166667	0.5	0.444444
0.156351	0.466408	1	0.454545	0.833333	0.428571	0	0.222222	0.666667	0.5	0.5	0.444444
0.147955	0.436844	1	0.454545	0.833333	0.428571	0.1	0.222222	0.5	0.5	0.5	0.666667
0.238577	0.650525	0.666667	0.636364	0.833333	0.428571	0.2	0.222222	0.666667	0.666667	0.5	0.555556
0.2242	0.618565	1	0.545455	0.833333	0.428571	0.1	0.222222	0.666667	0.666667	0.5	0.555556
0.210238	0.401876	1	0.545455	0.833333	0.571429	0.1	0.222222	0.666667	0.5	0.5	0.555556
0.148103	0.347589	1	0.636364	0.833333	0.428571	0	0.222222	0.833333	0.666667	0.5	0.444444
0.177233	0.412172	1	0.363636	0.833333	0.428571	0	0.222222	0.833333	0.666667	0.5	0.444444
0.121776	0.454379	1	0.545455	0.666667	0.285714	0.1	0.222222	0.666667	0.5	0.5	0.666667
0.11381	0.364971	1	0.636364	0.833333	0.571429	0.2	0.333333	0.666667	0.333333	0.5	0.666667
0.15497	0.595066	1	0.545455	0.833333	0.428571	0	0.222222	0.666667	0.666667	0.5	0.444444
0.243016	0.649913	1	0.545455	0.666667	0.571429	0.1	0.222222	0.666667	0.666667	0.5	0.555556
0.16586	0.386635	0.666667	0.636364	0.666667	0.714286	0	0.222222	0.5	0.333333	0.5	0.666667
0.14298	0.350698	1	0.545455	0.5	0.714286	0.1	0.222222	0.333333	0.5	0.5	0.555556
0.128804	0.250637	0.666667	0.454545	0.666667	0.285714	0.2	0.222222	0.666667	0.666667	0.5	0.777778
0.131392	0.685085	0.666667	0.545455	0.666667	0.428571	0.6	0.222222	0.333333	0.5	0.833333	0.777778
0.17742	0.430166	0.666667	0.454545	0.833333	0.285714	0.2	0.222222	0.333333	1	0.5	0.666667
0.190564	0.228158	1	0.363636	0.666667	0.285714	0.2	0.222222	0.5	0.666667	0.5	0.777778
0.210574	0.238454	0.666667	0.454545	0.666667	0.285714	0.1	0.222222	0.666667	0.333333	0.5	0.666667
0.234701	0.674432	1	0.727273	0.666667	0.428571	0.1	0.222222	0.5	0.666667	0.5	0.666667
0.258882	0.255786	1	0.545455	0.666667	0.285714	0.2	0.222222	0.666667	0.5	0.5	0.555556
0.250526	0.457845	0.666667	0.545455	0.666667	0.428571	0.1	0.333333	0.833333	0.666667	0.333333	0.555556
0.234714	0.250637	1	0.363636	0.666667	0.285714	0	0.222222	0.833333	0.5	0.5	0.333333
0.114977	0.263533	0.666667	0.454545	0.666667	0.428571	0	0.222222	0.5	0.666667	0.5	0.444444
0.103	0.189979	1	0.363636	0.666667	0.285714	0	0.222222	0.666667	0.5	0.333333	0.333333
0.196036	0.32302	0.666667	0.545455	0.666667	0.285714	0.3	0.222222	0.5	0.666667	0.833333	0.666667
0.088234	0.26231	1	0.454545	0.666667	0.428571	0	0.222222	0.666667	0.666667	0.5	0.444444
0.103148	0.364155	1	0.545455	0.666667	0.285714	0.2	0.333333	0.666667	0.666667	0.833333	0.777778
0.046042	0.260526	1	0.545455	0.666667	0.428571	0	0.444444	0.5	0.666667	0.333333	0.444444
0.122353	0.329289	1	0.545455	0.666667	0.714286	0	0.333333	0.666667	0.5	0.5	0.555556
0.146373	0.436232	0.666667	0.636364	0.666667	0.428571	0	0.444444	0.5	0.166667	0.5	0.555556
0.084921	0.309206	0.666667	0.454545	0.666667	0.571429	0	0.444444	0.833333	0.5	0.5	0.555556
0.173679	0.406362	1	0.545455	0.833333	0.571429	0	0.444444	0.666667	0.833333	0.5	0.444444
0.104247	0.25604	0.666667	0.545455	0.666667	0.285714	0	0.333333	0.5	0.666667	0.5	0.444444
0.157719	0.27485	1	0.363636	0.5	0.428571	0	0.444444	0.666667	0.666667	0.5	0.444444
0.151684	0.216995	0.666667	0.363636	0.666667	0.285714	0	0.333333	0.5	0.666667	0.5	0.555556
0.174336	0.464624	0.666667	0.545455	0.666667	0.714286	0	0.333333	0.5	0.666667	0.5	0.444444
0.153803	0.461974	0.666667	0.454545	0.833333	0.714286	0	0.444444	0.666667	0.666667	0.5	0.444444
0.229537	0.445305	0.666667	0.545455	0.666667	0.714286	0	0.333333	0.666667	0.333333	0.5	0.444444
0.326891	0.496891	1	0.636364	0.666667	0.714286	0	0.444444	0.666667	0.666667	0.5	0.333333
0.330633	0.611887	0.666667	0.454545	0.833333	0.714286	0.3	0.333333	0.666667	0.666667	0.5	0.666667
0.293497	0.42777	0.666667	0.636364	0.833333	0.571429	0	0.222222	0.666667	0.5	0.5	0.333333
0.181846	0.400296	0.666667	0.636364	0.666667	0.571429	0	0.222222	0.5	0.5	0.5	0.444444
0.25459	0.423132	1	0.636364	0.666667	0.285714	0	0.444444	0.666667	0.5	0.5	0.444444
0.249668	0.483179	0.666667	0.454545	0.666667	0.571429	0	0.444444	0.666667	0.666667	0.5	0.444444
0.275847	0.486747	1	0.636364	0.666667	0.714286	0	0.333333	0.666667	0.5	0.5	0.444444
0.373818	0.443215	0.666667	0.636364	0.666667	0.571429	0	0.444444	0.666667	0.333333	0.5	0.555556
0.351917	0.447548	0.666667	0.545455	0.833333	0.428571	0	0.444444	0.666667	0.5	0.5	0.444444
0.474216	0.361148	1	0.363636	0.666667	0.428571	0	0.222222	0.666667	0.5	0.5	0.444444
0.369057	0.496126	0.666667	0.636364	0.833333	0.571429	0	0.222222	0.5	0.666667	0.5	0.555556
0.334536	0.462127	0.666667	0.636364	1	0.428571	0	0.222222	0.333333	0.5	0.5	0.444444
0.237785	0.495056	1	0.636364	0.833333	0.714286	0	0.333333	0.666667	0.5	0.5	0.666667
0.26088	0.479101	0.666667	0.454545	0.833333	0.714286	0	0.333333	0.666667	0.5	0.5	0.444444
0.21512	0.441839	1	0.454545	0.666667	0.285714	0	0.222222	0.666667	0.5	0.5	0.444444
0.190456	0.533999	1	0.545455	0.833333	0.428571	0	0.444444	0.666667	0.5	0.5	0.555556
0.130145	0.580589	1	0.545455	0.833333	0.714286	0.2	0.222222	0.5	0.5	0.833333	0.666667
0.253249	0.693802	1	0.545455	0.833333	0.571429	0.5	0.222222	0.666667	0.166667	0.5	0.666667
0.22487	0.643236	0.666667	0.545455	0.833333	0.428571	0.2	0.333333	0.666667	0.833333	0.833333	0.666667
0.255623	0.511571	1	0.545455	0.833333	0.571429	0	0.333333	0.666667	0.666667	0.5	0.555556
0.186621	0.33928	0.666667	0.545455	0.833333	0.428571	0.1	0.333333	0.666667	0.333333	0.5	0.555556
0.259834	0.478642	0.666667	0.545455	0.833333	0.571429	0	0.222222	0.5	0.666667	0.5	0.222222
0.322841	0.669946	0.666667	0.454545	0.833333	0.714286	0.5	0.222222	0.666667	0.666667	0.833333	0.666667
0.264917	0.472525	0.666667	0.727273	0.666667	0.428571	0.7	0.222222	0.666667	0.666667	0.5	0.666667
0.284766	0.326537	1	0.363636	0.666667	0.571429	0.5	0.444444	0.5	0.666667	0.833333	0.666667
0.222067	0.476399	0.666667	0.545455	0.833333	0.571429	0.4	0.222222	0.666667	0.666667	0.5	0.666667
0.251117	0.386941	1	0.545455	0.666667	0.285714	0	0.333333	0.666667	0.833333	0.5	0.444444
0.17455	0.425324	0.666667	0.545455	0.666667	0.285714	0.2	0.333333	0.5	0.5	1	0.666667
0.143597	0.328423	0.666667	0.363636	0.666667	0.428571	0.4	0.444444	0.666667	0.5	0.833333	0.666667
0.212103	0.696401	0.666667	0.636364	0.666667	0.285714	0.7	0.444444	0.5	0.5	0.833333	0.666667
0.206175	0.489448	1	0.454545	0.833333	0.571429	0.2	0.333333	0.5	0.5	0.833333	0.777778
0.282794	0.460444	1	0.545455	0.666667	0.285714	0.4	0.333333	0.666667	0.666667	0.833333	0.666667
0.265574	0.450352	1	0.545455	0.833333	0.714286	0	0.333333	0.666667	0.5	0.333333	0.444444
0.277121	0.42094	0.666667	0.454545	0.833333	0.571429	0	0.222222	0.666667	0.5	0.5	0.444444
0.258171	0.56071	1	0.545455	0.833333	0.714286	0.1	0.444444	0.666667	0.5	0.5	0.666667
0.341792	0.529004	0.666667	0.545455	0.833333	0.571429	0.2	0.333333	0.666667	0.5	0.5	0.666667
0.394552	0.494036	0.666667	0.545455	0.833333	0.714286	0	0.444444	0.5	0.5	0.5	0.555556
0.360621	0.478336	1	0.636364	0.833333	0.714286	0	0.222222	0.666667	0.666667	0.5	0.333333
0.264313	0.465746	1	0.454545	0.833333	0.571429	0	0.333333	0.5	0.833333	0.5	0.555556
0.385848	0.258028	0.666667	0.363636	0.833333	0.714286	0	0.444444	0.5	0.666667	0.666667	0.555556
0.37241	0.455296	1	0.545455	0.833333	0.571429	0	0.555556	0.833333	0.666667	0.5	0.555556
0.240025	0.490213	1	0.545455	0.833333	0.285714	0	0.444444	0.5	0.333333	0.5	0.555556
0.184207	0.49266	1	0.545455	0.666667	0.428571	0	0.666667	0.5	0.5	0.5	0.666667
0.333664	0.373535	0.666667	0.545455	0.833333	0.857143	0.1	0.222222	0.333333	0.666667	0.5	0.666667
0.28207	0.758997	1	0.636364	0.833333	0.571429	0.4	0.333333	0.333333	0.666667	0.833333	0.666667
0.298942	0.478387	1	0.545455	0.666667	0.571429	0.2	0.444444	0.333333	0.5	0.833333	0.666667
0.296796	0.336783	1	0.545455	0.666667	0.285714	0.2	0.333333	0.333333	0.833333	0.5	0.666667
0.328581	0.264961	0.666667	0.454545	0.666667	0.285714	0	0.333333	0.666667	0.666667	0.5	0.555556
0.3855	0.753849	1	0.545455	0.833333	0.714286	0.6	0.222222	0.5	0.833333	0.5	0.555556
0.414884	0.405597	0.666667	0.545455	0.666667	0.285714	0	0.333333	0.333333	0.666667	0.5	0.444444
0.345158	0.733459	0.666667	0.909091	0.666667	0.285714	0.6	0.333333	0.333333	0.666667	0.833333	0.777778
0.235318	0.480426	0.666667	0.636364	0.833333	0.571429	0.2	0.333333	0.333333	0.666667	0.833333	0.666667
0.290935	0.386941	1	0.727273	0.666667	0.285714	0.2	0.222222	0.666667	0.666667	0.666667	0.666667
0.337956	0.441125	0.666667	0.454545	0.833333	0.714286	0	0.222222	0.333333	0.666667	0.5	0.333333
0.30719	0.608523	0.666667	0.454545	0.833333	0.428571	0.3	0.222222	0.333333	0.833333	0.833333	0.777778
0.330928	0.574829	0.666667	0.545455	0.666667	0.285714	0.5	0.222222	0.333333	0.333333	0.5	0.666667
0.294945	0.422367	0.666667	0.545455	0.666667	0.285714	0.3	0.222222	0.333333	0.666667	0.5	0.666667
0.238684	0.510603	0.666667	0.454545	0.833333	0.571429	0.2	0.222222	0.333333	0.833333	0.5	0.666667
0.291364	0.443623	0.666667	0.454545	0.833333	0.428571	0.2	0.222222	0.333333	0.5	0.5	0.666667
0.177112	0.486849	0.666667	0.545455	0.833333	0.571429	0.3	0.333333	0.333333	0.5	0.833333	0.666667
0.240696	0.730554	0.666667	0.636364	0.833333	0.857143	0.5	0.222222	0.333333	0.666667	0.833333	0.666667
0.267559	0.911306	0.666667	0.545455	0.833333	0.857143	0.4	0.222222	0.333333	0.666667	0.5	0.666667
0.262811	0.686869	0.666667	0.454545	0.833333	0.714286	0.4	0.222222	0.333333	0.333333	0.833333	0.666667
0.208414	0.675655	0.666667	0.454545	0.666667	0.857143	0.4	0.333333	0.5	0.833333	0.833333	0.666667
0.230516	0.725558	0.666667	0.454545	0.833333	0.714286	0.4	0.222222	0.5	0.666667	0.666667	0.666667
0.339565	0.710317	0.666667	1	0.833333	0.857143	0.4	0.222222	0.5	0.5	0.833333	0.666667
0.323793	0.63717	0.666667	0.545455	0.666667	1	0.5	0.222222	0.333333	0	0.5	0.666667
0.270737	0.661841	0.666667	0.454545	0.666667	0.428571	0.6	0.222222	0.5	0	0.5	0.888889
0.272696	0.750076	0.666667	0.727273	0.833333	0.571429	0.5	0.222222	0.333333	0.5	0.833333	0.777778
0.304065	0.677235	0.666667	0.545455	0.5	0.285714	0.5	0.222222	0.333333	0.666667	0.833333	0.666667
0.38381	0.513202	0.666667	0.545455	0.833333	0.714286	0	0.222222	0.5	0.5	0.5	0.444444
0.361855	0.256601	0.666667	0.272727	0.833333	0.857143	0	0.222222	0.666667	0.666667	0.5	0.444444
0.337513	0.87904	1	0.727273	0.833333	0.857143	0.5	0.222222	0.5	0.5	0.833333	0.666667
0.215187	0.850392	1	0.636364	0.833333	0.714286	0.4	0.444444	0.333333	0.666667	0.833333	0.666667
0.215576	0.805179	1	0.636364	0.833333	0.714286	0.6	0.222222	0.5	0.333333	0.833333	0.666667
0.247643	0.566215	0.666667	0.545455	0.833333	0.714286	0.6	0.333333	0.333333	0.166667	0.5	0.666667
0.280702	0.650372	1	0.636364	0.833333	0.714286	0	0.222222	0.5	0.5	0.5	0.666667
0.302778	0.721378	0.666667	0.636364	0.833333	0.714286	0.3	0.333333	0.333333	0.666667	0.833333	0.555556
0.209259	0.773117	0.666667	1	0.666667	0.428571	0.3	0.333333	0.333333	0.5	0.5	0.777778
0.229886	0.413498	1	0.545455	0.833333	0.714286	0.3	0.333333	0.333333	0.666667	0.5	0.777778
0.305138	0.540728	1	0.272727	0.833333	0.571429	0.4	0.333333	0.333333	0.333333	0.5	0.666667
0.304199	0.706902	1	0.909091	0.833333	0.714286	0.2	0.222222	0.333333	0.666667	0.833333	0.666667
0.218138	0.435977	1	0.545455	0.833333	0.571429	0.3	0.333333	0.333333	0.666667	0.833333	0.777778
0.253437	0.388776	1	0.545455	0.833333	0.571429	0.3	0.333333	0.333333	0.5	0.833333	0.666667
0.283921	0.475839	0.666667	0.454545	0.833333	0.714286	0.2	0.222222	0.666667	0.666667	0.833333	0.666667
0.286751	0.342186	1	0.363636	0.833333	0.571429	0.2	0.222222	0.333333	0.5	0.833333	0.666667
0.263227	0.659547	1	0.454545	0.833333	0.428571	0.4	0.333333	0.333333	0.833333	0.833333	0.666667
0.288803	0.484351	1	0.545455	0.833333	0.571429	0.2	0.333333	0.5	0.666667	0.833333	0.777778
0.186339	0.903507	1	0.545455	0.833333	0.428571	0.7	0.222222	0.5	0.666667	0.833333	0.777778
0.182423	0.86074	1	0.545455	0.833333	0.571429	0.4	0.333333	0.333333	0.666667	0.833333	0.666667
0.333155	0.480222	1	0.545455	0.833333	0.857143	0.2	0.222222	0.666667	0.833333	0.833333	0.666667
0.411625	0.863544	1	0.545455	0.833333	0.714286	0.8	0.333333	0.666667	0.5	0.833333	0.666667
0.326449	0.62249	0.666667	0.545455	0.833333	0.714286	0	0.222222	0.333333	0.833333	0.5	0.555556
0.41927	0.661077	1	0.545455	0.833333	0.571429	0.2	0.333333	0.333333	0.666667	0.666667	0.888889
0.298151	0.695382	1	0.636364	0.833333	0.571429	0.2	0.333333	0.666667	1	0.5	0.666667
0.252645	0.905495	0.666667	0.636364	0.833333	0.857143	0.5	0.333333	0.5	0.333333	0.833333	0.666667
0.096093	0.657457	1	0.545455	0.833333	0.857143	0.2	0.444444	0.666667	0.666667	0.833333	0.666667
0.132586	0.731318	1	0.545455	0.666667	0.571429	0.2	0.222222	0.666667	1	0.5	0.777778
0.054759	0.545927	1	0.636364	0.666667	0.571429	0	0.222222	0.333333	0.666667	0.5	0.444444
0.244786	0.866857	0.666667	0.636364	0.833333	0.571429	0.4	0.444444	0.666667	0.833333	0.833333	0.777778
0.208522	0.584208	0.666667	0.818182	0.666667	0.857143	0.3	0.222222	0.5	0.5	0.5	0.888889
0.187694	0.436946	1	0.545455	0.666667	0.571429	0.4	0.333333	0.5	0.5	0.666667	0.888889
0.171224	0.7094	1	0.454545	0.666667	0.428571	0.5	0.333333	0.5	0.666667	0.833333	0.888889
0.287824	0.640636	1	0.545455	0.666667	0.714286	0.3	0.333333	0.5	0.666667	0.833333	0.666667
0.252055	0.651086	1	0.545455	0.833333	0.428571	0.4	0.333333	0.5	0.666667	0.833333	0.666667
0.270872	0.581762	1	0.636364	0.833333	0.714286	0.2	0.333333	0.5	0.333333	1	0.666667
0.158765	0.577327	0.666667	0.636364	0.833333	0.285714	0.2	0.333333	0.666667	0.666667	1	0.666667
0.183147	0.560455	1	0.545455	0.833333	0.571429	0	0.333333	0.5	0.666667	0.5	0.333333
0.126202	0.682078	1	0.636364	0.833333	0.714286	0.3	0.444444	0.333333	0.666667	0.666667	0.666667
0.128415	0.544092	1	0.636364	0.833333	0.428571	0	0.333333	0.666667	0.5	0.5	0.333333
0.115956	0.613008	0.666667	0.454545	0.666667	0.714286	0.4	0.444444	0.5	0.5	1	0.777778
0.16755	0.570598	1	0.545455	0.833333	0.428571	0	0.333333	0.666667	0.666667	0.5	0.444444
0.176508	0.444999	0.666667	0.545455	0.666667	0.571429	0.4	0.333333	0.333333	0.666667	1	0.777778
0.168395	0.528596	1	0.545455	0.666667	0.571429	0	0.222222	0.5	0.5	0.666667	0.666667
0.135027	0.624528	0.666667	0.545455	0.833333	0.428571	0.2	0.333333	0.333333	0.5	1	0.666667
0.159556	0.452187	1	0.454545	0.833333	0.428571	0.4	0.444444	0.5	0.5	1	0.888889
0.197108	0.519064	0.666667	0.545455	0.833333	0.571429	0	0.222222	0.5	0.333333	0.333333	0.333333
0.186755	0.602406	0.666667	0.545455	0.833333	0.714286	0	0.333333	0.5	0.666667	0.5	0.555556
0.155734	0.651392	1	0.636364	0.833333	0.571429	0.2	0.333333	0.333333	0.5	1	0.777778
0.22074	0.733714	0.666667	0.636364	0.833333	0.571429	0.6	0.333333	0.666667	0.5	1	0.777778
0.21508	0.426496	0.666667	0.454545	0.833333	0.571429	0.2	0.333333	0.5	0.666667	0.5	0.666667
0.213631	0.54501	0.666667	0.545455	0.833333	0.428571	0	0.333333	0.333333	0.666667	0.5	0.222222
0.157853	0.837445	1	0.545455	1	0.285714	0.5	0.222222	0.5	0.833333	1	0.666667
0.221249	0.600826	0.666667	0.636364	0.833333	0.428571	0.3	0.333333	0.5	0.666667	1	0.888889
0.203506	0.803242	1	0.545455	0.833333	0.571429	0.4	0.222222	0.5	0.5	1	0.666667
0.263857	0.811347	1	0.545455	0.833333	0.714286	0.5	0.444444	0.5	0.833333	1	0.666667
0.200971	0.795443	0.666667	0.545455	0.833333	0.428571	0.7	0.333333	0.5	1	0.666667	0.777778
0.143463	0.505505	0.666667	0.454545	0.833333	0.428571	0.2	0.444444	0.5	0.5	0.5	0.555556
0.188807	0.757977	0.666667	0.545455	0.666667	0.428571	0.5	0.444444	0.5	0.333333	1	0.777778
0.20368	0.737639	1	0.545455	0.666667	0.571429	0.6	0.333333	0.5	0.833333	0.666667	0.777778
0.174296	0.594148	1	0.545455	0.666667	0.571429	0.3	0.333333	0.5	0.666667	0.5	0.888889
0.27802	0.671322	1	0.545455	0.666667	0.714286	0.4	0.222222	0.5	0.333333	0.5	0.666667
0.242024	0.569681	0.666667	0.636364	0.666667	0.428571	0.2	0.222222	0.5	0.5	1	0.666667
0.217413	0.521766	1	0.454545	0.833333	0.571429	0.2	0.444444	0.5	0.5	0.5	0.777778
0.276934	0.840555	1	0.545455	0.833333	0.571429	0.4	0.333333	0.5	0.166667	0.833333	0.888889
0.21571	0.857682	1	0.454545	0.666667	0.571429	0.6	0.333333	0.5	0.5	1	0.888889
0.219707	0.657967	1	0.636364	0.833333	0.571429	0.2	0.222222	0.5	0.5	1	0.777778
0.278047	0.613824	0.666667	0.545455	0.833333	0.571429	0.2	0.333333	0.5	0.833333	1	0.666667
0.263857	0.380467	1	0.454545	0.833333	0.428571	0.2	0.444444	0.5	0.5	0.833333	0.777778
0.178131	0.767815	1	0.545455	0.833333	0.285714	0.5	0.333333	0.5	0.833333	1	0.666667
0.099084	0.509022	0.666667	0.454545	0.833333	0.571429	0.2	0.333333	0.5	0.666667	0.666667	0.666667
0.17903	0.656948	0.666667	0.545455	0.666667	0.428571	0.2	0.333333	0.5	0.666667	0.833333	0.888889
0.292665	0.539759	0.666667	0.636364	0.833333	0.571429	0	0.444444	0.666667	0.5	0.5	0.555556
0.220954	0.792232	0.666667	0.636364	0.666667	0.428571	0.5	0.333333	0.5	0.333333	1	0.888889
0.286764	0.58008	1	0.636364	0.833333	0.428571	0	0.444444	0.333333	0.5	0.5	0.444444
0.188056	0.667448	0.666667	0.454545	0.833333	0.428571	0.4	0.333333	0.5	0.5	0.833333	0.666667
0.278918	0.853502	0.666667	0.545455	0.666667	0.571429	0.4	0.333333	0.333333	0.666667	1	0.666667
0.239033	0.606127	1	0.636364	0.833333	0.571429	0	0.333333	0.333333	0.666667	0.5	0.444444
0.243673	0.536446	0.666667	0.454545	0.666667	0.571429	0	0.222222	0.333333	0.666667	0.5	0.444444
0.27802	0.907534	0.666667	0.636364	0.833333	0.428571	0.5	0.222222	0.5	0.666667	0.666667	0.666667
0.232998	0.763075	0.666667	0.909091	0.666667	0.571429	0.5	0.333333	0.333333	0.5	1	0.666667
0.202513	0.767204	0.666667	0.636364	0.666667	0.571429	0.4	0.222222	0.5	0.666667	1	0.777778
0.253584	0.859619	1	0.909091	0.666667	0.428571	0.4	0.444444	0.333333	0.5	1	0.666667
0.178131	0.572484	0.666667	1	0.666667	0.714286	0	0.444444	0.333333	0.5	0.666667	0.333333
0.267572	0.527067	0.666667	0.909091	0.833333	0.428571	0	0.333333	0.666667	0.666667	0.666667	0.444444
0.253866	0.855235	0.666667	0.909091	0.833333	0.571429	0.4	0.333333	0.5	0.5	1	0.777778
0.318335	0.80263	1	1	0.833333	0.571429	0.8	0.333333	0.333333	0.5	1	0.666667
0.418237	0.861607	0.666667	1	0.833333	0.571429	0.7	0.333333	0.5	0.666667	1	0.666667
0.394217	0.844938	0.666667	0.909091	0.666667	0.571429	0.6	0.222222	0.666667	0.5	1	0.666667
0.45186	0.859415	1	0.909091	0.833333	0.571429	0.8	0.333333	0.666667	0.666667	0.5	0.666667
0.490324	0.384086	0.666667	0.545455	0.833333	0.428571	0.2	0.222222	0.5	0.5	0.5	0.666667
0.418599	0.552197	0.666667	0.636364	0.833333	0.571429	0.1	0.444444	0.5	0.5	0.333333	0.555556
0.331974	0.778112	1	0.454545	0.666667	0.571429	0.8	0.444444	0.666667	0.5	0.666667	0.666667
0.409238	0.64242	1	1	0.666667	0.428571	0.1	0.444444	0.666667	0.5	0.5	0.444444
0.452946	0.661484	1	0.545455	0.666667	0.428571	0.7	0.444444	0.5	0.166667	0.5	0.666667
0.339056	0.535885	1	0.545455	0.833333	0.428571	0	0.444444	0.5	0.666667	0.666667	0.333333
0.347988	0.507544	0.666667	0.545455	0.833333	0.428571	0.1	0.444444	0.5	0.5	0.5	0.555556
0.342757	0.543684	1	0.454545	0.833333	0.285714	0.6	0.444444	0.333333	0.333333	0.833333	0.666667
0.350871	0.453563	0.666667	0.545455	0.833333	0.571429	0	0.444444	0.666667	0.333333	0.5	0.222222
0.271891	0.842186	1	1	0.833333	0.428571	0.8	0.555556	0.333333	0	1	0.777778
0.281923	0.836681	1	0.454545	0.833333	0.571429	0.6	0.222222	0.5	0.333333	1	0.666667
0.342167	0.543786	1	0.545455	0.833333	0.428571	0.1	0.444444	0.5	0.5	0.666667	0.444444
0.297145	0.742328	1	0.909091	0.666667	0.571429	0.8	0.333333	0.666667	0.5	0.5	0.666667
0.397691	0.824651	1	0.909091	0.666667	0.428571	0.8	0.444444	0.666667	0.5	0.666667	0.777778
0.388128	0.476654	0.666667	0.545455	0.666667	0.428571	0.2	0.222222	0.666667	0.5	0.5	0.444444
0.387055	0.798094	1	0.636364	0.833333	0.428571	0.8	0.444444	0.666667	0.5	0.666667	0.666667
0.344112	0.821592	1	0.454545	0.5	0.571429	0.6	0.333333	0.5	0.5	0.5	0.666667
0.343146	0.453053	1	0.454545	0.666667	0.428571	0.2	0.222222	0.5	0.5	0.166667	0.444444
0.277738	0.717912	1	0.545455	0.666667	0.428571	0.3	0.444444	0.5	0.5	0.5	0.666667
0.326771	0.755072	1	0.363636	0.833333	0.428571	0.5	0.333333	0.5	0.5	0.333333	0.666667
0.391521	0.868743	1	0.454545	0.833333	0.428571	0.6	0.444444	0.5	0.5	0.833333	0.777778
0.416131	0.62096	0.666667	0.545455	0.833333	0.428571	0.3	0.444444	0.5	0.333333	0.5	0.555556
0.415219	0.835967	1	0.636364	0.833333	0.428571	0.5	0.444444	0.5	0.5	0.833333	0.666667
0.400789	0.864359	1	0.545455	0.666667	0.571429	0.5	0.444444	0.5	0.5	1	0.666667
0.394458	0.826231	0.666667	1	0.666667	0.428571	0.6	0.333333	0.666667	0.666667	1	0.666667
0.360085	0.753186	1	0.545455	0.833333	0.428571	0.8	0.222222	0.666667	0.666667	1	0.666667
0.309912	0.551432	1	0.363636	0.833333	0.285714	0.6	0.333333	0.666667	0.5	0.833333	0.666667
0.310382	0.624834	0.666667	0.545455	0.833333	0.428571	0.6	0.444444	0.666667	0.333333	0.666667	0.666667
0.387659	0.788816	1	0.909091	0.833333	0.428571	0.6	0.333333	0.5	0.666667	1	0.666667
0.417379	0.65129	1	0.545455	0.833333	0.428571	0.5	0.222222	0.5	0.5	0.833333	0.666667
0.384292	0.811602	0.666667	1	0.833333	0.428571	0.5	0.444444	0.5	0.333333	0.5	0.666667
0.324678	0.552962	1	0.636364	0.833333	0.428571	0.4	0.333333	0.5	0.5	0.833333	0.666667
0.348162	0.87384	0.666667	1	0.666667	0.428571	0.9	0.555556	0.5	0.5	0.833333	0.666667
0.400815	0.818228	1	0.545455	0.833333	0.428571	0.5	0.222222	0.666667	0.333333	1	0.666667
0.384132	0.837088	0.666667	1	0.833333	0.428571	0.7	0.333333	0.666667	0.5	0.666667	0.666667
0.293349	0.588643	0.666667	0.909091	0.666667	0.428571	0.2	0.333333	0.666667	0.666667	0.5	0.666667
0.380765	0.777551	0.666667	0.909091	0.833333	0.428571	0.6	0.444444	0.5	0.5	0.833333	0.666667
0.262932	0.859211	0.666667	1	0.833333	0.428571	0.6	0.555556	0.666667	0.5	0.833333	0.666667
0.27	0.808951	1	0.909091	0.666667	0.428571	0.6	0.333333	0.5	0.666667	0.833333	0.666667
0.249628	0.744113	0.666667	0.636364	0.666667	0.428571	0.7	0.555556	0.666667	0.666667	0.833333	0.666667
0.21575	0.761546	1	0.545455	0.666667	0.428571	0.8	0.333333	0.666667	0.333333	0.833333	0.666667
0.205772	0.443012	0.666667	0.545455	0.833333	0.428571	0.1	0.333333	0.666667	0.5	0.5	0.444444
0.273125	0.481955	0.666667	0.636364	0.833333	0.428571	0.2	0.444444	0.5	0.666667	0.666667	0.555556
0.220136	0.785095	1	0.545455	0.833333	0.428571	0.7	0.444444	0.5	0.5	1	0.666667
0.246248	0.762667	0.666667	0.545455	0.833333	0.428571	0.9	0.666667	0.666667	0.666667	0.666667	0.666667
0.219948	0.463809	0.666667	0.545455	0.666667	0.428571	0.2	0.444444	0.666667	0.666667	0.5	0.444444
0.315116	0.533643	0.666667	1	0.666667	0.428571	0.2	0.555556	0.5	0.666667	0.5	0.444444
0.272159	0.565144	1	0.636364	0.5	0.571429	0.2	0.444444	0.5	0.5	0.5	0.444444
0.215281	0.57432	0.666667	0.818182	0.5	0.428571	0.2	0.555556	0.5	0.5	0.5	0.444444
0.265681	0.820165	0.666667	0.909091	0.666667	0.428571	0.8	0.555556	0.666667	0.5	0.666667	0.666667
0.304508	0.475176	1	0.636364	0.833333	0.428571	0.1	0.444444	0.666667	0.666667	0.666667	0.444444
0.356383	0.583291	0.666667	1	0.5	0.428571	0.2	0.555556	0.5	0.5	0.5	0.666667
0.295938	0.616271	1	1	0.666667	0.428571	0.2	0.444444	0.666667	0.666667	0.666667	0.555556
0.27692	0.459017	0.666667	0.636364	0.833333	0.428571	0.2	0.444444	0.5	0.5	0.5	0.444444
0.239073	0.543277	0.666667	0.545455	0.833333	0.428571	0.1	0.444444	0.666667	0.5	0.666667	0.444444
0.17333	0.493628	0.666667	0.636364	0.833333	0.428571	0.2	0.555556	0.666667	0.666667	0.5	0.444444
0.074058	0.508462	1	0.545455	1	0.428571	0.2	0.444444	0.5	0.5	0.666667	0.555556
0.155573	0.821847	1	0.545455	0.833333	0.428571	0.8	0.555556	0.5	0.5	0.666667	0.666667
0.189236	0.44867	0.666667	0.636364	0.666667	0.428571	0.2	0.444444	0.666667	0.666667	0.5	0.444444
0.217615	0.536752	1	0.636364	0.666667	0.428571	0.2	0.444444	0.833333	0.5	0.666667	0.666667
0.197632	0.491589	1	1	0.666667	0.428571	0.1	0.333333	0.666667	0.5	0.5	0.444444
0.326261	0.551636	0.666667	1	0.833333	0.428571	0.2	0.444444	0.666667	0.666667	0.666667	0.555556
0.313198	0.491029	0.666667	0.545455	0.666667	0.428571	0.2	0.444444	0.666667	0.5	0.666667	0.555556
0.382522	0.884494	1	0.636364	0.666667	0.428571	0.8	0.444444	0.666667	0.333333	0.833333	0.666667
0.25907	0.877867	0.666667	0.636364	0.666667	0.428571	0.8	0.444444	0.666667	0.5	0.833333	0.666667
0.301825	0.335559	1	0.636364	0.833333	0.428571	0.2	0.222222	0.5	0.5	0.5	0.444444
0.310221	0.747732	1	0.636364	0.666667	0.428571	0.7	0.444444	0.5	0.5	0.833333	0.666667
0.439508	0.801764	1	0.636364	0.833333	0.571429	0.8	0.333333	0.666667	0.5	1	0.666667
0.392393	0.279233	1	0.272727	0.666667	0.428571	0.2	0.444444	0.5	0.5	0.666667	0.555556
0.322787	0.667703	1	0.454545	0.833333	0.428571	0.6	0.222222	0.5	0.5	1	0.666667
0.291981	0.509073	1	0.545455	0.833333	0.571429	0.1	0.333333	0.5	0.333333	0.666667	0.555556
0.182021	0.7801	1	0.545455	0.833333	0.428571	0.7	0.222222	0.666667	0.333333	1	0.666667
0.260746	0.743756	0.666667	0.545455	0.833333	0.428571	0.7	0.222222	0.5	0.5	1	0.888889
0.235774	0.669385	1	0.454545	0.666667	0.571429	0.6	0.222222	0.666667	0.5	1	0.666667
0.335877	0.713274	0.666667	0.818182	0.833333	0.428571	0.8	0.333333	0.666667	0.5	1	0.666667
0.320052	0.838261	1	0.727273	0.833333	0.571429	0.6	0.333333	0.5	0	1	0.666667
0.200515	0.796513	1	0.545455	0.833333	0.428571	0.8	0.222222	0.5	0.5	1	0.666667
0.336963	0.593231	1	0.272727	0.666667	0.428571	0.8	0.222222	0.666667	0.5	1	0.666667
0.293966	0.380008	1	0.454545	0.833333	0.428571	0.3	0.333333	0.5	0.333333	1	0.666667
0.326315	0.56703	0.666667	0.272727	0.833333	0.428571	0.6	0.333333	0.666667	0.5	1	0.666667
0.247804	0.47069	1	0.454545	0.666667	0.428571	0.2	0.222222	0.5	0.5	1	0.666667
0.27287	0.620451	0.666667	0.363636	0.833333	0.428571	0.7	0.333333	0.666667	0.333333	1	0.666667
0.24425	0.809257	0.666667	0.363636	0.833333	0.428571	0.8	0.222222	0.666667	0.5	1	0.666667
0.191462	0.566572	0.666667	0.363636	0.833333	0.428571	0.7	0.222222	0.666667	0.5	1	0.666667
0.095342	0.690132	1	0.545455	0.5	0.428571	0.8	0.222222	0.833333	0.5	1	0.666667
0.16083	0.674992	1	0.545455	0.833333	0.428571	0.8	0.222222	0.5	0.5	1	0.666667
0.242868	0.691967	1	0.636364	0.666667	0.428571	0.7	0.222222	0.833333	0.666667	0.833333	0.666667
0.175462	0.479763	1	0.454545	0.833333	0.428571	0	0.333333	0.5	0.5	0.5	0.444444
0.219908	0.780559	0.666667	0.545455	0.833333	0.428571	0.8	0.333333	0.5	0.333333	0.833333	0.666667
0.277027	0.639973	1	0.545455	0.833333	0.428571	0.6	0.222222	0.666667	0.5	1	0.666667
0.186688	0.738404	1	0.545455	0.5	0.571429	0.5	0.444444	0.5	0.5	1	0.666667
0.226801	0.806351	1	0.636364	0.666667	0.428571	0.6	0.444444	0.5	0.333333	0.833333	0.666667
0.246355	0.69477	1	0.545455	0.5	0.571429	0.7	0.444444	0.5	0.333333	1	0.666667
0.218299	0.539861	1	0.545455	0.5	0.571429	0.2	0.333333	0.666667	0.5	0.666667	0.444444
0.2323	0.676624	0.666667	0.454545	0.666667	0.428571	0.7	0.555556	0.666667	0	1	0.555556
0.320387	0.321439	0.666667	0.454545	0.666667	0.571429	0.2	0.222222	0.666667	0.5	0.666667	0.555556
0.249373	0.287695	1	0.272727	0.666667	0.571429	0.2	0.444444	0.5	0.333333	0.666667	0.444444
0.275391	0.355643	1	0.363636	0.666667	0.571429	0.2	0.333333	0.666667	0.5	0.5	0.555556
0.290291	0.568967	0.666667	0.272727	0.666667	0.571429	0.8	0.444444	0.5	0.5	0.833333	0.666667
0.232716	0.610052	1	0.454545	0.666667	0.714286	0.7	0.555556	0.666667	0	1	0.666667
0.222188	0.319502	1	0.545455	0.5	0.571429	0.2	0.444444	0.666667	0	0.666667	0.444444
0.230423	0.437048	1	0.454545	0.5	0.571429	0.3	0.444444	0.5	0.166667	0.666667	0.666667
0.221705	0.404475	1	0.363636	0.666667	0.571429	0.2	0.444444	0.666667	0.5	0.666667	0.666667
0.242332	0.913141	1	0.454545	0.666667	0.571429	0.6	0.444444	0.666667	0.5	1	0.666667
0.307954	0.63559	0.666667	0.454545	0.5	0.428571	0.8	0.333333	0.666667	0.5	0.833333	0.777778
0.295669	0.653125	0.666667	0.454545	0.666667	0.571429	0.5	0.444444	0.5	0.5	1	0.666667
0.209554	0.699154	1	0.545455	0.666667	0.714286	0.6	0.444444	0.5	0.5	1	0.555556
0.155184	0.422928	0.666667	0.727273	0.833333	0.428571	0.2	0.444444	0.333333	0.166667	0.666667	0.444444
0.211271	0.592925	0.666667	0.545455	0.5	0.571429	0.8	0.333333	0.333333	0	1	0.666667
0.198785	0.39897	1	0.636364	0.666667	0.714286	0.2	0.333333	0.333333	0	0.666667	0.555556
0.311817	0.350596	0.666667	0.454545	0.666667	0.714286	0.2	0.333333	0.5	0.333333	0.5	0.333333
0.177246	0.619074	0.666667	0.454545	0.666667	0.571429	0.6	0.555556	0.5	0.166667	1	0.666667
0.148358	0.308594	1	0.454545	0.666667	0.571429	0.1	0.444444	0.333333	0	0.5	0.444444
0.19743	0.375217	0.666667	0.454545	0.666667	0.428571	0.3	0.333333	0.333333	0.166667	1	0.666667
0.222979	0.281884	1	0.454545	0.5	0.571429	0.1	0.444444	0.5	0.166667	0.5	0.444444
0.255381	0.311805	0.666667	0.454545	0.666667	0.571429	0.1	0.222222	0.333333	0.166667	0.5	0.666667
0.175932	0.696911	1	0.545455	0.666667	0.571429	0.9	0.333333	0.5	0.5	1	0.555556
0.081059	0.333571	1	0.363636	0.5	0.285714	0.5	0.444444	0.333333	0.166667	1	0.666667
0.211244	0.253237	0.666667	0.272727	0.833333	0.571429	0.2	0.222222	0.333333	0.166667	0.5	0.444444
0.290828	0.346417	0.666667	0.454545	0.5	0.571429	0.1	0.444444	0.333333	0.5	0.5	0.333333
0.200421	0.356305	0.666667	0.636364	0.5	0.571429	0.2	0.444444	0.333333	0.166667	0.5	0.555556
0.231911	0.377663	0.666667	0.454545	0.5	0.571429	0.1	0.555556	0.5	0.166667	0.333333	0.444444
0.249668	0.623254	0.666667	0.636364	0.666667	0.714286	0.2	0.333333	0.333333	0.5	1	0.777778
0.282338	0.606127	1	0.363636	0.666667	0.571429	0.7	0.444444	0.333333	0.5	0.833333	0.666667
0.260437	0.346569	0.666667	0.454545	0.666667	0.428571	0.2	0.333333	0.5	0.166667	0.5	0.555556
0.251076	0.378581	0.666667	0.454545	0.666667	0.571429	0	0.333333	0.5	0.333333	0.5	0.444444
0.176991	0.57014	0.666667	0.545455	0.666667	0.428571	0.6	0.555556	0.5	0.166667	1	0.666667
0.347062	0.385411	0.666667	0.454545	0.666667	0.428571	0.3	0.444444	0.333333	0.166667	0.666667	0.666667
0.25746	0.347742	0.666667	0.363636	0.666667	0.428571	0.6	0.222222	0.333333	0.166667	1	0.666667
0.162735	0.462432	0.666667	0.545455	0.666667	0.571429	0.3	0.444444	0.5	0.5	1	0.666667
0.223194	0.329391	0.666667	0.545455	0.666667	0.571429	0.1	0.555556	0.333333	0	0.5	0.444444
0.199751	0.392599	0.666667	0.545455	0.666667	0.428571	0.2	0.555556	0.333333	0.166667	0.5	0.444444
0.214999	0.391477	0.666667	0.545455	0.5	0.571429	0.2	0.555556	0.5	0.166667	0.666667	0.666667
0.162212	0.354419	0.666667	0.545455	0.666667	0.428571	0.2	0.555556	0.5	0.166667	0.5	0.444444
0.09954	0.353043	0.666667	0.545455	0.666667	0.428571	0.1	0.555556	0.333333	0	0.666667	0.444444
0.142028	0.383729	1	0.454545	0.5	0.571429	0.2	0.555556	0.333333	0.166667	0.666667	0.555556
0.146011	0.333775	1	0.454545	0.666667	0.428571	0.2	0.555556	0.333333	0.166667	0.5	0.666667
0.222926	0.365787	0.666667	0.454545	0.666667	0.571429	0.1	0.555556	0.5	0.333333	0.666667	0.444444
0.200367	0.609644	0.666667	0.545455	0.833333	0.571429	0.7	0.333333	0.333333	0	1	0.666667
0.190443	0.335406	0.666667	0.454545	0.833333	0.428571	0.2	0.555556	0.333333	0	0.666667	0.444444
0.232944	0.32618	0.666667	0.545455	0.833333	0.571429	0.1	0.555556	0.333333	0.166667	0.666667	0.333333
0.186393	0.573555	0.666667	0.363636	0.666667	0.714286	0.7	0.555556	0.5	0	1	0.666667
0.081099	0.328576	0.666667	0.545455	0.5	0.428571	0.1	0.444444	0.5	0.166667	0.5	0.444444
0.213926	0.26333	0.666667	0.272727	0.666667	0.428571	0.2	0.444444	0.5	0	0.666667	0.555556
0.30613	0.328831	1	0.454545	0.833333	0.571429	0.2	0.555556	0.333333	0.166667	0.5	0.555556
0.236377	0.279488	0.666667	0.363636	0.666667	0.571429	0.2	0.555556	0.333333	0	0.666667	0.555556
0.238563	0.348659	0.666667	0.454545	0.666667	0.571429	0.2	0.555556	0.5	0	0.666667	0.555556
0.217092	0.331736	1	0.454545	0.833333	0.571429	0.1	0.555556	0.5	0.5	0.5	0.444444
0.141746	0.293812	1	0.363636	0.666667	0.571429	0.2	0.555556	0.333333	0.5	0.666667	0.222222
0.175328	0.656693	0.666667	0.727273	0.833333	0.571429	0.7	0.444444	0.5	0.333333	0.833333	0.666667
0.24024	0.354114	1	0.545455	0.833333	0.428571	0.2	0.555556	0.333333	0	0.5	0.444444
0.189357	0.336375	1	0.454545	0.666667	0.571429	0.2	0.222222	0.333333	0	0.5	0.444444
0.202862	0.501274	0.666667	0.545455	0.666667	0.571429	0.5	0.333333	0.5	0.5	1	0.666667
0.26831	0.583852	1	0.545455	0.5	0.428571	0.7	0.444444	0.5	0.5	0.666667	0.555556
0.246986	0.530839	1	0.454545	0.666667	0.571429	0.3	0.444444	0.333333	0.166667	0.833333	0.666667
0.234379	0.316036	1	0.545455	0.5	0.571429	0.2	0.555556	0.5	0	0.5	0.333333
0.264448	0.292385	1	0.454545	0.5	0.428571	0.2	0.555556	0.333333	0	0.5	0.444444
0.29343	0.681415	1	0.545455	0.666667	0.428571	0.7	0.555556	0.5	0.333333	1	0.666667
0.21111	0.452085	1	0.181818	0.666667	0.571429	0.5	0.444444	0.5	0	0.666667	0.666667
0.231093	0.441227	1	0.454545	0.666667	0.428571	0.7	0.555556	0.5	0.5	0.5	0.666667
0.199831	0.344378	0.666667	0.545455	0.666667	0.428571	0.2	0.444444	0.5	0	0.5	0.555556
0.244733	0.43353	1	0.363636	0.666667	0.714286	0.3	0.444444	0.5	0.5	0.333333	0.666667
0.20824	0.385004	1	0.545455	0.666667	0.714286	0.1	0.555556	0.333333	0.333333	0.5	0.333333
0.214865	0.373484	1	0.545455	0.833333	0.428571	0.2	0.444444	0.5	0.5	0.5	0.555556
0.237262	0.354368	1	0.545455	0.666667	0.571429	0.2	0.444444	0.5	0	0.5	0.444444
0.250285	0.304618	1	0.272727	0.666667	0.714286	0.3	0.333333	0.5	0	0.5	0.555556
0.221236	0.356764	1	0.454545	0.666667	0.571429	0.2	0.555556	0.333333	0.333333	0.5	0.555556
0.294167	0.303038	0.666667	0.545455	0.833333	0.428571	0.2	0.222222	0.5	0	0.5	0.444444
0.241769	0.373942	1	0.363636	0.666667	0.571429	0.3	0.555556	0.5	0	1	0.666667
0.199321	0.412631	1	0.545455	0.666667	0.571429	0.2	0.222222	0.5	0.5	0.5	0.444444
0.16767	0.408502	1	0.454545	0.666667	0.571429	0.3	0.444444	0.5	0	0.833333	0.777778
0.276035	0.31206	1	0.454545	0.666667	0.714286	0.2	0.333333	0.5	0	0.666667	0.555556
0.209393	0.304924	0.666667	0.454545	0.666667	0.428571	0.2	0.333333	0.5	0	0.5	0.333333
0.207905	0.401111	0.666667	0.545455	0.833333	0.714286	0.3	0.444444	0.5	0.166667	1	0.666667
0.11892	0.431899	0.666667	0.545455	0.5	0.428571	0.3	0.444444	0.5	0.333333	0.666667	0.666667
0.178104	0.410745	1	0.454545	0.666667	0.428571	0.3	0.333333	0.5	0.333333	1	0.666667
0.201347	0.676573	1	0.454545	0.666667	0.428571	0.9	0.333333	0.5	0.5	0.5	0.666667
0.336172	0.326792	1	0.454545	0.833333	0.428571	0.3	0.444444	0.5	0	1	0.666667
0.335609	0.737384	0.666667	0.454545	0.833333	0.428571	1	0.555556	0.5	0	0.666667	0.666667
0.271435	0.364257	0.666667	0.454545	0.666667	0.428571	0.4	0.222222	0.5	0	1	0.666667
0.265735	0.291569	0.666667	0.272727	0.666667	0.428571	0.3	0.444444	0.5	0	0.666667	0.666667
0.224066	0.248853	1	0.181818	0.666667	0.428571	0.2	0.444444	0.666667	0.333333	0.5	0.444444
0.227834	0.504384	1	0.272727	0.666667	0.428571	0.8	0.222222	0.5	0.166667	1	0.666667
0.219921	0.300591	1	0.181818	0.5	0.428571	0.3	0.333333	0.5	0.333333	0.833333	0.666667
0.327696	0.526302	1	0.181818	0.666667	0.428571	0.9	0.222222	0.5	0.666667	1	0.666667
0.235935	0.341574	0.666667	0.363636	0.833333	0.428571	0.7	0.333333	0.5	0.5	1	0.666667
0.189638	0.357427	1	0.272727	0.833333	0.428571	0.4	0.222222	0.5	0.833333	1	0.888889
0.220914	0.604496	0.666667	0.545455	0.666667	0.428571	0	0.333333	0.666667	0.5	0.5	0.333333
0.210922	0.283413	0.666667	0.272727	0.666667	0.428571	0	0.333333	0.5	0.5	0.666667	0.333333
0.253356	0.278724	0.666667	0.272727	0.666667	0.428571	0.1	0.444444	0.666667	1	0.666667	0.555556
0.277779	0.561117	1	0.181818	0.833333	0.428571	0.8	0.222222	0.666667	0.666667	1	0.666667
0.269758	0.379651	1	0.272727	0.666667	0.428571	0.3	0.333333	0.5	1	1	0.666667
0.280327	0.577837	1	0.272727	0.833333	0.428571	0.7	0.222222	0.5	0.5	1	0.666667
0.265131	0.522275	1	0.545455	0.833333	0.428571	0.3	0.333333	0.333333	0.833333	1	0.777778
0.269437	0.553777	0.666667	0.272727	0.833333	0.428571	0.8	0.333333	0.5	0.5	1	0.888889
0.26823	0.280406	1	0.272727	0.666667	0.428571	0	0.333333	0.5	0.666667	0.666667	0.666667
0.285396	0.335508	0.666667	0.272727	0.833333	0.428571	0.3	0.444444	0.333333	0.5	0.833333	0.777778
0.242855	0.49949	0.666667	0.272727	0.833333	0.428571	0.3	0.222222	0.5	0.666667	1	0.666667
0.280514	0.317667	1	0.272727	0.833333	0.428571	0.5	0.222222	0.5	0.666667	1	0.666667
0.238604	0.327607	1	0.272727	0.833333	0.428571	0.3	0.333333	0.5	0.5	0.666667	0.666667
0.332471	0.51886	1	0.272727	0.666667	0.428571	0.6	0.333333	0.5	0.5	0.666667	0.666667
0.367863	0.265623	0.666667	0.272727	0.833333	0.571429	0	0.555556	0.5	0.666667	0.5	0.555556
0.385996	0.302987	0.666667	0.272727	0.833333	0.428571	0.4	0.222222	0.5	0.666667	0.666667	0.777778
0.219076	0.333163	0.666667	0.272727	0.833333	0.428571	0.2	0.333333	0.333333	0.666667	0.5	0.777778
0.216703	0.309665	0.666667	0.363636	0.833333	0.428571	0.2	0.333333	0.5	0.666667	0.5	0.666667
0.314673	0.312876	0.666667	0.272727	0.666667	0.428571	0.3	0.333333	0.5	0.5	0.5	0.888889
0.26324	0.336426	1	0.454545	0.666667	0.428571	0	0.333333	0.5	0.5	0.666667	0.555556
0.375159	0.330819	0.666667	0.272727	0.833333	0.428571	0.2	0.222222	0.5	0.666667	0.666667	0.777778
0.43417	0.268988	0.666667	0.272727	0.833333	0.428571	0	0.222222	0.5	0.5	0.5	0.333333
0.34721	0.283566	0.666667	0.181818	0.833333	0.428571	0	0.222222	0.333333	0.666667	0.5	0.444444
0.285651	0.257722	0.666667	0.363636	0.833333	0.428571	0	0.333333	0.5	0.666667	0.5	0.444444
0.316699	0.338974	1	0.454545	0.833333	0.428571	0	0.222222	0.333333	0.5	0.5	0.444444
0.34324	0.228464	1	0.181818	0.666667	0.428571	0	0.222222	0.5	0.666667	0.333333	0.333333
0.248863	0.573504	0.666667	0.272727	0.666667	0.428571	0.4	0.333333	0.333333	0.666667	1	0.666667
0.303636	0.387756	1	0.454545	0.666667	0.428571	0.2	0.222222	0.5	0.666667	1	0.666667
0.352132	0.611173	0.666667	0.636364	1	0.428571	0.3	0.555556	0.5	0.5	0.5	0.777778
0.313976	0.389336	0.666667	0.636364	0.833333	0.571429	0	0.555556	0.5	0.5	0.666667	0.333333
0.326315	0.301203	0.666667	0.454545	0.833333	0.571429	0	0.777778	0.5	0.666667	0.666667	0.333333
0.280085	0.644459	1	0.545455	0.833333	0.428571	0.5	0.777778	0.5	0.5	1	0.666667
0.303783	0.244214	1	0.363636	0.666667	0.285714	0	0.888889	0.5	0.666667	0.5	0.444444
0.408742	0.384188	0.666667	0.545455	0.833333	0.571429	0	0.555556	0.5	0.5	0.5	0.444444
0.481244	0.290397	0.666667	0.363636	0.833333	0.571429	0	0.333333	0.5	0.666667	0.5	0.333333
0.390287	0.46595	1	0.545455	0.833333	0.428571	0.3	0.333333	0.666667	0.666667	0.666667	0.666667
0.378807	0.256703	1	0.363636	0.666667	0.571429	0	0.222222	0.333333	0.5	0.5	0.444444
0.33577	0.467275	1	0.363636	0.5	0.285714	0.5	0.333333	0.333333	0.833333	0.666667	0.666667
0.316377	0.589	1	0.454545	0.666667	0.428571	0.5	0.333333	0.666667	0.666667	0.666667	0.666667
0.378298	0.26542	1	0.363636	0.833333	0.428571	0	0.111111	0.333333	0.666667	0.666667	0.333333
0.359361	0.570802	1	0.454545	0.833333	0.714286	0.5	0.333333	0.666667	0.666667	0.666667	0.666667
0.374811	0.625344	1	0.636364	0.833333	0.571429	0.4	0.333333	0.5	0.666667	0.333333	0.666667
0.294825	0.240188	1	0.363636	0.5	0.285714	0	0.555556	0.666667	0.666667	0.666667	0.444444
0.26033	0.517178	1	0.363636	0.666667	0.428571	0.4	0.222222	0.5	0.5	1	0.666667
0.326623	0.494291	1	0.363636	0.833333	0.714286	0.5	0.333333	0.5	0.666667	0.666667	0.666667
0.295884	0.482924	1	0.272727	0.666667	0.428571	0.7	0.333333	0.5	0.666667	1	0.666667
0.229028	0.472117	1	0.363636	0.5	0.285714	0.6	0.333333	0.5	0.5	1	0.666667
0.181913	0.510144	1	0.363636	0.833333	0.428571	0.5	0.333333	0.5	0.5	1	0.666667
0.225058	0.219441	1	0.363636	0.5	0.428571	0	0.222222	0.666667	0.5	0.5	0.444444
0.219023	0.24187	1	0.363636	0.833333	0.428571	0	0.333333	0.5	0.5	0.666667	0.333333
0.215522	0.475839	1	0.272727	0.5	0.285714	0.5	0.333333	0.5	0.666667	1	0.777778
0.202205	0.605515	0.666667	0.545455	0.833333	0.571429	0.6	0.444444	0.5	0.5	1	0.888889
0.168395	0.522836	1	0.363636	0.666667	0.285714	0.8	0.333333	0.5	0.5	1	0.666667
0.240293	0.478795	0.666667	0.363636	0.5	0.285714	0.7	0.333333	0.5	0.833333	1	0.666667
0.179821	0.204047	1	0.272727	0.666667	0.285714	0.1	0.333333	0.5	0.666667	0.333333	0.444444
0.250728	0.470843	1	0.363636	0.666667	0.285714	0.6	0.333333	0.5	0.666667	1	0.666667
0.251143	0.242991	1	0.272727	0.666667	0.571429	0.2	0.333333	0.666667	0.666667	0.5	0.444444
0.259928	0.240595	1	0.363636	0.5	0.285714	0.1	0.333333	0.5	0.5	0.5	0.444444
0.296192	0.704812	1	0.636364	0.833333	0.428571	0.1	0.333333	0.5	0.666667	0.5	0.444444
0.274895	0.201703	1	0.272727	0.5	0.285714	0	0.444444	0.5	1	0.5	0.444444
0.220082	0.277092	1	0.272727	0.5	0.285714	0.4	0.444444	0.666667	0.666667	0.666667	0.666667
0.318174	0.471965	1	0.272727	0.666667	0.428571	0.7	0.333333	0.5	0.833333	1	0.666667
0.275096	0.362575	1	0.454545	0.666667	0.571429	0.1	0.444444	0.5	0.833333	0.5	0.444444
0.21685	0.237588	0.666667	0.363636	0.333333	0.285714	0.2	0.444444	0.5	0.666667	0.5	0.444444
0.160737	0.243042	1	0.454545	0.666667	0.142857	0.2	0.444444	0.666667	0.833333	0.5	0.444444
0.143771	0.346926	1	0.454545	0.666667	0.428571	0.2	0.444444	0.666667	0.5	0.5	0.444444
0.206644	0.117137	0	0	0	0.142857	0.3	0.333333	0.333333	0	1	0.666667
0.163285	0.668876	1	0.363636	0.833333	0.571429	0.6	0.222222	0.5	0.666667	1	0.666667
0.181551	0.177592	0.666667	0.272727	0.5	0.285714	0.1	0.333333	0.666667	1	0.5	0.222222
0.145877	0.250382	1	0.454545	0.5	0.285714	0.2	0.444444	0.5	0.833333	0.5	0.444444
0.141692	0.436844	1	0.363636	0.5	0.285714	0.7	0.222222	0.5	0.666667	1	0.666667
0.179553	0.181364	1	0.272727	0.5	0.285714	0.2	0.222222	0.5	0.5	0.333333	0.444444
0.211942	0.360179	0.666667	0.545455	0.666667	0.571429	0.2	0.444444	0.5	0.5	0.5	0.444444
0.17443	0.397033	0.666667	0.363636	0.5	0.428571	0.3	0.444444	0.5	0.5	1	0.888889
0.185534	0.533999	0.666667	0.454545	0.666667	0.285714	0.6	0.333333	0.666667	0.666667	1	0.666667
0.231428	0.201499	1	0.454545	0.666667	0.285714	0.1	0.222222	0.5	0	0.333333	0.444444
0.249547	0.193292	0.666667	0.272727	0.5	0.285714	0	0.444444	0.5	0.666667	0.5	0.222222
0.286429	0.197013	1	0.272727	0.5	0.285714	0.2	0.222222	0.5	0.5	0.5	0.444444
0.348336	0.231063	1	0.363636	0.333333	0.285714	0.2	0.444444	0.666667	0.666667	0.5	0.555556
0.323726	0.434907	1	0.636364	0.833333	0.714286	0.2	0.333333	0.5	0.5	0.5	0.555556
0.300659	0.295596	0	0	0	0.142857	0.8	0.333333	0.166667	0	1	0.555556
0.372155	0.675043	1	0.636364	0.666667	0.571429	0	0	0.833333	0.5	0	0
0.331572	0.391885	1	0.636364	0.666667	0.714286	0.1	0.222222	0.666667	0.5	0.333333	0.333333
0.374958	0.654093	1	0.636364	0.833333	0.571429	0.3	0.333333	0.666667	0.5	0.666667	0.666667
0.27688	0.217046	1	0.272727	0.5	0.142857	0.1	0.333333	0.666667	0.5	0.5	0.333333
0.311803	0.169691	1	0.363636	0.5	0	0.1	0.111111	0.666667	0.5	0.5	0.444444
0.229578	0.457641	1	0.363636	0.5	0.285714	0.7	0.333333	0.5	0.666667	1	0.666667
0.240334	0.443164	1	0.363636	0.5	0.285714	0.6	0.333333	0.666667	0.5	0.833333	0.666667
0.28089	0.545112	1	0.363636	0.833333	0.714286	0.7	0.222222	0.666667	0.5	1	0.666667
0.303435	0.23611	0.666667	0.363636	0.833333	0.428571	0	0	0.833333	0.5	0.333333	0.222222
0.328367	0.209094	1	0.363636	0.833333	0.428571	0	0	0.666667	0.5	0	0.222222
0.367273	0.128912	1	0.363636	0.5	0	0	0	0.666667	0.5	0	0.222222
0.306895	0.210878	1	0.363636	0.833333	0.285714	0	0	0.666667	0.5	0	0.222222
0.30884	0.194872	1	0.363636	0.833333	0.285714	0	0	0.666667	0.5	0	0.222222
0.238443	0.263228	0	0	0	0	0.6	0.222222	0.166667	0	1	0.555556
0.324906	0.140993	1	0.272727	0.5	0.142857	0	0	0.666667	0.5	0	0.222222
0.27067	0.2932	0	0	0	0	0.5	0.444444	0.166667	0	0.666667	0.555556
0.262302	0.124936	1	0.272727	0.5	0.142857	0	0	0.666667	0.166667	0	0.222222
0.282674	0.234631	1	0.545455	0.666667	0.428571	0	0	0.833333	0.333333	0	0.222222
0.254925	0.114181	1	0.363636	0.5	0.142857	0	0	0.666667	0.666667	0	0
0.344782	0.102151	0	0	0	0	0.3	0.333333	0.166667	0	0.833333	0.666667
0.302965	0.191661	1	0.363636	0.666667	0.571429	0	0	0.833333	0.5	0	0.222222
0.269812	0.127638	1	0.363636	0.5	0.142857	0	0	0.833333	0.5	0	0.222222
0.341443	0.253594	1	0.363636	0.666667	0.285714	0.4	0.222222	0.666667	0.5	0.666667	0.666667
0.421536	0.08849	1	0	0.166667	0	0	0	0.666667	0.5	0	0.222222
0.346794	0.21781	1	0.363636	0.5	0.142857	0.3	0.333333	0.666667	0.333333	0.833333	0.666667
0.322613	0.291263	1	0.545455	0.666667	0.142857	0.3	0.444444	0.666667	0.333333	0.833333	0.666667
0.229672	0.219696	1	0.363636	0.5	0.142857	0.2	0.444444	0.666667	0.333333	0.833333	0.666667
0.311066	0.257672	0	0	0	0	0.5	0.333333	0.166667	0	0.333333	0.666667
0.283787	0.241972	1	0.363636	0.5	0.285714	0.4	0.222222	0.666667	0.5	0.666667	0.666667
0.300337	0.275971	0	0	0	0	0.6	0.333333	0.166667	0	1	0.555556
0.301369	0.106382	0	0	0	0.142857	0.2	0.333333	0.166667	0	1	0.555556
0.258922	0.478795	1	0.545455	0.666667	0.571429	0	0	0.833333	0.5	0	0.222222
0.255448	0.656336	1	0.636364	0.666667	0.428571	0.3	0.333333	0.666667	0.333333	0.666667	0.666667
0.304883	0.119023	0.666667	0.363636	0.5	0.142857	0	0	0.833333	0.5	0	0
0.350804	0.290753	1	0.545455	0.666667	0.285714	0	0	0.666667	0.333333	0	0.222222
0.378794	0.582985	1	0.454545	0.666667	0.428571	0.6	0.222222	0.666667	0.666667	0.833333	0.666667
0.323069	0.331991	1	0.636364	0.833333	0.428571	0	0.222222	0.666667	0.333333	0.5	0.444444
0.342717	0.161637	1	0.363636	0.833333	0.428571	0	0	0.833333	0.5	0	0.222222
0.263656	0.19319	1	0.363636	0.666667	0.428571	0	0.222222	0.833333	0.333333	0.5	0.333333
0.272494	0.29213	0	0	0	0.142857	0.5	0.333333	0.333333	0	0.833333	0.555556
0.256226	0.213987	1	0.363636	0.5	0.285714	0.2	0.222222	0.833333	0.5	0.666667	0.666667
0.216032	0.51779	1	0.363636	0.666667	0.428571	0.5	0.333333	0.5	0.666667	0.666667	0.666667
0.219935	0.599755	1	0.545455	0.666667	0.285714	0.6	0.444444	0.5	0.666667	0.833333	0.666667
0.313721	0.130034	0	0	0	0.142857	0.3	0.333333	0.166667	0	1	0.666667
0.216904	0.160567	1	0.363636	0.5	0.285714	0	0.222222	0.833333	0.166667	0.5	0.222222
0.194922	0.441024	1	0.545455	0.5	0.285714	0.5	0.333333	0.666667	0.833333	0.5	0.666667
0.172485	0.439036	1	0.363636	0.5	0.285714	0.8	0.444444	0.666667	0.5	1	0.666667
0.104301	0.473341	0.666667	0.363636	0.666667	0.285714	0.3	0.444444	0.666667	0.666667	0.833333	0.666667
0.182544	0.232745	1	0.363636	0.5	0.142857	0.4	0.222222	0.5	0.333333	0.833333	0.666667
0.151469	0.164747	1	0.363636	0.5	0.285714	0	0.222222	0.666667	0.666667	0.5	0.333333
0.202218	0.183862	1	0.363636	0.5	0.285714	0	0.444444	0.833333	0.5	0.333333	0.333333
0.051929	0.146855	1	0.363636	0.5	0.142857	0	0.111111	0.833333	0.333333	0.333333	0.222222
0.180505	0.21363	1	0.363636	0.666667	0.428571	0	0.333333	0.666667	0.333333	0.5	0.444444
0.320856	0.290753	0	0	0	0	0.4	0.444444	0.166667	0	0.666667	0.555556
0.276732	0.204965	0.666667	0.454545	0.666667	0.428571	0	0.222222	0.666667	0.5	0.5	0.222222
0.299076	0.250637	1	0.545455	0.666667	0.428571	0	0	0.666667	0.833333	0	0.222222
0.232595	0.294729	0.666667	0.454545	0.833333	0.428571	0.3	0.333333	0.666667	0.333333	0.666667	0.666667
0.241594	0.270568	1	0.454545	0.666667	0.428571	0.3	0.444444	0.666667	0.333333	0.5	0.666667
0.226305	0.104547	0	0	0	0.142857	0.5	0.333333	0.333333	0	1	0.555556
0.165136	0.23667	1	0.454545	0.5	0.285714	0.3	0.333333	0.5	0.333333	0.5	0.777778
0.284954	0.502804	1	0.454545	0.666667	0.285714	0.7	0.333333	0.666667	0.666667	0.833333	0.777778
0.313104	0.213528	1	0.363636	0.666667	0.428571	0.2	0.444444	0.666667	0.5	0.5	0.555556
0.254013	0.488174	1	0.363636	0.666667	0.285714	0.6	0.444444	0.666667	0.333333	0.833333	0.888889
0.274251	0.278418	1	0.363636	0.666667	0.428571	0.3	0.666667	0.666667	0.5	0.666667	0.777778
0.236109	0.221939	1	0.363636	0.666667	0.428571	0	0.444444	0.5	1	0.5	0.333333
0.178627	0.253441	1	0.272727	0.5	0.285714	0.2	0.333333	0.5	0.5	0.833333	0.666667
0.14939	0.234937	1	0.363636	0.5	0.285714	0.4	0.333333	0.666667	0.666667	0.666667	0.777778
0.095597	0.3534	1	0.454545	0.833333	0.428571	0.4	0.333333	0.666667	0.5	0.5	0.777778
0.135362	0.153991	1	0.454545	0.666667	0.285714	0	0.222222	0.666667	0.333333	0.333333	0.333333
0.212746	0.200989	1	0.363636	0.5	0.285714	0	0.333333	0.833333	0.666667	0.5	0.555556
0.106742	0.270058	1	0.454545	0.5	0.285714	0.3	0.222222	0.833333	0.5	0.666667	0.777778
0.146614	0.275767	1	0.272727	0.666667	0.428571	0.3	0.333333	0.5	0.5	0.666667	0.666667
0.168046	0.169997	1	0.363636	0.666667	0.285714	0	0.111111	0.666667	0.5	0.666667	0.333333
0.236216	0.093027	0	0	0	0.142857	0.2	0.222222	0.333333	0	0.666667	0.555556
0.112563	0.255887	1	0.363636	0.5	0.285714	0.2	0.222222	0.833333	0.666667	1	0.666667
0.115178	0.596493	1	0.363636	0.666667	0.428571	0.6	0.222222	0.666667	0.5	0.666667	0.666667
0.12867	0.213834	1	0.363636	0.5	0.285714	0.4	0.222222	0.666667	0.666667	0.666667	0.666667
0.196894	0.186563	1	0.363636	0.666667	0.428571	0	0	0.666667	0.5	0	0.222222
0.177246	0.105821	1	0.363636	0.5	0.142857	0	0	0.666667	0.5	0	0
0.163459	0.216689	1	0.272727	0.666667	0.571429	0	0.222222	0.666667	0.5	0.5	0.444444
0.136904	0.182689	1	0.363636	0.5	0.285714	0.1	0.222222	0.666667	0.666667	0.666667	0.444444
0.187962	0.337751	1	0.363636	0.666667	0.428571	0.2	0.333333	0.5	0.5	1	0.666667
0.188404	0.171985	0.666667	0.363636	0.666667	0.285714	0	0.333333	0.666667	0.5	0.5	0.333333
0.15163	0.262565	1	0.545455	0.666667	0.428571	0	0.222222	0.666667	0.833333	0.5	0.222222
0.142095	0.240595	0.666667	0.363636	0.5	0.285714	0.6	0.222222	0.833333	0.333333	1	0.777778
0.201722	0.490825	1	0.454545	0.5	0.285714	0.7	0.333333	0.666667	0.333333	1	0.666667
0.120113	0.231318	1	0.363636	0.5	0.285714	0.2	0.222222	0.5	0.166667	0.5	0.666667
0.103188	0.327047	1	0.272727	0.666667	0.428571	0.3	0.444444	0.5	0.833333	1	0.666667
0.073066	0.244367	1	0.363636	0.666667	0.285714	0.2	0.222222	0.666667	0.5	0.833333	0.666667
0.072596	0.221684	0.666667	0.363636	0.666667	0.428571	0	0.333333	0.5	0.333333	0.5	0.333333
0.177313	0.374146	0.666667	0.363636	0.833333	0.571429	0.3	0.444444	0.5	0.5	1	0.666667
0.174872	0.106025	0	0	0	0.142857	0.3	0.333333	0.333333	0	1	0.666667
0.158202	0.237486	1	0.363636	0.5	0.285714	0.3	0.444444	0.5	0.166667	1	0.666667
0.072248	0.3063	1	0.454545	0.833333	0.428571	0.3	0.222222	0.666667	0.5	0.666667	0.555556
0.118437	0.315985	1	0.363636	0.666667	0.428571	0.3	0.222222	0.5	0.5	1	0.777778
0.149189	0.429758	0	0	0	0.142857	0.5	0.444444	0.333333	0	0.833333	0.555556
0.109572	0.329544	1	0.363636	0.666667	0.428571	0.3	0.222222	0.5	0.666667	1	0.888889
0.062457	0.141095	1	0.272727	0.666667	0.285714	0	0	0.833333	0.5	0	0.222222
0.095932	0.294627	1	0.545455	0.666667	0.428571	0.5	0.222222	0.5	0.5	1	0.666667
0.049931	0.269294	1	0.454545	0.666667	0	0.3	0.555556	0.666667	0.5	1	0.777778
0.137441	0.227189	0.666667	0.363636	0.5	0.428571	0	0.222222	0.666667	0	0.5	0.333333
0.179311	0.165562	1	0.363636	0.666667	0.428571	0	0	0.666667	0.666667	0	0.222222
0.296944	0.290957	0	0	0	0.142857	0.7	0.222222	0.333333	0	0.5	0.555556
0.35016	0.119125	0	0	0	0.142857	0.3	0.333333	0.333333	0	1	0.555556
0.250821	0.161739	0.666667	0.363636	0.666667	0.285714	0	0	0.5	0.5	0	0.222222
0.312782	0.300795	0.666667	0.363636	0.666667	0.428571	0.3	0.333333	0.5	0.166667	0.833333	0.666667
0.32429	0.257162	0.666667	0.636364	0.833333	0.428571	0	0	0.666667	0.666667	0	0.222222
0.331009	0.254409	0.666667	0.727273	0.666667	0.428571	0	0	0.5	0.666667	0	0.222222
0.266593	0.095626	0	0	0	0	0.2	0.444444	0.166667	0	0.833333	0.555556
0.313225	0.276328	0.666667	0.272727	0.666667	0.285714	0.3	0.222222	0.666667	0.5	0.833333	0.666667
0.307686	0.212509	0.666667	0.090909	0.333333	0	0.3	0.333333	0.5	0.5	1	0.666667
0.267251	0.256295	1	0.545455	0.833333	0.285714	0	0	0.5	0.5	0	0.222222
0.197189	0.202314	1	0.363636	0.833333	0.428571	0	0.222222	0.5	0.333333	0.5	0.444444
0.214315	0.318483	1	0.363636	0.666667	0.428571	0.3	0.333333	0.5	0.5	0.833333	0.666667
0.170312	0.139566	0.666667	0.363636	0.5	0.285714	0	0.222222	0.5	0.166667	0.5	0.222222
0.277068	0.104853	0	0	0	0	0.3	0.444444	0.166667	0	0.833333	0.666667
0.201575	0.22515	1	0.363636	0.5	0.142857	0.3	0.444444	0.5	0.166667	0.833333	0.666667
0.217025	0.189265	0.666667	0.363636	0.666667	0.285714	0	0.222222	0.666667	0.5	0.5	0.333333
0.255931	0.193394	1	0.363636	0.666667	0.285714	0	0	0.833333	0.5	0	0.222222
0.214584	0.095015	0	0	0	0	0.2	0.444444	0.166667	0	0.5	0.666667
0.224267	0.273728	1	0.363636	0.666667	0.285714	0.3	0.333333	0.666667	0.5	0.833333	0.666667
0.255784	0.252625	1	0.363636	0.666667	0.428571	0.2	0.222222	0.5	0.5	0.666667	0.666667
0.264863	0.323733	0.666667	0.363636	0.666667	0.428571	0.3	0.222222	0.5	0.5	1	0.666667
0.240119	0.269039	1	0.363636	0.5	0.142857	0.3	0.333333	0.666667	0.666667	1	0.666667
0.275713	0.192272	1	0.363636	0.666667	0.285714	0.2	0.222222	0.5	0.5	0.5	0.666667
0.318925	0.305689	0.666667	0.272727	0.833333	0.714286	0.2	0.333333	0.666667	0.666667	1	0.666667
0.248783	0.227648	0.666667	0.272727	0.666667	0.428571	0	0.222222	0.666667	0.5	0.5	0.444444
0.26084	0.198083	0.666667	0.363636	0.666667	0.428571	0	0	0.666667	0.5	0	0.111111
0.268417	0.131461	0.666667	0.272727	0.5	0	0	0	0.666667	0.666667	0	0.222222
0.235479	0.18376	0.666667	0.363636	0.5	0.142857	0.2	0.222222	0.5	0.166667	0.5	0.666667
0.280085	0.224233	1	0.363636	0.833333	0.285714	0.2	0.222222	0.666667	0.833333	0.166667	0.444444
0.172646	0.225915	1	0.363636	0.5	0.142857	0.3	0.222222	0.5	0.5	0.5	0.777778
0.250982	0.238251	1	0.272727	0.5	0	0.3	0.333333	0.5	0.833333	0.833333	0.666667
0.287193	0.203232	1	0.272727	0.333333	0	0.3	0.222222	0.666667	0.833333	0.333333	0.555556
0.256468	0.156999	0.666667	0.363636	0.5	0	0.2	0.222222	0.666667	0.666667	0.5	0.666667
0.332028	0.229177	1	0.363636	0.333333	0	0.3	0.222222	0.833333	0.666667	0.666667	0.666667
0.341644	0.13559	0.666667	0.181818	0.333333	0	0.2	0.222222	0.666667	0.833333	0.166667	0.555556
0.367126	0.189724	1	0.272727	0.5	0	0.2	0.222222	0.5	0.5	0.5	0.555556
0.399193	0.161535	0.666667	0.363636	0.333333	0	0.1	0.222222	0.5	0.5	0.333333	0.555556
0.338291	0.8272	0.666667	0.636364	0.833333	0.571429	0.4	0.333333	0.5	0.5	0.666667	0.666667
0.349476	0.395963	0.666667	0.636364	0.666667	0.428571	0.2	0.333333	0.5	0.5	0.666667	0.666667
0.299183	0.258793	1	0.272727	0.333333	0	0.3	0.444444	0.5	0.5	0.833333	0.666667
0.322533	0.182893	0.666667	0.363636	0.5	0	0.2	0.222222	0.5	0.666667	0	0.444444
0.359159	0.364053	0.666667	0.545455	0.833333	0.571429	0	0.333333	0.5	0.5	0.833333	0.555556
0.30896	0.214344	0.666667	0.363636	0.333333	0.142857	0.2	0.333333	0.666667	0.5	1	0.555556
0.370908	0.087777	0	0	0	0	0.1	0.444444	0.166667	0	0.833333	0.555556
0.338626	0.242379	1	0.363636	0.5	0	0.3	0.444444	0.666667	0.666667	0.833333	0.666667
0.348819	0.144408	0.666667	0.272727	0.333333	0	0.2	0.222222	0.666667	0.5	0	0.444444
0.318241	0.188042	0.666667	0.272727	0.5	0	0.2	0.222222	0.666667	0.5	0.666667	0.555556
0.288776	0.246101	1	0.272727	0.5	0	0.3	0.444444	0.666667	1	0.666667	0.777778
0.217548	0.238047	1	0.363636	0.5	0	0.3	0.333333	0.5	0.5	0.833333	0.666667
0.313279	0.114334	0	0	0	0	0.3	0.444444	0.166667	0	0.833333	0.666667
0.263039	0.306453	0.666667	0.272727	0.833333	0.428571	0.3	0.333333	0.5	0.666667	1	0.666667
0.209165	0.584361	1	0.272727	0.5	0.142857	0.6	0.444444	0.5	0.5	0.5	0.666667
0.290251	0.743399	0.666667	0.545455	0.833333	0.285714	0.6	0.333333	0.666667	0.5	0.833333	0.666667
0.249775	0.495259	1	0.272727	0.5	0.142857	0.6	0.444444	0.666667	0.5	0.666667	0.666667
0.170527	0.181772	0.666667	0.272727	0.166667	0.142857	0.2	0.444444	0.5	0.5	0.666667	0.444444
0.259485	0.208788	1	0.363636	0.333333	0	0.2	0.444444	0.5	0.5	0.666667	0.666667
0.326207	0.164543	1	0.181818	0.333333	0	0.2	0.222222	0.666667	0.5	0.5	0.666667
0.283076	0.207564	0.666667	0.363636	0.333333	0	0.2	0.333333	0.666667	0.5	0.666667	0.666667
0.204619	0.234275	0.666667	0.272727	0.5	0	0.3	0.222222	0.666667	0.5	0.833333	0.666667
0.298526	0.565909	1	0.272727	0.333333	0	0.7	0.444444	0.666667	0.666667	0.833333	0.666667
0.191006	0.166939	0.666667	0.181818	0.166667	0	0.1	0.222222	0.5	0.5	0.5	0.444444
0.279374	0.145479	0.666667	0.272727	0.5	0	0.2	0.222222	0.5	0.5	0.333333	0.444444
0.232756	0.733357	0.666667	0.545455	0.666667	0.428571	0.6	0.222222	0.666667	0.5	0.833333	0.666667
0.281641	0.711286	0.666667	0.454545	0.666667	0.428571	0.6	0.444444	0.666667	0.5	0.666667	0.666667
0.324531	0.352635	0.666667	0.545455	0.5	0.428571	0.2	0.222222	0.5	0.5	0.333333	0.555556
0.257366	0.332144	0.666667	0.545455	0.666667	0.428571	0.2	0.222222	0.666667	0.5	0.333333	0.444444
0.223972	0.219186	0.666667	0.272727	0.666667	0.428571	0.2	0.222222	0.5	0.666667	0.333333	0.444444
0.237584	0.323122	1	0.454545	0.666667	0.428571	0.2	0.222222	0.666667	0.666667	0.333333	0.444444
0.333315	0.256601	0.666667	0.454545	0.666667	0.428571	0.2	0.222222	0.5	0.666667	0.333333	0.444444
0.318777	0.299521	1	0.545455	0.666667	0.142857	0.1	0.222222	0.666667	0.5	0.333333	0.444444
0.298808	0.171475	0.666667	0.272727	0	0	0.2	0.222222	0.666667	0.833333	0.333333	0.333333
0.258681	0.149149	0.666667	0.363636	0.333333	0	0.1	0.222222	0.5	0.5	0.166667	0.444444
0.26379	0.153532	0.666667	0.272727	0.166667	0	0.2	0.222222	0.5	0.5	0.333333	0.444444
0.29866	0.178357	1	0.363636	0.5	0	0.2	0.222222	0.5	0.5	0.333333	0.444444
0.362056	0.178357	1	0.363636	0.5	0	0.1	0.222222	0.666667	0.5	0.333333	0.444444
0.310744	0.167499	0.666667	0.272727	0.333333	0	0.1	0.222222	0.5	0.666667	0.333333	0.333333
0.305017	0.173718	0.666667	0.272727	0.5	0.142857	0.1	0.222222	0.666667	0.666667	0.5	0.444444
0.2036	0.173718	0.666667	0.272727	0.5	0.142857	0.2	0.222222	0.5	0.5	0.166667	0.444444
0.294489	0.170558	0.666667	0.363636	0.333333	0.142857	0.2	0.222222	0.666667	0.5	0	0.444444
0.229685	0.182536	0.666667	0.363636	0.5	0.142857	0.2	0.222222	0.5	0.5	0.333333	0.555556
0.305272	0.170048	1	0.272727	0.5	0.142857	0.2	0.222222	0.5	0.5	0.333333	0.444444
0.281306	0.162606	0.666667	0.272727	0.333333	0	0.1	0.222222	0.5	0.5	0.333333	0.555556
0.329869	0.314762	0.666667	0.545455	0.666667	0.142857	0.2	0.444444	0.5	0.5	0.833333	0.555556
0.237826	0.32093	1	0.454545	0.666667	0.428571	0.1	0.222222	0.666667	0.666667	0.333333	0.444444
0.344192	0.347334	0.666667	0.454545	0.666667	0.428571	0.1	0.222222	0.5	0.5	0.333333	0.444444
0.388732	0.298909	0.666667	0.454545	0.666667	0.142857	0.2	0.333333	0.5	0.666667	0	0.666667
0.327777	0.191202	0.666667	0.272727	0.666667	0.285714	0.1	0.222222	0.5	0.5	0.333333	0.555556
0.312769	0.656642	1	0.454545	0.5	0.428571	0.6	0.444444	0.5	0.5	0.833333	0.666667
0.360568	0.371852	0.666667	0.545455	0.666667	0.428571	0.2	0.444444	0.666667	0.666667	0.833333	0.555556
0.291217	0.158732	0.666667	0.272727	0.333333	0	0.1	0.222222	0.5	0.833333	0.333333	0.333333
0.295911	0.298603	1	0.545455	0.5	0.428571	0.2	0.222222	0.5	0.333333	0.166667	0.666667
0.323726	0.612397	1	0.545455	0.666667	0.285714	0.6	0.444444	0.5	0.5	0.833333	0.666667
0.398603	0.376746	0.666667	0.636364	0.666667	0.428571	0.2	0.333333	0.5	0.5	0.166667	0.555556
0.366723	0.346875	0.666667	0.454545	0.666667	0.428571	0.1	0.222222	0.666667	0.5	0.166667	0.444444
0.40732	0.51468	0.666667	0.636364	0.666667	0.428571	0.1	0.222222	0.666667	0.5	0.333333	0.444444
0.340933	0.310378	1	0.636364	0.666667	0.428571	0.2	0.222222	0.666667	0.5	0.166667	0.444444
0.347277	0.410745	1	0.636364	0.666667	0.428571	0.2	0.222222	0.666667	0.666667	0.5	0.666667
0.28093	0.432766	1	0.636364	0.666667	0.428571	0.3	0.222222	0.5	0.5	1	0.555556
0.278422	0.407891	0.666667	0.545455	0.666667	0.428571	0.2	0.333333	0.5	0.5	0.5	0.666667
0.355297	0.361709	1	0.454545	0.833333	0.428571	0.3	0.333333	0.666667	0.666667	1	0.666667
0.352521	0.249873	1	0.272727	0.666667	0.428571	0.2	0.222222	0.666667	0.5	0.333333	0.555556
0.244666	0.261647	0.666667	0.363636	0.833333	0.428571	0.1	0.333333	0.666667	0.666667	0.666667	0.444444
0.21229	0.513151	0.666667	0.363636	0.666667	0.285714	0.6	0.333333	0.666667	0.5	0.833333	0.666667
0.311763	0.354725	0.666667	0.454545	0.666667	0.285714	0.2	0.222222	0.666667	0.666667	0.333333	0.555556
0.43712	0.394689	1	0.545455	0.666667	0.428571	0.2	0.222222	0.5	0.5	0.5	0.444444
0.404128	0.276736	0.666667	0.363636	0.833333	0.285714	0.2	0.222222	0.5	0.5	0.5	0.555556
0.41192	0.256856	0.666667	0.454545	0.833333	0.285714	0	0.222222	0.5	0.333333	0.166667	0.333333
0.387189	0.332399	0.666667	0.454545	0.833333	0.285714	0.2	0.222222	0.5	0.666667	0	0.444444
0.455051	0.217708	0.666667	0.545455	0.5	0.142857	0	0.222222	0.5	0.5	0	0.444444
0.297909	0.274187	1	0.363636	0.5	0.428571	0.1	0.222222	0.666667	0.666667	0.333333	0.444444
0.359803	0.18376	0.666667	0.363636	0.666667	0.285714	0.2	0.222222	0.5	0.666667	0.333333	0.444444
0.347652	0.222755	1	0.363636	0.666667	0.428571	0.2	0.222222	0.5	0.666667	0.333333	0.444444
0.208602	0.299674	1	0.454545	0.833333	0.142857	0	0.222222	0.666667	0.5	0.333333	0.333333
0.259807	0.178917	0.666667	0.363636	0.5	0.285714	0	0.333333	0.5	0.5	0.333333	0.444444
0.199469	0.185187	1	0.272727	0.666667	0.285714	0.1	0.222222	0.5	0.5	0.5	0.444444
0.193554	0.181058	1	0.363636	0.5	0.142857	0.1	0.222222	0.5	0.5	0.333333	0.444444
0.250567	0.115506	1	0.272727	0.5	0	0	0.222222	0.5	0	0.166667	0.333333
0.265185	0.171832	1	0.272727	0.5	0.285714	0.1	0.222222	0.5	0.5	0.5	0.444444
0.262959	0.153991	1	0.363636	0.333333	0	0.2	0.222222	0.5	0.5	0.166667	0.444444
0.314741	0.154399	1	0.272727	0.166667	0	0.2	0.222222	0.5	0.666667	0.333333	0.444444
0.211606	0.154909	1	0.363636	0.166667	0.142857	0	0.222222	0.5	0.5	0.333333	0.333333
0.224294	0.169079	0.666667	0.363636	0.333333	0.285714	0.1	0.222222	0.666667	0.5	0.333333	0.444444
0.21917	0.191253	1	0.363636	0.5	0.285714	0	0.222222	0.666667	0.833333	0.333333	0.222222
0.190658	0.142726	0.666667	0.272727	0.333333	0.285714	0	0.222222	0.5	0.5	0.333333	0.222222
0.170379	0.155775	0.666667	0.363636	0.333333	0	0.1	0.222222	0.5	0.5	0.333333	0.444444
0.267921	0.169997	1	0.272727	0.333333	0.142857	0	0.222222	0.5	0.5	0.333333	0.333333
0.197216	0.232593	1	0.363636	0.5	0.428571	0.1	0.222222	0.666667	0.666667	0.5	0.444444
0.169347	0.137833	0.666667	0.181818	0	0	0	0.333333	0.5	0.5	0.5	0.444444
0.199348	0.152768	0.666667	0.181818	0	0.142857	0	0.222222	0.5	0.5	0.333333	0.444444
0.241796	0.167346	0.666667	0.272727	0.333333	0	0	0.222222	0.5	0.666667	0.166667	0.222222
0.185092	0.165002	1	0.363636	0.5	0.142857	0	0.222222	0.5	0.5	0.333333	0.444444
0.14479	0.138444	1	0.363636	0.333333	0.285714	0	0.222222	0.5	0.5	0.166667	0.333333
0.268699	0.168213	1	0.272727	0.5	0.142857	0.1	0.222222	0.5	0.5	0.166667	0.444444
0.217548	0.406311	0.666667	0.363636	0.5	0.142857	0.4	0.444444	0.5	0.5	0.833333	0.444444
0.169588	0.374605	0.666667	0.454545	0.5	0.428571	0	0.222222	0.5	0.5	0	0.444444
0.213122	0.144204	0.666667	0.363636	0.333333	0	0	0.222222	0.5	0.5	0.166667	0.333333
0.272776	0.434856	1	0.545455	0.5	0.428571	0.1	0.222222	0.5	0.5	0	0.444444
0.264716	0.417219	1	0.363636	0.166667	0	0.4	0.333333	0.666667	0.833333	0.666667	0.666667
0.266955	0.144561	1	0.090909	0	0	0.2	0.222222	0.666667	0.5	0.166667	0.555556
0.266567	0.202722	1	0.181818	0.5	0.428571	0	0.222222	0.5	0.5	0.333333	0.444444
0.23391	0.218728	1	0.272727	0.666667	0.714286	0	0.222222	0.5	0.666667	0.333333	0.333333
0.211807	0.144204	0.666667	0.272727	0.333333	0	0	0.222222	0.5	1	0.166667	0.333333
0.25514	0.158783	0.666667	0.181818	0	0	0.2	0.222222	0.5	0.666667	0.333333	0.555556
0.224374	0.179886	0.666667	0.363636	0.5	0.142857	0.2	0.222222	0.5	0.333333	0.5	0.666667
0.203224	0.158375	0.666667	0.181818	0.166667	0	0.1	0.222222	0.5	0.5	0.166667	0.555556
0.220203	0.194617	0.666667	0.363636	0.666667	0.285714	0.2	0.222222	0.5	0.166667	0.333333	0.666667
0.194198	0.161331	1	0.272727	0.333333	0	0	0.222222	0.5	0.5	0.166667	0.444444
0.207087	0.160006	1	0.272727	0.333333	0	0	0.222222	0.666667	0.666667	0.333333	0.444444
0.233306	0.1754	1	0.363636	0.5	0.142857	0	0.222222	0.5	0.666667	0.333333	0.444444
0.18363	0.17015	0.666667	0.363636	0.5	0.142857	0	0.222222	0.5	0.5	0.333333	0.444444
0.217695	0.161739	0.666667	0.272727	0.333333	0	0	0.222222	0.5	0.5	0.333333	0.444444
0.269209	0.178713	1	0.181818	0.333333	0	0.2	0.222222	0.5	0.833333	0.333333	0.444444
0.24775	0.170048	0.666667	0.363636	0.5	0	0	0.222222	0.5	0.5	0	0.333333
0.26894	0.175757	1	0.363636	0.5	0	0	0.222222	0.5	0.666667	0.333333	0.222222
0.149913	0.139464	1	0.181818	0.333333	0.142857	0	0.222222	0.5	0.5	0.166667	0.333333
0.194976	0.15654	0.666667	0.363636	0.333333	0.142857	0.1	0.222222	0.5	0.666667	0	0.444444
0.216059	0.175706	1	0.272727	0.666667	0.285714	0	0.222222	0.5	0.5	0	0.222222
0.11562	0.180854	1	0.363636	0.333333	0.142857	0	0.222222	0.5	0.5	0.166667	0.333333
0.250151	0.171118	1	0.363636	0.5	0.142857	0	0.222222	0.5	0.5	0.333333	0.444444
0.220096	0.300489	1	0.454545	0.5	0.285714	0	0.222222	0.5	0.5	0	0.333333
0.181068	0.178306	0.666667	0.272727	0.666667	0.428571	0.1	0.222222	0.5	0	0.333333	0.555556
0.248957	0.180345	0.666667	0.363636	0.666667	0.285714	0	0.222222	0.5	0.666667	0.333333	0.222222
0.312394	0.216689	0.666667	0.363636	0.666667	0.285714	0	0.222222	0.666667	0.5	0.333333	0.333333
0.410499	0.047202	0.333333	0.181818	0.333333	0	0	0	0.333333	0.5	0	0
0.268256	0.181109	0.666667	0.363636	0.666667	0.285714	0	0.222222	0.666667	0.666667	0.333333	0.444444
0.239006	0.234428	0.666667	0.272727	0.666667	0.285714	0	0.222222	0.666667	0.833333	0.333333	0.333333
0.236847	0.196044	0.666667	0.363636	0.5	0.142857	0	0.222222	0.666667	0.5	0	0.222222
0.303381	0.142981	0.666667	0.272727	0.5	0.142857	0	0	0.5	0.5	0	0
0.259686	0.140279	0.666667	0.363636	0.5	0.142857	0	0.222222	0.666667	0.666667	0.333333	0.444444
0.29457	0.153176	0.666667	0.363636	0.5	0.142857	0	0.222222	0.5	0.666667	0.333333	0.111111
0.273621	0.20313	0.666667	0.363636	0.5	0.142857	0.1	0.333333	0.5	0.5	0.5	0.555556
0.190108	0.137323	1	0.363636	0.5	0.285714	0.2	0.222222	0.5	0	0.166667	0.555556
0.152033	0.266949	0.666667	0.454545	0.666667	0.285714	0.1	0.333333	0.5	0.666667	0.833333	0.666667
0.221826	0.112907	1	0.181818	0.5	0.285714	0	0.222222	0.333333	0	0.333333	0.333333
0.248287	0.326843	1	0.454545	0.5	0.285714	0.3	0.444444	0.5	1	0.666667	0.666667
0.201373	0.218269	1	0.363636	0.666667	0.428571	0	0.333333	0.5	0.666667	0.5	0.222222
0.151013	0.209603	0.666667	0.363636	0.5	0.142857	0.5	0.666667	0.5	0.5	0.833333	0.666667
0.300524	0.137935	1	0.363636	0.5	0.142857	0.1	0.222222	0.5	0	0	0.555556
0.345842	0.298603	0.666667	0.545455	0.666667	0.285714	0	0.222222	0.666667	0.833333	0	0.222222
0.21347	0.508564	0.666667	0.363636	0.666667	0.428571	0.5	0.444444	0.5	0.5	0.833333	0.666667
0.226895	0.22459	1	0.545455	0.666667	0.428571	0	0.222222	0.5	0	0.166667	0.444444
0.195258	0.559792	1	0.636364	0.666667	0.428571	0.4	0.333333	0.666667	0.666667	0.833333	0.777778
0.190215	0.384494	0.333333	0.545455	0.833333	0.428571	0.3	0.222222	0.5	0.333333	1	0.555556
0.146064	0.402844	0.666667	0.272727	0.5	0.428571	0.4	0.333333	0.333333	0	1	0.666667
0.199992	0.248394	1	0.545455	0.666667	0.428571	0	0.222222	0.5	0.166667	0.5	0.444444
0.104583	0.289683	0.333333	0.545455	0.666667	0.285714	0	0.222222	0.5	0.5	0.5	0.333333
0.161407	0.294118	0.666667	0.454545	0.666667	0.428571	0.2	0.333333	0.5	0.166667	1	0.555556
0.172646	0.232745	1	0.363636	0.666667	0.428571	0	0.222222	0.5	0.333333	0.5	0.444444
0.164331	0.275971	0.666667	0.363636	0.833333	0.428571	0.2	0.444444	0.5	0.166667	1	0.666667
0.135617	0.52513	1	0.363636	0.833333	0.428571	0.5	0.333333	0.333333	0.333333	0.833333	0.666667
0.151603	0.21205	1	0.181818	0.666667	0.428571	0	0.222222	0.166667	0	0.5	0.444444
0.23163	0.47538	1	0.363636	0.666667	0.428571	0.2	0.444444	0.166667	0	0.833333	0.666667
0.22019	0.227444	1	0.181818	0.666667	0.428571	0.2	0.444444	0.166667	0	1	0.666667
0.170594	0.204608	1	0.181818	0.333333	0.285714	0	0.222222	0.5	0.333333	0.5	0.444444
0.187479	0.271129	1	0.363636	0.5	0.428571	0.2	0.444444	0.333333	0.333333	0.833333	0.666667
0.154017	0.339076	1	0.545455	0.5	0.285714	0.2	0.555556	0.5	0.5	1	0.777778
0.186352	0.34662	1	0.272727	0.5	0.285714	0.2	0.333333	0.5	0.5	1	0.777778
0.159181	0.382608	1	0.363636	0.5	0.714286	0.2	0.222222	0.333333	0.5	1	0.666667
0.224039	0.349934	1	0.454545	0.5	0.428571	0.3	0.222222	0.5	0.833333	0.833333	0.666667
0.309993	0.302528	1	0.545455	0.666667	0.428571	0.3	0.333333	0.333333	0.5	0.666667	0.666667
0.188834	0.304057	0.666667	0.272727	0.5	0.428571	0.3	0.222222	0.333333	0.5	1	0.555556
0.187828	0.487308	1	0.454545	0.5	0.285714	0.6	0.333333	0.5	0.666667	1	0.666667
0.136717	0.336375	1	0.272727	0.666667	0.428571	0.2	0.444444	0.666667	0.666667	1	0.555556
0.066601	0.305383	0.666667	0.272727	0.5	0.428571	0.2	0.333333	0.5	0.5	0.666667	0.777778
0.111879	0.214242	0.666667	0.363636	0.5	0.428571	0	0.222222	0.5	0.333333	0.333333	0.111111
0.08004	0.236059	0.666667	0.272727	0.666667	0.428571	0.1	0.222222	0.5	0.333333	0.5	0.444444
0.159704	0.300948	1	0.363636	0.833333	0.428571	0.2	0.333333	0.5	0.5	0.5	0.666667
0.194896	0.286421	1	0.272727	0.833333	0.571429	0.3	0.222222	0.333333	0.5	0.5	0.666667
0.206081	0.441075	0.666667	0.363636	0.5	0.428571	0.7	0.333333	0.5	0	0.833333	0.666667
0.203103	0.263177	1	0.272727	0.5	0.428571	0	0.222222	0.5	0.5	0.666667	0.444444
0.161756	0.430217	1	0.272727	0.833333	0.571429	0.4	0.222222	0.333333	0.833333	0.666667	0.666667
0.202299	0.413804	1	0.636364	0.666667	0.428571	0.2	0.444444	0.5	0.666667	0.833333	0.666667
0.23049	0.403252	1	0.545455	0.833333	0.428571	0.3	0.444444	0.5	0.333333	1	0.666667
0.207985	0.321796	1	0.454545	0.666667	0.428571	0.2	0.222222	0.5	0	0.666667	0.666667
0.194721	0.296055	0.666667	0.272727	0.5	0.428571	0.2	0.333333	0.5	0.166667	0.666667	0.666667
0.14939	0.251555	1	0.272727	0.5	0.428571	0.1	0.444444	0.5	0	1	0.666667
0.278395	0.502753	0.666667	0.272727	0.5	0.428571	0.7	0.222222	0.5	0.5	1	0.666667
0.215563	0.619839	1	0.545455	0.5	0.428571	0.6	0.444444	0.5	0.5	0.666667	0.666667
0.317155	0.331838	1	0.363636	0.666667	0.428571	0.2	0.222222	0.5	0.333333	0.5	0.666667
0.286644	0.497553	0.666667	0.545455	0.5	0.428571	0.5	0.222222	0.5	0	1	0.777778
0.34092	0.364053	0.666667	0.181818	0.666667	0.428571	0.3	0.444444	0.5	0.833333	1	0.666667
0.245832	0.253645	1	0.454545	0.666667	0.428571	0.2	0.333333	0.5	0	0.666667	0.666667
0.194748	0.336375	1	0.272727	0.5	0.428571	0.3	0.333333	0.5	0.833333	1	0.666667
0.144737	0.287287	1	0.272727	0.666667	0.428571	0.2	0.333333	0.5	0.5	0.666667	0.666667
0.201628	0.317158	0.666667	0.272727	0.5	0.428571	0.3	0.444444	0.5	0	1	0.666667
0.193031	0.444388	1	0.454545	0.666667	0.428571	0.2	0.444444	0.5	0.5	1	0.666667
0.145072	0.348812	1	0.272727	0.666667	0.428571	0.3	0.333333	0.5	0	1	0.666667
0.112107	0.265114	0.666667	0.272727	0.5	0.428571	0.2	0.444444	0.333333	0.5	0.666667	0.666667
0.182021	0.282037	0.666667	0.272727	0.5	0.428571	0.3	0.333333	0.5	0	0.666667	0.666667
0.165565	0.282139	1	0.272727	0.5	0.428571	0.4	0.333333	0.5	0	1	0.666667
0.102665	0.315476	1	0.272727	0.5	0.428571	0.3	0.444444	0.5	0.833333	1	0.666667
0.254872	0.47905	1	0.272727	0.5	0.428571	0.4	0.333333	0.5	0.5	0.833333	0.666667
0.257634	0.277347	1	0.272727	0.666667	0.428571	0.1	0.333333	0.5	0.5	0.666667	0.555556
0.167228	0.311041	1	0.272727	0.5	0.428571	0.3	0.333333	0.5	0.666667	0.666667	0.666667
0.171989	0.311398	1	0.272727	0.5	0.428571	0.2	0.333333	0.333333	1	1	0.666667
0.204619	0.27225	1	0.363636	0.666667	0.428571	0.2	0.333333	0.666667	0.5	0.666667	0.777778
0.250915	0.26649	1	0.363636	0.666667	0.428571	0.2	0.333333	0.5	0.5	0.666667	0.666667
0.188753	0.322765	1	0.272727	0.5	0.428571	0.3	0.222222	0.333333	0.666667	1	0.777778
0.177313	0.293251	0.666667	0.181818	0.5	0.428571	0.2	0.222222	0.5	0.5	0.666667	0.888889
0.176549	0.420022	1	0.363636	0.5	0.428571	0.6	0.333333	0.5	0	1	0.666667
0.226091	0.583444	1	0.272727	0.5	0.428571	0.6	0.333333	0.5	0.333333	1	0.666667
0.242319	0.370782	1	0.272727	0.5	0.428571	0.3	0.444444	0.5	0.5	1	0.888889
0.244397	0.443266	1	0.272727	0.5	0.428571	0.6	0.333333	0.5	0.666667	1	0.666667
0.25455	0.313131	1	0.090909	0.333333	0.571429	0.3	0.444444	0.5	0.5	1	0.666667
0.281949	0.278978	1	0.272727	0.5	0.428571	0.2	0.333333	0.5	0.5	1	0.666667
0.260706	0.598124	1	0.363636	0.5	0.428571	0.2	0.333333	0.5	0.5	1	0.666667
0.246127	0.316291	0.666667	0.272727	0.666667	0.428571	0.2	0.333333	0.5	0.5	1	0.666667
0.219479	0.427821	1	0.454545	0.833333	0.428571	0.2	0.222222	0.5	0.5	0.333333	0.666667
0.173947	0.311296	1	0.181818	0.5	0.285714	0.2	0.333333	0.5	0.5	1	0.666667
0.265883	0.384239	0.666667	0.454545	0.5	0.428571	0.2	0.333333	0.5	0.5	1	0.666667
0.195834	0.279284	1	0.454545	0.5	0.428571	0.2	0.444444	0.333333	0	0.666667	0.555556
0.174778	0.352788	1	0.454545	0.5	0.428571	0.2	0.444444	0.5	0	0.666667	0.666667
0.235707	0.390458	1	0.454545	0.5	0.428571	0.2	0.222222	0.5	0	0.666667	0.444444
0.200475	0.263381	1	0.545455	0.5	0.428571	0.1	0.222222	0.5	0.166667	0.5	0.555556
0.210963	0.237231	1	0.363636	0.5	0.285714	0.1	0.222222	0.5	0	0.5	0.666667
0.270456	0.328729	1	0.454545	0.5	0.428571	0.1	0.222222	0.5	0	0.666667	0.666667
0.319877	0.293506	1	0.454545	0.666667	0.428571	0.1	0.222222	0.5	0.166667	0.5	0.666667
0.348484	0.258283	1	0.363636	0.5	0.428571	0.1	0.444444	0.333333	0	0.5	0.444444
0.320628	0.246712	1	0.363636	0.5	0.428571	0	0.222222	0.333333	0.166667	0.166667	0.333333
0.367112	0.298043	0.666667	0.272727	0.5	0.428571	0	0.222222	0.333333	0.5	0.333333	0.333333
0.435994	0.277449	1	0.363636	0.5	0.428571	0	0.222222	0.5	0.5	0.333333	0.333333
0.361064	0.261189	1	0.363636	0.5	0.428571	0	0.222222	0.5	0.166667	0.333333	0.444444
0.316283	0.307728	1	0.454545	0.5	0.428571	0	0.222222	0.5	0.5	0.333333	0.333333
0.345225	0.346162	1	0.454545	0.5	0.428571	0	0.222222	0.5	0.333333	0.333333	0.333333
0.312045	0.302834	1	0.454545	0.5	0.428571	0	0.333333	0.5	0.5	0.5	0.333333
0.229068	0.374809	1	0.363636	0.5	0.428571	0	0.222222	0.5	0.5	0.5	0.333333
0.185937	0.197523	1	0.272727	0.5	0.428571	0	0.222222	0.166667	0	0.333333	0.444444
0.287623	0.216281	0.666667	0.363636	0.666667	0.428571	0	0.222222	0.333333	0.166667	0.333333	0.333333
0.336212	0.19635	1	0.272727	0.5	0.428571	0	0.222222	0.5	0.166667	0.166667	0.444444
0.236324	0.340351	1	0.272727	0.5	0.428571	0	0.333333	0.5	0.5	0.5	0.444444
0.365449	0.397798	1	0.454545	0.5	0.428571	0	0.222222	0.333333	0.5	0.333333	0.333333
0.361815	0.20522	1	0.272727	0.5	0.428571	0	0.222222	0.5	0.666667	0.333333	0.222222
0.361909	0.28117	1	0.363636	0.5	0.428571	0	0.222222	0.5	0.5	0.333333	0.333333
0.354613	0.307269	0.666667	0.363636	0.5	0.428571	0	0.222222	0.5	0.5	0.5	0.222222
0.33062	0.212611	0.666667	0.363636	0.333333	0.285714	0.2	0.222222	0.5	0.333333	0.5	0.555556
0.312729	0.245489	1	0.363636	0.5	0.428571	0.1	0.222222	0.333333	0	0.5	0.444444
0.431259	0.223009	1	0.363636	0.5	0.428571	0	0.222222	0.333333	0	0.333333	0.222222
0.349557	0.180039	1	0.272727	0.333333	0.285714	0	0.333333	0.5	0.5	0.333333	0.333333
0.334227	0.200632	1	0.272727	0.5	0.571429	0.1	0.222222	0.5	0	0.333333	0.666667
0.321701	0.227495	1	0.181818	0.5	0.428571	0.2	0.444444	0.333333	0	0.833333	0.666667
0.27511	0.258283	1	0.363636	0.5	0.428571	0	0.222222	0.166667	0	0.166667	0.444444
0.392769	0.271129	1	0.545455	0.5	0.428571	0.2	0.222222	0.333333	0	0.333333	0.555556
0.34615	0.287644	1	0.363636	0.5	0.571429	0	0.222222	0.5	0	0.333333	0.444444
0.416359	0.129626	1	0.181818	0.5	0.285714	0	0.222222	0.5	0	0.166667	0.333333
0.441103	0.173565	1	0.181818	0.5	0.428571	0.1	0.222222	0.5	0	0.5	0.555556
0.475544	0.163472	1	0.090909	0.5	0.428571	0	0.222222	0.666667	0	0.333333	0.333333
0.423011	0.158324	1	0.090909	0.5	0.428571	0	0.222222	0.333333	0	0.166667	0.444444
0.377144	0.115149	1	0.272727	0.333333	0.285714	0	0.222222	0.5	0	0.333333	0.333333
0.265292	0.219492	1	0.363636	0.5	0.428571	0.2	0.222222	0.333333	0	0.333333	0.444444
0.326958	0.214854	0.666667	0.363636	0.5	0.428571	0	0.222222	0.5	0.166667	0.333333	0.222222
0.333383	0.143491	1	0.181818	0.666667	0.428571	0	0.222222	0.333333	0	0.166667	0.333333
0.295897	0.471098	0.666667	0.545455	0.5	0.428571	0	0.222222	0.333333	0	0.333333	0.444444
0.309349	0.287491	1	0.454545	0.666667	0.428571	0.2	0.222222	0.333333	0	0.5	0.444444
0.282191	0.339535	1	0.545455	0.5	0.428571	0	0.222222	0.333333	0	0.166667	0.444444
0.274439	0.312621	1	0.363636	0.5	0.428571	0	0.222222	0.5	0.5	0.333333	0.444444
0.258761	0.302987	1	0.454545	0.666667	0.428571	0.2	0.222222	0.5	0.5	0.333333	0.555556
0.334227	0.258487	1	0.363636	0.666667	0.428571	0	0.333333	0.5	0	0.5	0.333333
0.309872	0.23769	1	0.272727	0.5	0.428571	0	0.222222	0.5	0	0.333333	0.333333
0.34615	0.190692	1	0.181818	0.5	0.285714	0	0.222222	0.5	0.166667	0.5	0.333333
0.393318	0.158528	1	0.272727	0.666667	0.428571	0	0.222222	0.166667	0	0.333333	0.444444
0.3353	0.196758	1	0.363636	0.5	0.285714	0.2	0.222222	0.333333	0	0.333333	0.444444
0.353942	0.244673	0.666667	0.363636	0.5	0.571429	0.4	0.333333	0.333333	0	0.166667	0.444444
0.329024	0.298807	0.666667	0.363636	0.5	0.428571	0.2	0.222222	0.5	0.666667	0.166667	0.444444
0.295549	0.208839	0.666667	0.272727	0.5	0.285714	0.2	0.222222	0.5	0.666667	0	0.444444
0.309805	0.126415	0.333333	0	0	0.285714	0.2	0.333333	0.333333	0	0.5	0.777778
0.253531	0.308543	1	0.363636	0.666667	0.428571	0.2	0.222222	0.5	0.5	0.166667	0.444444
0.206282	0.515853	1	0.363636	0.5	0.428571	0.2	0.222222	0.333333	0	0.333333	0.555556
0.271837	0.286319	1	0.454545	0.666667	0.571429	0	0.222222	0.333333	0	0.166667	0.222222
0.326194	0.194362	0.666667	0.272727	0.5	0.571429	0.1	0.222222	0.333333	0	0.333333	0.666667
0.355458	0.17224	1	0.272727	0.5	0.571429	0	0.222222	0.5	0	0.333333	0.444444
0.299116	0.167091	0.666667	0.272727	0.333333	0.428571	0.1	0.444444	0.5	0	0.5	0.555556
0.341818	0.226883	1	0.272727	0.333333	0.285714	0.2	0.222222	0.5	0.666667	0.333333	0.444444
0.361547	0.129677	0.666667	0.272727	0.333333	0.285714	0.2	0.222222	0.333333	0	0	0.444444
0.35303	0.120145	1	0.272727	0.333333	0.285714	0	0.222222	0.5	0	0.333333	0.444444
0.33239	0.128199	1	0.272727	0.333333	0.142857	0	0.222222	0.333333	0	0.333333	0.444444
0.299425	0.251045	0.666667	0.272727	0.5	0.428571	0.2	0.222222	0.5	0.166667	0.333333	0.555556
0.285021	0.201601	1	0.272727	0.5	0.428571	0	0.222222	0.5	0	0.333333	0.444444
0.325711	0.116526	1	0.272727	0.333333	0.285714	0	0.222222	0.5	0	0.333333	0.333333
0.271462	0.149149	1	0.272727	0.333333	0.142857	0.2	0.222222	0.5	0.5	0	0.444444
0.269048	0.127689	1	0.272727	0.333333	0.285714	0	0.222222	0.5	0	0.333333	0.444444
0.316551	0.134723	0.666667	0.272727	0.333333	0.285714	0.2	0.222222	0.333333	0	0.333333	0.444444
0.233601	0.155928	1	0.272727	0.5	0.428571	0.1	0.222222	0.5	0	0.166667	0.444444
0.208173	0.152207	1	0.272727	0.5	0.428571	0	0.222222	0.5	0	0.333333	0.444444
0.164331	0.097869	1	0.181818	0.333333	0.285714	0	0.222222	0.333333	0	0	0.333333
0.257809	0.118718	1	0.272727	0.333333	0.285714	0.1	0.222222	0.5	0	0.166667	0.333333
0.241836	0.118055	1	0.272727	0.333333	0.285714	0.1	0.222222	0.333333	0	0.166667	0.555556
0.178239	0.165919	1	0.454545	0.333333	0.285714	0.2	0.222222	0.5	0	0.333333	0.555556
0.22361	0.168009	1	0.272727	0.5	0.428571	0	0.222222	0.5	0	0	0.222222
0.300484	0.18376	1	0.181818	0.5	0.428571	0.1	0.444444	0.5	0	0.333333	0.444444
0.230946	0.20369	0.666667	0.181818	0.333333	0.285714	0.2	0.444444	0.333333	0	0.666667	0.666667
0.157692	0.133551	0.666667	0.272727	0.333333	0.285714	0	0.222222	0.666667	0.166667	0	0.222222
0.204525	0.14451	1	0.272727	0.5	0.285714	0	0.222222	0.5	0	0.5	0.333333
0.296152	0.13977	1	0.272727	0.333333	0.285714	0.1	0.333333	0.5	0	0.166667	0.666667
0.186969	0.151341	1	0.272727	0.5	0.285714	0	0.222222	0.333333	0	0.5	0.444444
0.214557	0.140585	1	0.272727	0.333333	0.285714	0.1	0.333333	0.5	0	0.5	0.444444
0.218741	0.136966	1	0.181818	0.333333	0.285714	0	0.333333	0.5	0	0.333333	0.444444
0.241608	0.127383	1	0.272727	0.333333	0.285714	0	0.222222	0.333333	0	0.166667	0.444444
0.218232	0.181823	0.666667	0.181818	0.333333	0.285714	0.2	0.444444	0.5	0	0.5	0.666667
0.333436	0.206596	1	0.272727	0.333333	0.285714	0.2	0.444444	0.5	0	0.666667	0.666667
0.219854	0.143797	1	0.272727	0.5	0.285714	0	0.222222	0.333333	0	0.5	0.444444
0.27515	0.138342	1	0.272727	0.333333	0.285714	0	0.222222	0.5	0	0.166667	0.333333
0.255529	0.181976	1	0.272727	0.333333	0.285714	0.1	0.444444	0.5	0	0.833333	0.666667
0.170701	0.134672	0.666667	0.272727	0.333333	0.285714	0	0.222222	0.5	0	0.333333	0.333333
0.220297	0.188959	1	0.272727	0.5	0.285714	0	0.222222	0.5	0.166667	0.166667	0.111111
0.268162	0.262412	1	0.272727	0.333333	0.428571	0.1	0.666667	0.666667	0.666667	0.833333	0.666667
0.263147	0.151341	1	0.363636	0.5	0.285714	0	0.222222	0.5	0	0.166667	0.333333
0.289299	0.144153	1	0.272727	0.333333	0.285714	0	0.333333	0.5	0	0.5	0.222222
0.274372	0.124885	1	0.363636	0.333333	0.285714	0	0.222222	0.5	0	0	0.222222
0.361185	0.139209	0.666667	0.272727	0.333333	0.285714	0.2	0.444444	0.5	0	0	0.555556
0.282312	0.132939	1	0.363636	0.333333	0.285714	0	0.222222	0.333333	0	0	0.333333
0.33986	0.238913	1	0.636364	0.5	0.285714	0	0.333333	0.666667	0	0.166667	0.222222
0.241313	0.140228	1	0.181818	0.5	0.285714	0	0.333333	0.5	0	0.166667	0.444444
0.256401	0.14609	1	0.363636	0.5	0.285714	0	0.222222	0.666667	0	0.333333	0.333333
0.342529	0.171118	1	0.454545	0.5	0.428571	0	0.222222	0.5	0	0	0.333333
0.312259	0.146855	0.666667	0.363636	0.5	0.285714	0	0.222222	0.5	0	0.333333	0.333333
0.270764	0.215873	1	0.545455	0.5	0.428571	0.1	0.333333	0.5	0	0	0.444444
0.309912	0.176929	1	0.363636	0.5	0.142857	0	0.333333	0.666667	0	0.333333	0.444444
0.236847	0.179274	1	0.454545	0.5	0.428571	0	0.222222	0.5	0	0.166667	0.222222
0.244558	0.18901	1	0.363636	0.5	0.428571	0	0.333333	0.5	0	0.333333	0.333333
0.325899	0.197064	1	0.363636	0.333333	0.285714	0.1	0.444444	0.5	0.166667	0.833333	0.666667
0.361627	0.195382	1	0.272727	0.5	0.428571	0.1	0.333333	0.5	0	0.166667	0.666667
0.346901	0.30472	0.666667	0.545455	0.5	0.428571	0.1	0.222222	0.5	0	0.5	0.444444
0.254657	0.143746	1	0.272727	0.5	0.428571	0.1	0.222222	0.5	0	0.5	0.444444
0.35814	0.208023	1	0.272727	0.5	0.428571	0.2	0.222222	0.5	0	0.5	0.666667
0.385593	0.182027	1	0.454545	0.5	0.285714	0.1	0.444444	0.333333	0	0.833333	0.666667
0.343481	0.199154	1	0.272727	0.333333	0.285714	0.2	0.444444	0.333333	0	0.833333	0.666667
0.300363	0.161688	1	0.272727	0.333333	0.285714	0.2	0.222222	0.5	0.166667	0.333333	0.444444
0.305809	0.126822	1	0.181818	0.5	0.285714	0	0.222222	0.333333	0	0.333333	0.444444
0.269718	0.218779	1	0.454545	0.5	0.285714	0.1	0.444444	0.5	0	0.666667	0.666667
0.288011	0.152513	1	0.272727	0.5	0.285714	0.2	0.222222	0.5	0	0.5	0.444444
0.400266	0.220512	1	0.363636	0.5	0.428571	0.1	0.444444	0.5	0	0.833333	0.666667
0.365436	0.13299	1	0.181818	0.5	0.285714	0	0.222222	0.5	0	0	0.333333
0.374972	0.183199	1	0.272727	0.333333	0.142857	0.1	0.222222	0.5	0.166667	0.333333	0.555556
0.345882	0.131971	1	0.272727	0.333333	0.142857	0	0.222222	0.5	0	0.333333	0.444444
0.227901	0.223978	1	0.363636	0.5	0.428571	0.1	0.444444	0.5	0	0.5	0.666667
0.194238	0.104292	1	0.181818	0.333333	0.142857	0	0.222222	0.5	0	0.166667	0.333333
0.242104	0.169436	0.666667	0.272727	0.5	0.428571	0	0.222222	0.5	0	0.166667	0.222222
0.246436	0.268427	1	0.272727	0.666667	0.428571	0.2	0.444444	0.5	0	1	0.666667
0.239328	0.238607	1	0.272727	0.5	0.428571	0.1	0.333333	0.5	0	0.833333	0.666667
0.322881	0.17851	1	0.181818	0.333333	0.142857	0.2	0.444444	0.5	0	0.833333	0.666667
0.261886	0.164084	0.666667	0.272727	0.5	0.285714	0.1	0.444444	0.333333	0	0.833333	0.555556
0.275592	0.208023	0.666667	0.272727	0.5	0.428571	0	0.444444	0.333333	0	0.5	0.444444
0.306023	0.130951	1	0.272727	0.333333	0.142857	0	0.222222	0.5	0	0.166667	0.333333
0.291311	0.119992	0.666667	0.272727	0.5	0.285714	0	0.222222	0.166667	0	0.166667	0.444444
0.343642	0.134978	0.666667	0.272727	0.5	0.285714	0	0.222222	0.5	0	0.5	0.444444
0.319113	0.143898	1	0.272727	0.5	0.285714	0.1	0.555556	0.5	0	0.333333	0.555556
0.360433	0.116424	1	0.181818	0.5	0.285714	0	0.333333	0.333333	0	0.333333	0.444444
0.298016	0.143695	1	0.272727	0.333333	0.285714	0.1	0.333333	0.5	0	0.333333	0.444444
0.27173	0.157712	0.666667	0.272727	0.333333	0.285714	0	0.222222	0.5	0.333333	0.166667	0.444444
0.317758	0.135947	1	0.272727	0.5	0.285714	0	0.222222	0.5	0	0.5	0.444444
0.383743	0.196197	1	0.272727	0.5	0.428571	0.1	0.333333	0.5	0	0.333333	0.555556
0.36962	0.187736	1	0.272727	0.333333	0.285714	0.2	0.444444	0.333333	0	0.833333	0.666667
0.407186	0.154042	1	0.272727	0.333333	0.285714	0.2	0.222222	0.5	0	0.333333	0.444444
0.31525	0.189265	1	0.272727	0.333333	0.285714	0.1	0.444444	0.5	0	0.666667	0.555556
0.314808	0.225252	1	0.272727	0.5	0.285714	0.2	0.444444	0.5	0	0.833333	0.777778
0.361708	0.133092	1	0.272727	0.5	0.285714	0	0.222222	0.333333	0	0.333333	0.333333
0.357778	0.13248	1	0.272727	0.333333	0.285714	0	0.222222	0.5	0	0.166667	0.333333
0.303086	0.119278	1	0.272727	0.5	0.285714	0	0.222222	0.333333	0	0.333333	0.333333
0.335005	0.199307	1	0.272727	0.5	0.428571	0.2	0.444444	0.166667	0	0.833333	0.666667
0.411652	0.169334	1	0.272727	0.333333	0.285714	0.2	0.444444	0.5	0	0.666667	0.666667
0.2792	0.103629	0.666667	0.181818	0.333333	0.142857	0	0.222222	0.5	0	0.166667	0.444444
0.288923	0.151035	0.666667	0.272727	0.5	0.142857	0.2	0.222222	0.5	0	0.333333	0.666667
0.265413	0.477164	1	0.727273	0.5	0.428571	0	0.222222	0.5	0	0.166667	0.444444
0.26666	0.198185	0.666667	0.181818	0.5	0.428571	0	0.333333	0.333333	0.166667	0.5	0.444444
0.332377	0.216893	1	0.363636	0.5	0.428571	0	0.222222	0.5	0	0.5	0.444444
0.442015	0.102457	0.666667	0.272727	0.5	0.285714	0	0.222222	0.5	0	0.333333	0.222222
0.327455	0.166633	1	0.272727	0.5	0.428571	0	0.222222	0.5	0	0.333333	0.333333
0.258976	0.189826	1	0.272727	0.5	0.285714	0	0.222222	0.5	0.166667	0.166667	0.444444
0.218661	0.193649	1	0.363636	0.5	0.428571	0	0.222222	0.5	0	0.166667	0.444444
0.215268	0.267204	0.666667	0.545455	0.5	0.428571	0	0.222222	0.166667	0	0.5	0.333333
0.314298	0.103069	1	0.181818	0.5	0.142857	0	0.222222	0.166667	0	0.166667	0.333333
0.22542	0.139566	1	0.272727	0.5	0.285714	0	0.222222	0.333333	0	0.333333	0.333333
0.177125	0.218065	1	0.454545	0.5	0.428571	0	0.222222	0.333333	0	0.166667	0.333333
0.147164	0.266133	0.666667	0.545455	0.5	0.428571	0	0.222222	0.5	0	0.166667	0.333333
0.20085	0.280763	0.666667	0.454545	0.5	0.285714	0	0.333333	0.5	0	0.166667	0.444444
0.24602	0.493628	1	0.545455	0.5	0.428571	0	0.222222	0.5	0	0.166667	0.333333
0.117337	0.271638	1	0.454545	0.5	0.285714	0.1	0.222222	0.5	0	0.333333	0.555556
0.217574	0.506779	0.666667	0.636364	0.5	0.428571	0	0.222222	0.5	0	0.166667	0.444444
0.233091	0.257926	0.666667	0.545455	0.5	0.428571	0	0.333333	0.5	0	0.5	0.444444
0.176643	0.214803	1	0.272727	0.5	0.428571	0.2	0.222222	0.5	0	0.333333	0.555556
0.161675	0.169487	0.666667	0.090909	0.5	0.428571	0	0.222222	0.166667	0	0.333333	0.444444
0.159436	0.358701	0.666667	0.454545	0.5	0.285714	0.2	0.333333	0.5	0	0.166667	0.666667
0.17958	0.230095	0.666667	0.454545	0.5	0.428571	0	0.222222	0.5	0	0.166667	0.222222
0.151429	0.31048	0.666667	0.545455	0.5	0.428571	0	0.222222	0.5	0	0.333333	0.444444
0.19216	0.451524	1	0.545455	0.5	0.428571	0	0.222222	0.5	0	0.333333	0.444444
0.207315	0.325161	1	0.545455	0.5	0.571429	0	0.444444	0.333333	0	0	0.222222
0.238443	0.261444	1	0.545455	0.5	0.428571	0	0.333333	0.5	0	0.5	0.444444
0.215053	0.223468	0.666667	0.272727	0.5	0.285714	0	0.222222	0.333333	0	0.166667	0.333333
0.196049	0.234122	0.666667	0.363636	0.5	0.428571	0	0.222222	0.5	0	0.166667	0.333333
0.176723	0.225966	1	0.363636	0.5	0.428571	0	0.222222	0.5	0	0.333333	0.333333
0.227418	0.130238	1	0.272727	0.5	0.285714	0	0.333333	0.333333	0	0.166667	0.444444
0.221893	0.220257	0.666667	0.454545	0.5	0.428571	0.2	0.222222	0.5	0	0	0.444444
0.274976	0.15654	0.666667	0.363636	0.5	0.285714	0	0.222222	0.333333	0	0	0.444444
0.337714	0.246457	1	0.454545	0.5	0.428571	0	0.222222	0.333333	0	0.333333	0.333333
0.365503	0.113263	0.666667	0.272727	0.333333	0.285714	0	0.222222	0.5	0	0.333333	0.333333
0.334013	0.105515	0.666667	0.272727	0.333333	0.285714	0	0.222222	0.333333	0	0.166667	0.333333
0.291914	0.140126	1	0.272727	0.5	0.285714	0.1	0.222222	0.333333	0	0.166667	0.444444
0.33184	0.241207	0.666667	0.363636	0.5	0.428571	0	0.222222	0.333333	0	0	0.222222
0.297695	0.119176	1	0.272727	0.333333	0.285714	0	0.222222	0.5	0	0.166667	0.333333
0.245417	0.109134	0.666667	0.181818	0.333333	0.285714	0.2	0.333333	0.333333	0	0.166667	0.444444
0.192857	0.133041	1	0.272727	0.5	0.285714	0	0.222222	0.5	0	0.333333	0.444444
0.219425	0.166786	1	0.454545	0.5	0.285714	0	0.222222	0.333333	0	0.166667	0.444444
0.314378	0.137884	1	0.363636	0.5	0.285714	0	0.222222	0.5	0	0.333333	0.444444
0.303743	0.10995	1	0.181818	0.333333	0.142857	0.2	0.222222	0.333333	0	0.333333	0.444444
0.300001	0.253543	0.666667	0.454545	0.5	0.428571	0.2	0.222222	0.333333	0	0.333333	0.555556
0.305782	0.117443	0.666667	0.272727	0.5	0.285714	0	0.222222	0.5	0	0.333333	0.444444
0.203036	0.45025	1	0.454545	0.5	0.428571	0.2	0.555556	0.5	0.666667	0.833333	0.666667
0.301973	0.166786	1	0.181818	0.333333	0.142857	0.2	0.444444	0.5	0.5	0	0.555556
0.138366	0.229228	0.666667	0.363636	0.5	0.285714	0.1	0.444444	0.5	0.5	0.833333	0.666667
0.171399	0.181415	1	0.363636	0.5	0.285714	0	0.222222	0.5	0.333333	0.333333	0.444444
0.200609	0.112907	1	0.181818	0.5	0.285714	0	0.222222	0.333333	0	0.333333	0.444444
0.218084	0.199918	1	0.545455	0.5	0.428571	0	0.333333	0.166667	0	0.333333	0.222222
0.255381	0.263788	1	0.454545	0.5	0.428571	0	0.333333	0.5	0.666667	0.5	0.333333
0.256776	0.239066	0.666667	0.272727	0.5	0.428571	0	0.222222	0.5	0.333333	0.333333	0.444444
0.196652	0.227954	0.666667	0.545455	0.5	0.428571	0	0.333333	0.5	0	0.166667	0.333333
0.253075	0.346671	0.666667	0.545455	0.5	0.428571	0	0.222222	0.5	0	0.333333	0.333333
0.312192	0.278775	0.666667	0.454545	0.5	0.285714	0.1	0.444444	0.5	0	0.666667	0.555556
0.297896	0.334234	1	0.454545	0.5	0.428571	0	0.222222	0.333333	0	0.333333	0.333333
0.388289	0.309716	1	0.363636	0.5	0.285714	0	0.222222	0.333333	0	0.166667	0.444444
0.382428	0.219543	0.666667	0.363636	0.5	0.428571	0	0.222222	0.333333	0	0.333333	0.444444
0.320829	0.186156	0.666667	0.363636	0.5	0.285714	0	0.222222	0.333333	0	0.166667	0.333333
0.233319	0.59843	1	0.818182	0.5	0.285714	0.2	0.555556	0.666667	0.166667	1	0.666667
0.295173	0.431135	0.666667	0.363636	0.5	0.428571	0.1	0.555556	0.5	0	0.833333	0.666667
0.284444	0.285503	0.666667	0.545455	0.5	0.142857	0.2	0.444444	0.333333	0	0.166667	0.555556
0.369996	0.368488	0.666667	0.727273	0.5	0.428571	0	0.222222	0.5	0	0.333333	0.333333
0.252753	0.352686	1	0.545455	0.5	0.428571	0	0.222222	0.5	0	0.5	0.444444
0.369406	0.354165	1	0.636364	0.5	0.428571	0	0.222222	0.333333	0	0.333333	0.444444
0.45084	0.295086	1	0.454545	0.5	0.428571	0	0.333333	0.5	0	0.333333	0.444444
0.313788	0.252727	0.666667	0.454545	0.333333	0.285714	0	0.222222	0.5	0	0.333333	0.444444
0.260156	0.371699	1	0.545455	0.5	0.142857	0.2	0.444444	0.5	0	0.833333	0.666667
0.245725	0.285962	1	0.545455	0.333333	0.285714	0	0.333333	0.5	0	0.333333	0.333333
0.291311	0.315781	1	0.545455	0.5	0.285714	0	0.222222	0.5	0	0.333333	0.444444
0.249762	0.435926	0.666667	0.545455	0.5	0.428571	0	0.222222	0.5	0	0.333333	0.333333
0.322492	0.515394	1	0.454545	0.5	0.428571	0	0.222222	0.333333	0	0.166667	0.444444
0.29406	0.477164	1	0.545455	0.5	0.428571	0	0.222222	0.5	0	0.5	0.444444
0.336601	0.501172	1	0.545455	0.5	0.428571	0.2	0.222222	0.5	0	0.333333	0.666667
0.359977	0.464115	1	0.454545	0.5	0.428571	0	0.222222	0.333333	0	0	0.444444
0.298674	0.522785	1	0.545455	0.5	0.428571	0.1	0.444444	0.5	0	0.5	0.666667
0.296058	0.367469	1	0.545455	0.5	0.142857	0	0.222222	0.5	0	0	0.222222
0.251049	0.292181	1	0.454545	0.5	0.285714	0	0.222222	0.333333	0	0.166667	0.333333
0.312608	0.35289	1	0.636364	0.5	0.428571	0	0.222222	0.5	0	0.333333	0.111111
0.237437	0.304057	0.666667	0.545455	0.5	0.142857	0	0.222222	0.5	0	0.333333	0.444444
0.318013	0.465389	0.666667	0.545455	0.666667	0.285714	0	0.222222	0.5	0	0.333333	0.333333
0.354988	0.375064	1	0.454545	0.5	0.285714	0	0.222222	0.5	0	0.333333	0.333333
0.324303	0.373382	1	0.363636	0.5	0.285714	0.1	0.444444	0.333333	0	0.833333	0.666667
0.336454	0.360383	1	0.363636	0.5	0.285714	0.1	0.444444	0.333333	0	0.833333	0.666667
0.359951	0.63559	0.666667	0.454545	0.666667	0.428571	0.2	0.555556	0.5	0	0.833333	0.666667
0.441264	0.519676	0.666667	0.454545	0.5	0.428571	0	0.333333	0.166667	0	0.5	0.333333
0.388691	0.425833	1	0.545455	0.5	0.428571	0	0.444444	0.5	0	0.5	0.333333
0.349208	0.570242	1	0.909091	0.5	0.285714	0.2	0.555556	0.5	0	0.666667	0.666667
0.36329	0.554746	0.666667	0.545455	0.5	0.285714	0	0.222222	0.5	0	0.5	0.333333
0.272092	0.541136	1	0.545455	0.5	0.285714	0	0.333333	0.666667	0	0.166667	0.333333
0.330258	0.459374	0.666667	0.545455	0.5	0.285714	0	0.444444	0.5	0	0.333333	0.444444
0.257608	0.548476	1	0.363636	0.5	0.428571	0.2	0.555556	0.5	0	0.833333	0.666667
0.287676	0.504842	0.666667	0.818182	0.5	0.285714	0.1	0.444444	0.333333	0	1	0.666667
0.302979	0.308339	1	0.363636	0.333333	0.285714	0.2	0.333333	0.333333	0	0.333333	0.444444
0.257071	0.468753	0.666667	0.545455	0.5	0.285714	0.1	0.444444	0.5	0	0.833333	0.666667
0.292142	0.452442	1	0.636364	0.5	0.285714	0	0.222222	0.333333	0.166667	0.5	0.333333
0.313842	0.463554	0.666667	0.454545	0.5	0.285714	0	0.333333	0.333333	0	0.5	0.222222
0.174175	0.510653	1	0.545455	0.5	0.285714	0	0.444444	0.666667	0	0.5	0.222222
0.192079	0.509685	1	0.545455	0.5	0.285714	0.1	0.444444	0.5	0	0.833333	0.666667
0.338224	0.52197	1	0.363636	0.5	0.285714	0.2	0.333333	0.5	0.5	0.166667	0.555556
0.270577	0.336426	1	0.363636	0.333333	0.285714	0	0.222222	0.5	0.5	0.333333	0.333333
0.283143	0.542104	1	0.545455	0.5	0.285714	0.2	0.444444	0.5	0	0.833333	0.555556
0.213605	0.584514	1	0.545455	0.5	0.428571	0.2	0.555556	0.666667	0	0.5	0.666667
0.218781	0.520033	1	0.363636	0.5	0.285714	0.2	0.444444	0.333333	0	0.666667	0.666667
0.218875	0.504842	1	0.636364	0.5	0.285714	0.1	0.444444	0.5	0	0.333333	0.666667
0.233051	0.311245	0.666667	0.454545	0.5	0.285714	0	0.333333	0.333333	0	0.333333	0.333333
0.324719	0.557498	1	0.545455	0.5	0.428571	0	0.222222	0.5	0.166667	0.166667	0.444444
0.265292	0.195688	1	0.272727	0.5	0.285714	0.2	0.444444	0.333333	0	0.666667	0.666667
0.361654	0.525487	1	0.545455	0.5	0.428571	0	0.222222	0.333333	0	0.5	0.444444
0.234808	0.519013	1	0.636364	0.5	0.428571	0.1	0.222222	0.5	0.166667	0.166667	0.444444
0.254979	0.565399	0.666667	0.545455	0.5	0.428571	0.1	0.222222	0.5	0.5	0	0.555556
0.182624	0.525589	1	0.545455	0.5	0.428571	0.1	0.222222	0.166667	0	0.333333	0.555556
0.193434	0.452646	0.666667	0.545455	0.5	0.428571	0.2	0.444444	0.5	0	0.333333	0.444444
0.172753	0.536701	1	0.636364	0.5	0.428571	0.1	0.333333	0.5	0	0.166667	0.555556
0.272629	0.49057	0.666667	0.454545	0.5	0.428571	0	0.222222	0.5	0	0.333333	0.444444
0.180948	0.473851	0.666667	0.545455	0.5	0.428571	0	0.222222	0.5	0	0.166667	0.444444
0.25278	0.480936	1	0.454545	0.5	0.428571	0.1	0.222222	0.5	0	0.166667	0.444444
0.230999	0.485931	1	0.545455	0.5	0.428571	0.1	0.444444	0.333333	0	0.666667	0.666667
0.156968	0.468957	1	0.454545	0.5	0.428571	0	0.222222	0.5	0.333333	0.5	0.444444
0.251546	0.49266	1	0.545455	0.5	0.571429	0	0.333333	0.666667	0.5	0.333333	0.444444
0.162923	0.438475	0.666667	0.454545	0.5	0.428571	0	0.222222	0.333333	0	0.333333	0.444444
0.213363	0.424508	0.666667	0.636364	0.5	0.428571	0.2	0.222222	0.5	0	0.5	0.444444
0.197296	0.433123	0.666667	0.454545	0.5	0.428571	0	0.222222	0.333333	0	0.333333	0.222222
0.180371	0.451728	1	0.454545	0.5	0.428571	0	0.222222	0.5	0	0.333333	0.444444
0.139157	0.437608	1	0.363636	0.5	0.428571	0	0.222222	0.333333	0	0.333333	0.444444
0.295187	0.435365	1	0.545455	0.5	0.428571	0	0.222222	0.5	0	0	0.222222
0.288521	0.481548	1	0.454545	0.5	0.428571	0.2	0.222222	0.5	0	0.333333	0.444444
0.224052	0.326384	1	0.454545	0.5	0.142857	0.1	0.222222	0.5	0	0.333333	0.555556
0.199764	0.120502	1	0.181818	0.333333	0.142857	0	0.222222	0.5	0.166667	0	0.444444
0.174376	0.471608	1	0.818182	0.5	0.428571	0.1	0.222222	0.5	0	0.333333	0.444444
0.174456	0.415486	0.666667	0.545455	0.5	0.428571	0	0.222222	0.5	0	0.333333	0.333333
0.24779	0.510857	0.666667	0.545455	0.5	0.428571	0	0.222222	0.5	0.166667	0.5	0.333333
0.280582	0.487766	1	0.545455	0.5	0.428571	0	0.222222	0.5	0	0.333333	0.444444
0.319649	0.462229	1	0.636364	0.5	0.428571	0	0.222222	0.5	0	0	0.444444
0.26367	0.483434	1	0.545455	0.5	0.428571	0.4	0.444444	0.5	0	0.333333	0.444444
0.216542	0.441278	1	0.363636	0.5	0.428571	0	0.222222	0.333333	0	0.333333	0.111111
0.201642	0.466408	0.666667	0.363636	0.5	0.428571	0.2	0.333333	0.5	0	0.333333	0.555556
0.281172	0.493934	0.666667	0.545455	0.5	0.428571	0	0.222222	0.5	0	0.333333	0.444444
0.279428	0.480681	0.666667	0.363636	0.5	0.428571	0.1	0.333333	0.333333	0	0	0.444444
0.21964	0.422724	0.666667	0.545455	0.5	0.428571	0	0.222222	0.5	0	0.333333	0.444444
0.175677	0.453155	1	0.545455	0.5	0.428571	0	0.222222	0.333333	0	0.333333	0.444444
0.183751	0.445509	0.666667	0.454545	0.5	0.285714	0	0.222222	0.5	0	0.333333	0.444444
0.204632	0.451779	0.666667	0.454545	0.5	0.428571	0	0.222222	0.333333	0	0.333333	0.222222
0.245819	0.307065	1	0.181818	0.5	0.285714	0	0.222222	0.5	0	0.333333	0.444444
0.179553	0.10368	0.666667	0.272727	0.333333	0.142857	0	0.222222	0.5	0	0.166667	0.333333
0.193487	0.476756	0.666667	0.545455	0.5	0.428571	0	0.222222	0.5	0	0.333333	0.333333
0.182865	0.285503	1	0.454545	0.333333	0.285714	0	0.222222	0.5	0	0	0.333333
0.26308	0.481802	1	0.545455	0.5	0.428571	0	0.222222	0.5	0	0.333333	0.222222
0.249319	0.49164	1	0.545455	0.5	0.428571	0	0.222222	0.5	0	0.5	0.444444
0.208374	0.283107	1	0.363636	0.5	0.285714	0	0.222222	0.333333	0	0.333333	0.333333
0.200542	0.497757	0.666667	0.636364	0.5	0.428571	0	0.222222	0.333333	0	0.166667	0.222222
0.241581	0.514324	0.666667	0.545455	0.5	0.428571	0.1	0.222222	0.333333	0.166667	0.5	0.444444
0.251921	0.382761	0.666667	0.454545	0.5	0.428571	0	0.222222	0.5	0	0.166667	0.333333
0.218151	0.336834	1	0.545455	0.5	0.285714	0.1	0.222222	0.5	0	0.333333	0.333333
0.193943	0.384545	0.666667	0.454545	0.5	0.428571	0	0.222222	0.5	0	0.333333	0.444444
0.206429	0.275308	0.666667	0.454545	0.333333	0.285714	0.2	0.222222	0.333333	0	0.333333	0.444444
0.121039	0.46962	1	0.545455	0.5	0.428571	0	0.222222	0.333333	0	0.333333	0.444444
0.152958	0.486441	0.666667	0.545455	0.5	0.428571	0.2	0.222222	0.5	0	0.166667	0.555556
0.107466	0.490825	1	0.545455	0.5	0.428571	0.1	0.333333	0.5	0.5	0.333333	0.444444
0.07772	0.478897	0.666667	0.454545	0.5	0.428571	0	0.222222	0.5	0	0.333333	0.333333
0.127986	0.12932	0.666667	0.272727	0.333333	0.285714	0	0.333333	0.5	0	0.333333	0.333333
0.098521	0.112957	0.666667	0.272727	0.5	0.285714	0	0.222222	0.5	0	0	0.444444
0.119697	0.601794	1	0.545455	0.5	0.428571	0.1	0.222222	0.333333	0.5	0.333333	0.444444
0.102853	0.620756	1	0.454545	0.5	0.428571	0	0.222222	0.5	0	0.166667	0.444444
0.164344	0.547456	1	0.454545	0.5	0.428571	0	0.222222	0.333333	0	0.333333	0.333333
0.147875	0.464828	1	0.545455	0.5	0.428571	0.1	0.222222	0.333333	0	0.333333	0.444444
0.144442	0.477215	1	0.363636	0.5	0.428571	0	0.222222	0.333333	0	0.166667	0.222222
0.077961	0.476297	1	0.363636	0.5	0.428571	0	0.222222	0.333333	0	0.333333	0.222222
0.123976	0.57381	1	0.545455	0.5	0.428571	0.2	0.222222	0.5	0	0.333333	0.444444
0.114762	0.504995	0.666667	0.363636	0.5	0.428571	0.1	0.222222	0.5	0	0.333333	0.333333
0.115339	0.373535	1	0.545455	0.5	0.428571	0	0.222222	0.5	0	0.333333	0.333333
0.093921	0.47905	0.666667	0.545455	0.5	0.428571	0.1	0.222222	0.333333	0.166667	0.333333	0.444444
0.065609	0.482975	1	0.545455	0.5	0.428571	0	0.222222	0.5	0	0.333333	0.444444
0.138809	0.41778	1	0.545455	0.5	0.428571	0	0.222222	0.5	0	0.333333	0.333333
0.143691	0.546233	1	0.545455	0.5	0.428571	0.2	0.222222	0.5	0.666667	0.5	0.444444
0.132157	0.381945	1	0.636364	0.5	0.428571	0	0.333333	0.5	0	0.5	0.222222
0.093424	0.486594	1	0.545455	0.5	0.428571	0	0.333333	0.5	0	0.5	0.444444
0.103215	0.496177	1	0.454545	0.5	0.428571	0.3	0.555556	0.333333	0	1	0.666667
0.054531	0.317973	1	0.363636	0.5	0.285714	0.1	0.222222	0.5	0.166667	0.5	0.666667
0.125089	0.275461	0.666667	0.454545	0.333333	0.285714	0.2	0.222222	0.5	0	0.333333	0.333333
0.099983	0.486492	1	0.545455	0.5	0.428571	0	0.222222	0.333333	0	0.333333	0.333333
0.163231	0.308696	1	0.454545	0.5	0.285714	0	0.333333	0.333333	0	0.333333	0.333333
0.130091	0.422928	1	0.545455	0.5	0.428571	0	0.222222	0.5	0	0.333333	0.222222
0.153333	0.322765	1	0.545455	0.5	0.428571	0	0.222222	0.5	0	0	0.111111
0.156297	0.250841	1	0.454545	0.5	0.285714	0	0.222222	0.5	0	0.166667	0.222222
0.104516	0.440922	1	0.545455	0.5	0.428571	0	0.222222	0.5	0	0.333333	0.333333
0.157008	0.142624	1	0.454545	0.5	0.428571	0	0.222222	0.5	0	0	0.333333
0.205075	0.374044	1	0.363636	0.5	0.428571	0	0.222222	0.333333	0	0.166667	0.333333
0.147821	0.423183	1	0.454545	0.5	0.428571	0	0.222222	0.333333	0	0	0.333333
0.135094	0.459374	1	0.545455	0.5	0.428571	0	0.222222	0.333333	0	0.166667	0.333333
0.096227	0.459221	0.666667	0.454545	0.666667	0.571429	0.1	0.222222	0.5	0	0.333333	0.444444
0.160643	0.110613	0.666667	0.272727	0.333333	0.285714	0	0.222222	0.5	0	0	0.333333
0.088905	0.282496	1	0.363636	0.5	0.285714	0.2	0.222222	0.666667	0	0.333333	0.444444
0.12879	0.508716	1	0.545455	0.5	0.428571	0	0.222222	0.5	0	0.166667	0.222222
0.097971	0.465236	1	0.545455	0.5	0.428571	0	0.222222	0.5	0	0	0.222222
0.109894	0.501019	1	0.545455	0.5	0.428571	0	0.222222	0.5	0	0.333333	0.444444
0.071658	0.416403	0.666667	0.454545	0.666667	0.428571	0	0.222222	0.5	0	0.333333	0.444444
0.11098	0.519421	1	0.454545	0.5	0.428571	0	0.222222	0.5	0.5	0.166667	0.444444
0.141974	0.482261	0.666667	0.545455	0.5	0.428571	0.1	0.333333	0.5	0	0.166667	0.444444
0.141464	0.441584	0.666667	0.545455	0.5	0.428571	0	0.222222	0.5	0	0	0.444444
0.101283	0.540371	1	0.545455	0.5	0.428571	0	0.222222	0.5	0.833333	0.333333	0.444444
0.091305	0.449536	1	0.454545	0.5	0.428571	0	0.222222	0.5	0.166667	0.333333	0.444444
0.040234	0.393771	1	0.454545	0.5	0.428571	0	0.222222	0.5	0	0.166667	0.444444
0.109947	0.34662	0.666667	0.363636	0.5	0.428571	0.1	0.222222	0.333333	0	0.333333	0.444444
0.15281	0.494801	1	0.454545	0.5	0.428571	0	0.333333	0.5	0	0.333333	0.444444
0.192106	0.458864	1	0.363636	0.5	0.285714	0.2	0.444444	0.666667	0.666667	0	0.444444
0.192616	0.303803	1	0.363636	0.333333	0.285714	0	0.222222	0.5	0.333333	0.666667	0.333333
0.191878	0.30681	1	0.272727	0.333333	0.285714	0	0.222222	0.5	0.666667	0.333333	0.333333
0.231858	0.31466	0.666667	0.363636	0.5	0.428571	0	0.222222	0.5	0.333333	0.333333	0.333333
0.13044	0.348405	1	0.272727	0.5	0.428571	0.1	0.222222	0.333333	0	0.333333	0.444444
0.127664	0.318381	1	0.363636	0.5	0.285714	0	0.222222	0.5	0	0.5	0.444444
0.190242	0.280966	1	0.363636	0.5	0.285714	0	0.222222	0.333333	0	0.166667	0.444444
0.140861	0.366959	1	0.363636	0.5	0.285714	0	0.222222	0.5	0.166667	0.166667	0.444444
0.209045	0.333979	1	0.363636	0.5	0.285714	0	0.333333	0.333333	0	0.5	0.444444
0.190349	0.317667	1	0.454545	0.5	0.285714	0	0.222222	0.5	0	0.5	0.444444
0.166034	0.310888	1	0.363636	0.5	0.285714	0.1	0.333333	0.5	0	0.333333	0.555556
0.194091	0.290702	1	0.363636	0.5	0.285714	0.1	0.333333	0.5	0	0.333333	0.333333
0.161635	0.153838	1	0.090909	0.5	0.285714	0.2	0.333333	0.333333	0	0.666667	0.666667
0.182222	0.221939	1	0.272727	0.333333	0.285714	0.1	0.333333	0.5	0.166667	0.666667	0.666667
0.112053	0.385615	1	0.363636	0.5	0.428571	0.1	0.333333	0.333333	0	0.5	0.555556
0.107587	0.152462	1	0.181818	0.333333	0.285714	0.1	0.333333	0.333333	0	0.666667	0.666667
0.175623	0.188245	1	0.272727	0.333333	0.285714	0.3	0.333333	0.333333	0	0.833333	0.666667
0.179043	0.129881	0.666667	0.181818	0.333333	0.285714	0	0.555556	0.333333	0	0.333333	0.333333
0.082507	0.277449	0.666667	0.272727	0.5	0.428571	0	0.222222	0.333333	0	0.5	0.444444
0.092298	0.314813	0.666667	0.454545	0.5	0.285714	0.2	0.333333	0.333333	0	0.166667	0.555556
0.203251	0.1754	0.666667	0.181818	0.5	0.285714	0.2	0.333333	0.5	0	0.666667	0.666667
0.231375	0.221531	1	0.272727	0.5	0.428571	0.3	0.222222	0.5	0	0.5	0.666667
0.201789	0.165358	1	0.181818	0.5	0.428571	0.2	0.222222	0.333333	0	0.333333	0.444444
0.188257	0.402895	1	0.545455	0.5	0.428571	0.1	0.222222	0.5	0	0	0.444444
0.140606	0.117086	1	0.272727	0.5	0.285714	0.2	0.222222	0.5	0	0	0.444444
0.195955	0.475023	0.666667	0.545455	0.5	0.428571	0	0.222222	0.5	0	0	0.222222
0.154594	0.456672	1	0.545455	0.5	0.428571	0	0.222222	0.5	0	0	0.222222
0.196317	0.11204	0.666667	0.363636	0.333333	0.285714	0	0.222222	0.5	0	0	0.222222
0.185266	0.489499	1	0.545455	0.5	0.428571	0	0.222222	0.5	0	0.333333	0.444444
0.133484	0.199664	1	0.272727	0.333333	0.285714	0.1	0.333333	0.5	0.333333	0.333333	0.555556
0.218741	0.126109	1	0.272727	0.333333	0.285714	0.1	0.222222	0.5	0	0.166667	0.555556
0.185293	0.48532	1	0.545455	0.5	0.428571	0.2	0.444444	0.5	0	0.333333	0.666667
0.154648	0.145581	1	0.181818	0.333333	0.285714	0	0.222222	0.5	0.166667	0	0.333333
0.075373	0.526404	1	0.545455	0.5	0.428571	0	0.222222	0.5	0	0.5	0.444444
0.156539	0.404119	1	0.363636	0.5	0.428571	0	0.222222	0.5	0.833333	0.166667	0.222222
0.105213	0.47171	1	0.545455	0.5	0.428571	0.3	0.333333	0.5	0.5	0.333333	0.555556
0.133431	0.123968	1	0.272727	0.333333	0.285714	0	0.222222	0.5	0	0.333333	0.222222
0.255971	0.550668	1	0.545455	0.5	0.428571	0.2	0.444444	0.5	0	0	0.555556
0.240991	0.578092	1	0.363636	0.5	0.428571	0.2	0.333333	0.5	0	0.166667	0.666667
0.212076	0.434652	1	0.454545	0.5	0.428571	0.2	0.333333	0.333333	0	0	0.555556
0.15619	0.137425	1	0.272727	0.333333	0.142857	0.2	0.333333	0.333333	0	0.166667	0.666667
0.174229	0.144612	1	0.272727	0.333333	0.285714	0.2	0.444444	0.5	0	0.166667	0.666667
0.22133	0.159955	0.666667	0.272727	0.666667	0.428571	0.2	0.333333	0.333333	0	0.333333	0.444444
0.237531	0.561219	1	0.454545	0.5	0.428571	0	0.222222	0.333333	0	0	0.333333
0.338465	0.129218	0.666667	0.181818	0.333333	0.142857	0.2	0.444444	0.666667	0	0.333333	0.555556
0.229081	0.131257	1	0.272727	0.333333	0.285714	0.3	0.666667	0.5	0	0.5	0.666667
0.177327	0.131512	1	0.272727	0.5	0.285714	0.1	0.222222	0.5	0	0.333333	0.555556
0.298741	0.139464	0.666667	0.181818	0.5	0.285714	0.2	0.333333	0.666667	0	0.666667	0.444444
0.129568	0.151188	1	0.272727	0.5	0.285714	0.1	0.222222	0.5	0.166667	0.666667	0.444444
0.237812	0.159853	0.666667	0.272727	0.333333	0.285714	0.4	0.333333	0.5	0.333333	0.666667	0.888889
0.17046	0.443368	1	0.545455	0.5	0.428571	0.2	0.333333	0.333333	0.333333	0.666667	0.444444
0.18029	0.266184	0.666667	0.363636	0.5	0.285714	0.4	0.333333	0.5	0.333333	0.5	0.666667
0.170688	0.43088	0.666667	0.454545	0.5	0.428571	0.3	0.444444	0.5	0.333333	0.166667	0.666667
0.150758	0.297533	1	0.454545	0.5	0.285714	0.2	0.333333	0.333333	0	0.5	0.444444
0.194909	0.500306	1	0.454545	0.5	0.428571	0.2	0.222222	0.5	0	0.333333	0.555556
0.227097	0.499184	1	0.545455	0.5	0.428571	0.1	0.222222	0.5	0	0.5	0.555556
0.315344	0.303803	1	0.363636	0.5	0.142857	0.2	0.444444	0.333333	0	0.5	0.666667
0.301758	0.480477	1	0.454545	0.5	0.285714	0	0.222222	0.5	0	0.166667	0.333333
0.323069	0.260271	0.666667	0.363636	0.5	0.428571	0	0.222222	0.5	0	0	0.333333
0.368252	0.450709	0.666667	0.363636	0.5	0.428571	0	0.222222	0.5	0	0.333333	0.222222
0.29469	0.490366	1	0.545455	0.5	0.428571	0	0.222222	0.5	0	0.166667	0.444444
0.269584	0.307524	1	0.545455	0.5	0.285714	0	0.222222	0.5	0	0.333333	0.333333
0.243928	0.299164	0.666667	0.454545	0.5	0.285714	0	0.222222	0.5	0	0.166667	0.333333
0.308236	0.548935	1	0.545455	0.5	0.428571	0.2	0.444444	0.5	0.166667	0.5	0.666667
0.378002	0.295086	1	0.454545	0.5	0.285714	0.2	0.555556	0.666667	0	0.166667	0.555556
0.354439	0.313335	1	0.454545	0.5	0.142857	0.1	0.444444	0.5	0	0.333333	0.555556
0.305969	0.343664	0.666667	0.545455	0.5	0.428571	0	0.222222	0.333333	0	0.166667	0.222222
0.318952	0.369304	0.666667	0.454545	0.5	0.428571	0	0.333333	0.5	0.166667	0.166667	0.444444
0.1727	0.424355	1	0.454545	0.5	0.428571	0.2	0.555556	0.333333	0	0.333333	0.666667
0.263616	0.522581	1	0.454545	0.5	0.428571	0.1	0.444444	0.333333	0.666667	0.333333	0.555556
0.355029	0.511775	1	0.454545	0.5	0.428571	0.2	0.333333	0.5	0	0.166667	0.555556
0.271663	0.487919	1	0.454545	0.5	0.571429	0	0.333333	0.333333	0	0	0.333333
0.203975	0.504995	0.666667	0.545455	0.5	0.428571	0.2	0.555556	0.5	0	0.5	0.666667
0.212974	0.45234	1	0.545455	0.5	0.428571	0	0.222222	0.5	0	0.333333	0.333333
0.310355	0.315578	1	0.454545	0.5	0.285714	0	0.222222	0.5	0.333333	0.166667	0.222222
0.299639	0.288663	0.666667	0.363636	0.5	0.142857	0.2	0.333333	0.333333	0	0.5	0.666667
0.300229	0.407381	0.666667	0.545455	0.5	0.428571	0	0.222222	0.5	0	0.166667	0.222222
0.418706	0.369559	0.666667	0.727273	0.5	0.428571	0.1	0.333333	0.5	0	0.166667	0.666667
0.368722	0.373076	0.666667	0.454545	0.5	0.428571	0.1	0.444444	0.5	0	0.166667	0.555556
0.394043	0.108421	0.666667	0.181818	0.333333	0.285714	0	0.222222	0.333333	0	0.166667	0.222222
0.308169	0.342543	1	0.454545	0.5	0.428571	0	0.222222	0.5	0	0.166667	0.333333
0.221169	0.256703	0.666667	0.454545	0.5	0.142857	0.1	0.333333	0.5	0	0.333333	0.555556
0.201575	0.401876	1	0.636364	0.5	0.428571	0	0.222222	0.5	0	0.166667	0.111111
0.240495	0.294118	0.666667	0.363636	0.5	0.428571	0	0.222222	0.333333	0	0.166667	0.222222
0.217105	0.32042	0.666667	0.636364	0.5	0.428571	0	0.222222	0.5	0	0	0.333333
0.21457	0.347436	1	0.363636	0.5	0.428571	0	0.222222	0.333333	0	0	0.222222
0.247817	0.335151	1	0.454545	0.5	0.428571	0	0.222222	0.5	0	0.333333	0.333333
0.183737	0.339229	1	0.363636	0.5	0.428571	0	0.222222	0.333333	0	0.166667	0.222222
0.23792	0.411306	1	0.363636	0.5	0.428571	0	0.333333	0.5	0	0.333333	0.333333
0.255784	0.353451	0.666667	0.636364	0.5	0.428571	0	0.222222	0.5	0	0.333333	0.333333
0.267854	0.31359	0.666667	0.454545	0.5	0.428571	0	0.222222	0.5	0	0.333333	0.333333
0.27063	0.345601	0.666667	0.545455	0.5	0.428571	0	0.222222	0.333333	0	0	0.444444
0.361359	0.429809	1	0.454545	0.5	0.428571	0.2	0.444444	0.5	0	0	0.666667
0.19853	0.407585	0.666667	0.363636	0.5	0.428571	0	0.333333	0.5	0	0.166667	0.444444
0.258667	0.470639	0.666667	0.545455	0.5	0.428571	0.2	0.444444	0.5	0	0.666667	0.666667
0.213605	0.538077	0.666667	0.454545	0.5	0.285714	0.2	0.555556	0.5	0	0.333333	0.666667
0.151711	0.49842	1	0.454545	0.5	0.285714	0.1	0.444444	0.5	1	0.333333	0.555556
0.184488	0.503262	1	0.545455	0.5	0.428571	0.1	0.222222	0.333333	0.166667	0.333333	0.444444
0.274506	0.520593	0.666667	0.454545	0.5	0.285714	0.2	0.333333	0.333333	0	0.333333	0.666667
0.150597	0.438628	1	0.545455	0.5	0.428571	0	0.222222	0.5	0	0.333333	0.222222
0.210077	0.501019	1	0.545455	0.5	0.428571	0	0.333333	0.333333	0	0.333333	0.444444
0.25392	0.306504	0.666667	0.727273	0.5	0.142857	0	0.333333	0.5	0.166667	0.333333	0.333333
0.227378	0.105362	1	0.181818	0.333333	0.285714	0	0.222222	0.333333	0	0	0.222222
0.254228	0.512183	0.666667	0.636364	0.5	0.428571	0.1	0.444444	0.333333	0	0.166667	0.666667
0.210949	0.426598	1	0.545455	0.5	0.428571	0	0.333333	0.5	0	0.333333	0.444444
0.293899	0.467071	1	0.363636	0.5	0.428571	0	0.333333	0.5	0	0.166667	0.333333
0.362807	0.456621	1	0.545455	0.5	0.428571	0	0.222222	0.5	0	0.166667	0.444444
0.351448	0.461107	0.666667	0.909091	0.5	0.428571	0.3	0.555556	0.5	0	0.166667	0.666667
0.322962	0.407177	0.666667	0.545455	0.5	0.428571	0	0.333333	0.5	0	0.166667	0.333333
0.239489	0.326282	0.666667	0.454545	0.5	0.285714	0.1	0.333333	0.5	0.5	0.5	0.666667
0.235599	0.367876	0.666667	0.454545	0.5	0.428571	0	0.222222	0.5	0.5	0	0.333333
0.16299	0.39056	1	0.454545	0.5	0.428571	0.2	0.555556	0.166667	0	0.333333	0.666667
0.181095	0.375828	1	0.363636	0.5	0.428571	0.2	0.555556	0.333333	0	0.666667	0.666667
0.156686	0.506219	0.666667	0.363636	0.5	0.428571	0.1	0.555556	0.5	0.5	0.5	0.555556
0.248783	0.472729	0.666667	0.454545	0.5	0.428571	0	0.222222	0.5	0.5	0.166667	0.333333
0.243928	0.524569	1	0.454545	0.666667	0.571429	0.4	0.555556	0.666667	0	0.666667	0.666667
0.240964	0.532572	1	0.545455	0.5	0.428571	0	0.222222	0.5	0.5	0	0.333333
0.23517	0.471608	1	0.454545	0.5	0.428571	0.2	0.333333	0.5	0.5	0.166667	0.666667
0.139882	0.423947	0.666667	0.454545	0.5	0.428571	0	0.222222	0.333333	0	0.166667	0.333333
0.235894	0.381741	1	0.545455	0.5	0.428571	0.1	0.333333	0.5	0	0.333333	0.666667
0.246986	0.357886	0.666667	0.545455	0.5	0.428571	0.1	0.444444	0.333333	0	0.333333	0.666667
0.245524	0.444745	1	0.454545	0.5	0.428571	0.1	0.333333	0.5	0	0.333333	0.666667
0.250593	0.27694	1	0.545455	0.5	0.142857	0	0.222222	0.5	0.166667	0.166667	0.444444
0.222094	0.330105	1	0.454545	0.5	0.285714	0	0.222222	0.5	0	0.333333	0.444444
0.190738	0.424151	0.666667	0.545455	0.5	0.428571	0.7	0.555556	0.666667	0.333333	0.166667	0.666667
0.209031	0.317362	1	0.545455	0.333333	0.142857	0.4	0.555556	0.666667	0.333333	0.333333	0.777778
0.094296	0.477674	1	0.454545	0.5	0.428571	0.2	0.444444	0.5	0	0.5	0.666667
0.191462	0.494138	0.666667	0.545455	0.5	0.428571	0.2	0.444444	0.333333	0	0.333333	0.555556
0.204163	0.251453	0.666667	0.454545	0.333333	0.285714	0	0.222222	0.5	0	0	0.222222
0.180116	0.471812	1	0.545455	0.5	0.428571	0.2	0.444444	0.5	0	0.333333	0.555556
0.300511	0.266082	0.666667	0.545455	0.5	0.142857	0	0.222222	0.5	0	0	0.333333
0.257085	0.439494	0.666667	0.545455	0.5	0.428571	0.1	0.444444	0.666667	0	0.5	0.666667
0.350965	0.472576	0.666667	0.545455	0.5	0.428571	0	0.222222	0.5	0	0	0.333333
0.307244	0.445968	0.666667	0.636364	0.5	0.428571	0	0.222222	0.5	0	0	0.444444
0.353004	0.49582	0.666667	0.545455	0.5	0.428571	0.1	0.444444	0.5	0	0	0.555556
0.378271	0.485676	0.666667	0.636364	0.5	0.428571	0.2	0.333333	0.5	0	0	0.777778
0.294825	0.462687	0.666667	0.545455	0.5	0.428571	0	0.222222	0.5	0	0	0.444444
0.344983	0.445305	0.666667	0.545455	0.5	0.285714	0	0.222222	0.5	0.333333	0	0.222222
0.261859	0.545774	1	0.454545	0.5	0.428571	0.2	0.555556	0.333333	0.333333	0.666667	0.666667
0.239274	0.437455	1	0.363636	0.5	0.428571	0	0.222222	0.333333	0	0.166667	0.444444
0.318764	0.468753	0.666667	0.454545	0.666667	0.428571	0.1	0.333333	0.333333	0	0.333333	0.666667
0.209125	0.504129	1	0.545455	0.5	0.428571	0.1	0.444444	0.5	0	0.666667	0.666667
0.270563	0.488633	1	0.454545	0.5	0.428571	0.2	0.444444	0.5	0	0.5	0.555556
0.172995	0.483434	1	0.545455	0.5	0.428571	0.2	0.444444	0.5	0	0.666667	0.666667
0.273245	0.38796	0.666667	0.545455	0.5	0.428571	0	0.222222	0.5	0	0	0.222222
0.240495	0.467938	1	0.545455	0.5	0.428571	0.1	0.222222	0.5	0	0.333333	0.444444
0.306157	0.5288	0.666667	0.545455	0.833333	0.428571	0.2	0.555556	0.5	0.333333	0.333333	0.666667
0.19397	0.431339	0.666667	0.454545	0.5	0.428571	0	0.222222	0.5	0.166667	0.333333	0.333333
0.237973	0.430319	0.666667	0.545455	0.5	0.428571	0.2	0.444444	0.5	0	0.666667	0.666667
0.276558	0.440157	1	0.545455	0.5	0.428571	0.1	0.333333	0.5	0	0.333333	0.666667
0.35189	0.532011	1	0.636364	0.666667	0.428571	0.1	0.333333	0.5	0.166667	0.333333	0.666667
0.405617	0.389489	0.666667	0.454545	0.5	0.285714	0	0.222222	0.5	0	0	0.222222
0.38102	0.515649	0.666667	0.636364	0.5	0.285714	0.2	0.555556	0.666667	0	0.333333	0.555556
0.439883	0.440616	0.666667	0.636364	0.5	0.428571	0.2	0.444444	0.5	0.333333	0.166667	0.555556
0.393935	0.435569	0.666667	0.545455	0.5	0.428571	0	0.222222	0.5	0	0	0.222222
0.367515	0.471455	1	0.545455	0.5	0.428571	0.2	0.444444	0.5	0	0.666667	0.666667
0.447045	0.399429	0.666667	0.454545	0.5	0.428571	0.2	0.444444	0.5	0	0.666667	0.555556
0.384145	0.413957	0.666667	0.545455	0.5	0.428571	0.2	0.333333	0.5	0	0.666667	0.555556
0.335099	0.437404	1	0.545455	0.5	0.428571	0.2	0.333333	0.5	0	0.666667	0.444444
0.368561	0.44347	1	0.545455	0.5	0.428571	0	0.222222	0.5	0	0.333333	0.444444
0.298727	0.355235	1	0.545455	0.5	0.428571	0	0.222222	0.5	0	0	0.222222
0.298325	0.449383	0.666667	0.454545	0.666667	0.285714	0.1	0.333333	0.5	0.166667	0.5	0.555556
0.345936	0.420226	0.666667	0.545455	0.5	0.142857	0.2	0.222222	0.5	0.166667	0.666667	0.555556
0.392621	0.494342	0.666667	0.545455	0.5	0.428571	0.2	0.333333	0.5	0	0.5	0.666667
0.382844	0.353349	0.666667	0.454545	0.5	0.285714	0.1	0.444444	0.5	0	0.5	0.666667
0.264018	0.403609	1	0.545455	0.5	0.428571	0.2	0.333333	0.5	0	0.5	0.555556
0.317356	0.404475	1	0.636364	0.5	0.428571	0	0.222222	0.5	0.333333	0.166667	0.333333
0.269718	0.434958	0.666667	0.545455	0.5	0.285714	0	0.222222	0.333333	0	0.166667	0.444444
0.313574	0.44923	0.666667	0.545455	0.5	0.428571	0	0.222222	0.5	0	0	0.222222
0.36962	0.526302	1	0.545455	0.5	0.428571	0.1	0.222222	0.5	0.333333	0.5	0.444444
0.283063	0.502345	1	0.636364	0.5	0.428571	0.2	0.444444	0.5	0.333333	0.5	0.666667
0.323793	0.479407	0.666667	0.636364	0.666667	0.428571	0.2	0.333333	0.5	0.333333	0.666667	0.555556
0.336226	0.522785	0.666667	0.545455	0.5	0.428571	0.2	0.444444	0.5	0.333333	0.666667	0.666667
0.391441	0.490264	1	0.636364	0.5	0.428571	0.3	0.555556	0.5	0.166667	0.5	0.666667
0.360715	0.574116	1	1	0.5	0.428571	0.2	0.444444	0.5	0.333333	0.5	0.666667
0.277604	0.54292	1	1	0.5	0.428571	0	0.222222	0.666667	0.333333	0.166667	0.444444
0.322667	0.52044	1	0.545455	0.5	0.428571	0	0.222222	0.5	0	0.166667	0.333333
0.328581	0.516617	0.666667	0.545455	0.5	0.428571	0.2	0.444444	0.5	0	0	0.666667
0.412792	0.508156	0.666667	0.454545	0.5	0.428571	0.1	0.444444	0.5	0	0.166667	0.666667
0.471011	0.497808	0.666667	0.545455	0.5	0.428571	0.1	0.222222	0.5	0	0.166667	0.444444
0.404584	0.5576	1	0.454545	0.5	0.428571	0.1	0.222222	0.5	0.166667	0	0.444444
0.392916	0.479865	1	0.636364	0.5	0.428571	0	0.222222	0.5	0.166667	0	0.333333
0.352923	0.536293	1	0.545455	0.5	0.285714	0	0.222222	0.5	0.333333	0	0.333333
0.307472	0.533592	1	0.545455	0.5	0.285714	0.2	0.333333	0.5	0	0.333333	0.666667
0.342543	0.519421	1	0.454545	0.5	0.428571	0.1	0.333333	0.5	0.333333	0.333333	0.666667
0.397047	0.521103	1	0.545455	0.5	0.428571	0.2	0.333333	0.5	0	0	0.666667
0.380484	0.580946	0.666667	0.545455	0.5	0.428571	0.2	0.333333	0.5	0.333333	0.166667	0.666667
0.324424	0.603935	1	0.545455	0.5	0.428571	0.2	0.333333	0.5	0	0.333333	0.666667
0.317141	0.5131	1	0.545455	0.5	0.428571	0	0.222222	0.5	0	0	0.333333
0.324866	0.529208	0.666667	0.545455	0.5	0.428571	0	0.222222	0.5	0	0.333333	0.333333
0.35244	0.593791	1	0.545455	0.5	0.285714	0.2	0.333333	0.5	0.333333	0.5	0.666667
0.299277	0.260373	1	0.454545	0.5	0.285714	0	0.222222	0.5	0.333333	0.166667	0.444444
0.324866	0.479611	0.666667	0.454545	0.5	0.428571	0	0.222222	0.333333	0	0.166667	0.333333
0.340035	0.497706	0.666667	0.545455	0.5	0.428571	0.2	0.333333	0.5	0.333333	0	0.666667
0.272226	0.499388	0.666667	0.545455	0.5	0.571429	0.1	0.666667	0.666667	0.333333	0.166667	0.444444
0.344916	0.572637	1	0.636364	0.5	0.428571	0.2	0.444444	0.5	0.166667	0.333333	0.666667
0.284927	0.50316	0.666667	0.454545	0.5	0.428571	0.2	0.333333	0.333333	0	0.333333	0.555556
0.313037	0.514324	0.666667	0.545455	0.5	0.428571	0	0.222222	0.5	0.833333	0.166667	0.333333
0.246235	0.61413	1	0.545455	0.5	0.428571	0.2	0.555556	0.5	0.333333	0.666667	0.666667
0.323015	0.612805	1	0.545455	0.5	0.571429	0.1	0.444444	0.5	0.333333	0.666667	0.666667
0.282607	0.360791	1	0.454545	0.5	0.285714	0.1	0.333333	0.5	0.5	0.666667	0.555556
0.265641	0.649353	1	0.454545	0.5	0.571429	0.2	0.555556	0.333333	0.5	0	0.666667
0.246476	0.185697	0.666667	0.272727	0.5	0.285714	0.1	0.333333	0.5	0.166667	0.666667	0.666667
0.328367	0.517229	1	0.454545	0.5	0.571429	0.1	0.333333	0.5	0	0.333333	0.666667
0.284471	0.623254	1	0.454545	0.5	0.571429	0.1	0.333333	0.333333	0.5	0.333333	0.666667
0.290747	0.541238	1	0.545455	0.5	0.428571	0.2	0.444444	0.5	0	0.666667	0.666667
0.402224	0.499235	1	0.545455	0.5	0.428571	0	0.222222	0.5	0	0.166667	0.333333
0.311066	0.512794	1	0.636364	0.5	0.428571	0	0.222222	0.333333	0	0	0.333333
0.370009	0.640534	0.666667	0.454545	0.5	0.285714	0.2	0.444444	0.5	0.5	0.166667	0.666667
0.317772	0.514018	1	0.454545	0.5	0.428571	0	0.222222	0.333333	0	0.166667	0.333333
0.319502	0.543328	1	0.545455	0.5	0.428571	0.2	0.444444	0.5	0	0.666667	0.666667
0.371471	0.555765	0.666667	0.454545	0.5	0.428571	0	0.222222	0.5	0.5	0	0.333333
0.327669	0.527424	0.666667	0.545455	0.5	0.285714	0.2	0.444444	0.5	0	0.666667	0.666667
0.322184	0.293965	0.666667	0.454545	0.5	0.285714	0	0.222222	0.5	0	0.166667	0.333333
0.391508	0.508156	0.666667	0.545455	0.5	0.428571	0.2	0.444444	0.5	0	0.666667	0.666667
0.381905	0.479967	1	0.636364	0.5	0.428571	0.2	0.333333	0.5	0	0.166667	0.666667
0.358542	0.675349	0.666667	0.454545	0.5	0.428571	0.1	0.444444	0.666667	0.666667	0.833333	0.666667
0.329372	0.59374	1	0.545455	0.5	0.428571	0.1	0.444444	0.5	0.166667	0.666667	0.666667
0.335367	0.573759	1	0.454545	0.5	0.428571	0.1	0.444444	0.5	0	0.5	0.666667
0.286335	0.569936	0.666667	0.909091	0.5	0.428571	0.2	0.444444	0.5	0	0.333333	0.555556
0.313466	0.414415	0.666667	0.545455	0.5	0.428571	0.1	0.222222	0.5	0	0.333333	0.444444
0.36903	0.542512	0.666667	0.545455	0.5	0.428571	0.1	0.333333	0.5	0.166667	0.333333	0.666667
0.326583	0.464268	0.666667	0.545455	0.5	0.285714	0.1	0.222222	0.5	0.5	0.666667	0.666667
0.356383	0.579009	1	0.545455	0.5	0.428571	0.2	0.333333	0.5	0.166667	0.166667	0.666667
0.317919	0.484708	1	0.545455	0.5	0.428571	0	0.222222	0.5	0	0	0.222222
0.315022	0.423285	0.666667	0.454545	0.5	0.285714	0.2	0.333333	0.333333	0.5	0.666667	0.666667
0.314499	0.571771	1	0.636364	0.5	0.428571	0.1	0.333333	0.5	0.166667	0.5	0.666667
0.267183	0.5576	0.666667	0.545455	0.5	0.428571	0.2	0.333333	0.5	0	0.5	0.666667
0.430911	0.36232	1	0.454545	0.5	0.428571	0.4	0.444444	0.5	0	0.166667	0.555556
0.369406	0.382914	0.666667	0.454545	0.5	0.285714	0.2	0.444444	0.5	0	0.5	0.666667
0.390636	0.462178	0.666667	0.454545	0.5	0.571429	0.1	0.333333	0.5	0	0.333333	0.555556
0.312219	0.502396	0.666667	0.545455	0.5	0.428571	0.1	0.333333	0.5	0	0.666667	0.666667
0.29689	0.524518	1	0.454545	0.5	0.428571	0.2	0.333333	0.333333	0	0.5	0.666667
0.325376	0.55286	1	0.363636	0.5	0.428571	0.2	0.444444	0.5	0.5	0.5	0.555556
0.273809	0.525997	1	0.545455	0.5	0.428571	0.2	0.333333	0.5	0.5	0.333333	0.444444
0.333959	0.476093	0.666667	0.545455	0.5	0.428571	0	0.333333	0.5	0	0.333333	0.444444
0.376152	0.546743	0.666667	0.363636	0.5	0.428571	0.1	0.222222	0.5	0.5	0.333333	0.555556
0.373416	0.535732	1	0.636364	0.5	0.428571	0.1	0.333333	0.666667	0.5	0.833333	0.666667
0.255529	0.556632	1	0.363636	0.5	0.428571	0.1	0.333333	0.5	0.666667	0.333333	0.444444
0.291968	0.533439	0.666667	0.363636	0.5	0.428571	0.1	0.444444	0.666667	0.333333	0.166667	0.555556
0.282379	0.540728	1	0.363636	0.5	0.428571	0	0.222222	0.5	0.5	0.166667	0.333333
0.252672	0.539046	1	0.454545	0.5	0.428571	0	0.222222	0.5	0.5	0.166667	0.222222
0.344434	0.553165	0.666667	0.363636	0.5	0.428571	0.1	0.555556	0.666667	0.666667	0.5	0.666667
0.348739	0.462127	0.666667	0.545455	0.5	0.428571	0.2	0.222222	0.333333	0	0.333333	0.555556
0.322895	0.305587	1	0.363636	0.5	0.142857	0.1	0.222222	0.333333	0	0.166667	0.666667
0.408889	0.317973	1	0.454545	0.5	0.285714	0	0.333333	0.333333	0	0.5	0.444444
0.405979	0.282954	0.666667	0.545455	0.333333	0.285714	0	0.333333	0.5	0	0.166667	0.222222
0.43142	0.443419	1	0.545455	0.5	0.428571	0	0.222222	0.333333	0	0.166667	0.222222
0.409533	0.298348	1	0.363636	0.5	0.428571	0	0.333333	0.5	0	0.166667	0.333333
0.387619	0.301458	0.666667	0.454545	0.333333	0.285714	0.1	0.333333	0.5	0	0.333333	0.555556
0.305205	0.437557	0.666667	0.545455	0.5	0.428571	0	0.222222	0.333333	0	0.166667	0.333333
0.26666	0.301407	0.666667	0.545455	0.5	0.285714	0	0.222222	0.5	0	0.166667	0.111111
0.320226	0.420124	0.666667	0.454545	0.5	0.428571	0.2	0.222222	0.333333	0	0.333333	0.444444
0.303448	0.268427	0.666667	0.454545	0.333333	0.285714	0	0.222222	0.5	0	0.166667	0.444444
0.326878	0.436028	0.666667	0.454545	0.5	0.428571	0.1	0.222222	0.333333	0	0.5	0.666667
0.37135	0.463656	1	0.545455	0.5	0.285714	0	0.333333	0.666667	0	0	0.222222
0.30499	0.549393	1	0.636364	0.5	0.428571	0.1	0.222222	0.5	0	0.833333	0.666667
0.35924	0.51045	1	0.545455	0.5	0.428571	0.3	0.444444	0.5	0	1	0.666667
0.433834	0.34606	1	0.545455	0.5	0.285714	0	0.777778	0.666667	0	0.5	0.444444
0.434036	0.404526	1	0.636364	0.5	0.428571	0	0.444444	0.5	0	0.333333	0.444444
0.471655	0.268325	1	0.454545	0.5	0.285714	0.2	0.444444	0.5	0	0.333333	0.444444
0.420638	0.248853	0.666667	0.454545	0.333333	0.285714	0.2	0.555556	0.5	0	0.5	0.333333
0.396658	0.26022	0.666667	0.272727	0.5	0.285714	0.2	0.666667	0.333333	0	0.333333	0.444444
0.35185	0.441839	0.666667	0.545455	0.5	0.428571	0.1	0.666667	0.666667	0	0.5	0.333333
0.35004	0.32409	1	0.454545	0.5	0.285714	0.1	0.777778	0.5	0	0.5	0.444444
0.285946	0.341625	0.666667	0.454545	0.333333	0.285714	0.1	0.555556	0.5	0	0.333333	0.444444
0.312072	0.196452	1	0.363636	0.5	0.285714	0.2	0.333333	0.5	0.166667	0.333333	0.444444
0.371605	0.306708	1	0.454545	0.5	0.285714	0.2	0.444444	0.666667	0	0.333333	0.555556
0.312876	0.373382	1	0.363636	0.5	0.428571	0.2	0.444444	0.5	0	0.5	0.555556
0.340437	0.330258	0.666667	0.454545	0.666667	0.285714	0.3	0.555556	0.5	0	0.166667	0.555556
0.328045	0.405852	1	0.545455	0.5	0.285714	0.2	0.444444	0.5	0	0	0.444444
0.377171	0.151799	1	0.272727	0.333333	0.285714	0.2	0.444444	0.666667	0	0	0.444444
0.425828	0.476042	0.666667	0.454545	0.5	0.428571	0	0.222222	0.5	0.166667	0	0.222222
0.364658	0.330768	1	0.454545	0.5	0.285714	0.2	0.777778	0.5	0	0.166667	0.555556
0.358489	0.351157	1	0.454545	0.666667	0.285714	0.2	0.666667	0.5	0.166667	0	0.444444
0.292638	0.346009	1	0.454545	0.5	0.285714	0.2	0.444444	0.666667	0	0	0.555556
0.409627	0.371954	1	0.454545	0.5	0.285714	0.2	0.444444	0.5	0.166667	0	0.555556
0.374448	0.166225	0.666667	0.272727	0.333333	0.285714	0.2	0.444444	0.5	0.166667	0	0.555556
0.348497	0.129473	1	0.272727	0.333333	0.142857	0.2	0.444444	0.5	0	0	0.444444
0.391132	0.53614	1	0.545455	0.5	0.428571	0.2	0.444444	0.5	0	0	0.555556
0.426405	0.547405	1	0.545455	0.5	0.428571	0.2	0.444444	0.5	0.166667	0.166667	0.555556
0.452584	0.497808	1	0.545455	0.5	0.428571	0	0.333333	0.5	0	0	0.222222
0.404302	0.447752	0.666667	0.545455	0.5	0.428571	0.3	0.555556	0.5	0	1	0.555556
0.469294	0.340809	1	0.545455	0.5	0.285714	0.1	0.333333	0.5	0	0.5	0.444444
0.42914	0.328117	0.666667	0.545455	0.333333	0.285714	0.2	0.333333	0.5	0	0.5	0.444444
0.416158	0.170354	0.666667	0.272727	0.333333	0.285714	0.2	0.555556	0.666667	0	0.5	0.666667
0.33176	0.633143	1	0.545455	0.666667	0.428571	0.2	0.666667	0.666667	0	0.5	0.555556
0.462133	0.585992	0.666667	0.545455	0.5	0.428571	0.2	0.444444	0.666667	0	0.666667	0.666667
0.458163	0.580589	1	0.545455	0.666667	0.428571	0.2	0.333333	0.5	0	0.666667	0.666667
0.473009	0.62463	1	0.727273	0.666667	0.428571	0.1	0.222222	0.5	0	0.833333	0.666667
0.409654	0.48797	0.666667	0.545455	0.5	0.428571	0	0.222222	0.5	0	0.333333	0.333333
0.394311	0.486186	1	0.636364	0.5	0.428571	0	0.222222	0.5	0	0.333333	0.444444
0.370036	0.377918	1	0.545455	0.666667	0.428571	0	0.222222	0.5	0.5	0.5	0.555556
0.35476	0.365787	1	0.454545	0.666667	0.428571	0	0.222222	0.666667	0	0.333333	0.444444
0.376487	0.158732	1	0.363636	0.5	0.285714	0	0.222222	0.5	0	0.333333	0.444444
0.424889	0.377256	0.666667	0.454545	0.5	0.285714	0	0.222222	0.5	0	0.833333	0.444444
0.423038	0.416505	1	0.545455	0.5	0.428571	0.1	0.222222	0.5	0	1	0.444444
0.389201	0.451218	0.666667	0.454545	0.5	0.428571	0.2	0.444444	0.5	0	0.5	0.555556
0.401043	0.409267	0.666667	0.636364	0.5	0.428571	0.2	0.222222	0.5	0	0.5	0.555556
0.4359	0.494699	0.666667	0.545455	0.5	0.428571	0.2	0.222222	0.5	0	0.833333	0.444444
0.460027	0.524161	1	0.636364	0.666667	0.428571	0.1	0.222222	0.666667	0	0.833333	0.555556
0.489653	0.600163	1	0.454545	0.666667	0.428571	0.1	0.222222	0.5	0	0.333333	0.666667
0.40095	0.556275	0.666667	0.545455	0.5	0.428571	0.1	0.222222	0.5	0	0	0.444444
0.51661	0.603782	1	0.454545	0.5	0.428571	0.1	0.222222	0.5	0	0.166667	0.444444
0.49082	0.568356	0.666667	0.545455	0.5	0.428571	0.1	0.333333	0.5	0	0.333333	0.444444
0.495393	0.572943	1	0.363636	0.5	0.428571	0.1	0.222222	0.333333	0	0.666667	0.555556
0.641525	0.535682	1	0.545455	0.5	0.428571	0.2	0.333333	0.333333	0	0.5	0.444444
0.494562	0.590529	1	0.454545	0.5	0.428571	0.1	0.333333	0.5	0	0.666667	0.555556
0.459504	0.624223	0.666667	0.363636	0.5	0.428571	0.1	0.222222	0.333333	0	0.5	0.777778
0.49774	0.559333	1	0.545455	0.666667	0.428571	0.2	0.333333	0.666667	0	0.666667	0.555556
0.448373	0.570751	1	0.454545	0.666667	0.428571	0.1	0.333333	0.5	0	0.5	0.555556
0.396336	0.541951	1	0.545455	0.5	0.428571	0.1	0.333333	0.5	0	0	0.555556
0.364551	0.599093	1	0.363636	0.5	0.428571	0.2	0.333333	0.333333	0	0.333333	0.444444
0.420034	0.555663	1	0.454545	0.666667	0.428571	0.2	0.333333	0.5	0	0.166667	0.666667
0.38723	0.546182	1	0.454545	0.5	0.428571	0.1	0.222222	0.5	0	0.666667	0.666667
0.412296	0.543124	1	0.545455	0.666667	0.428571	0.2	0.444444	0.5	0	0.5	0.555556
0.348055	0.5759	1	0.545455	0.666667	0.428571	0.1	0.333333	0.666667	0.666667	0.5	0.666667
0.306197	0.291926	1	0.454545	0.333333	0.285714	0.2	0.333333	0.333333	0.5	0.333333	0.555556
0.301289	0.605311	1	0.636364	0.833333	0.428571	0.3	0.333333	0.5	0.333333	1	0.777778
0.402358	0.509736	0.666667	0.545455	0.5	0.428571	0.2	0.333333	0.5	0	0.5	0.666667
0.495796	0.528188	1	0.545455	0.5	0.428571	0.1	0.222222	0.5	0	0.666667	0.777778
0.358998	0.49893	1	0.545455	0.5	0.428571	0.5	0.333333	0.5	0.333333	0.833333	0.777778
0.348403	0.442043	1	0.545455	0.5	0.428571	0.2	0.222222	0.5	0	0.333333	0.666667
0.369138	0.573504	0.666667	0.545455	0.666667	0.571429	0.1	0.333333	0.5	0	0.333333	0.666667
0.417459	0.541085	1	0.636364	0.5	0.428571	0.1	0.333333	0.5	0	0.333333	0.777778
0.396618	0.511316	1	0.636364	0.5	0.428571	0.2	0.555556	0.5	0	0.5	0.666667
0.30385	0.570904	0.666667	0.545455	0.5	0.428571	0.2	0.222222	0.5	0.5	0.333333	0.666667
0.362754	0.517484	1	0.545455	0.5	0.428571	0.1	0.444444	0.5	0	0.333333	0.666667
0.362995	0.490723	0.666667	0.545455	0.5	0.428571	0.2	0.222222	0.5	0	0.333333	0.444444
0.319663	0.524518	1	0.545455	0.666667	0.428571	0.1	0.333333	0.666667	0	0.333333	0.666667
0.376567	0.49164	1	0.545455	0.5	0.428571	0.3	0.777778	0.5	0	0.166667	0.666667
0.358677	0.469161	1	0.545455	0.5	0.428571	0.1	0.222222	0.666667	0	0.5	0.666667
0.331746	0.537313	1	0.545455	0.666667	0.428571	0.1	0.222222	0.5	0.333333	0.5	0.666667
0.357537	0.548731	1	0.545455	0.666667	0.428571	0.2	0.222222	0.666667	0.166667	0.166667	0.444444
0.388504	0.356407	1	0.545455	0.666667	0.428571	0	0.111111	0.666667	0	0	0.222222
0.364256	0.316546	1	0.545455	0.5	0.142857	0.1	0.333333	0.666667	0	0.333333	0.555556
0.311978	0.310123	0.666667	0.454545	0.5	0.428571	0	0.222222	0.5	0	0.333333	0.444444
0.410525	0.467326	1	0.545455	0.5	0.428571	0.1	0.333333	0.666667	0	0.333333	0.666667
0.406032	0.414059	0.666667	0.545455	0.5	0.428571	0	0.222222	0.5	0	0.333333	0.333333
0.457144	0.495056	0.666667	0.545455	0.666667	0.428571	0.2	0.444444	0.666667	0	0.5	0.555556
0.434183	0.481038	1	0.636364	0.5	0.285714	0	0.222222	0.666667	0	0.5	0.222222
0.466558	0.453206	0.666667	0.545455	0.5	0.428571	0.3	0.444444	0.5	0	0.166667	0.666667
0.45941	0.178917	1	0.272727	0.333333	0.285714	0.2	0.444444	0.5	0	0.833333	0.666667
0.434653	0.328219	1	0.545455	0.5	0.285714	0	0.222222	0.5	0	0.333333	0.222222
0.393238	0.452085	1	0.545455	0.5	0.428571	0	0.222222	0.5	0	0.333333	0.222222
0.402371	0.470129	1	0.545455	0.5	0.428571	0.1	0.333333	0.5	0	0.5	0.555556
0.388517	0.478795	0.666667	0.545455	0.5	0.428571	0.1	0.333333	0.5	0	0.5	0.444444
0.468852	0.430472	1	0.545455	0.5	0.428571	0.2	0.444444	0.5	0	0.166667	0.333333
0.443746	0.477979	0.666667	0.545455	0.5	0.428571	0.2	0.333333	0.5	0	0.333333	0.444444
0.372544	0.280915	1	0.454545	0.5	0.285714	0	0.222222	0.5	0	0.5	0.333333
0.437013	0.488123	1	0.454545	0.5	0.428571	0.2	0.555556	0.333333	0	0.833333	0.666667
0.373201	0.510195	1	0.545455	0.5	0.428571	0.2	0.444444	0.5	0	0.166667	0.666667
0.417151	0.484555	1	0.545455	0.5	0.571429	0.1	0.222222	0.5	0	0.333333	0.444444
0.457854	0.563921	1	0.545455	0.5	0.428571	0.2	0.222222	0.5	0.166667	0.5	0.666667
0.41868	0.531858	1	0.636364	0.5	0.428571	0.2	0.555556	0.5	0	0.5	0.666667
0.370827	0.569783	0.666667	0.636364	0.666667	0.428571	0.1	0.222222	0.5	0.5	0.5	0.555556
0.34717	0.545417	1	0.545455	0.666667	0.428571	0.2	0.444444	0.5	0	0.5	0.555556
0.381731	0.514426	1	0.545455	0.5	0.428571	0.2	0.444444	0.5	0	0.333333	0.666667
0.428336	0.525385	1	0.545455	0.5	0.428571	0	0.444444	0.5	0	0.166667	0.333333
0.433915	0.443266	1	0.545455	0.5	0.428571	0	0.333333	0.333333	0	0.333333	0.222222
0.454716	0.526149	1	0.454545	0.5	0.428571	0.1	0.333333	0.5	0	0.333333	0.444444
0.386988	0.479814	1	0.454545	0.5	0.428571	0	0.222222	0.5	0	0.166667	0.333333
0.429194	0.443062	1	0.454545	0.5	0.428571	0	0.222222	0.333333	0	0	0.222222
0.372383	0.517331	1	0.454545	0.5	0.428571	0	0.222222	0.5	0.666667	0.166667	0.222222
0.413154	0.581099	1	0.636364	0.5	0.428571	0.2	0.444444	0.666667	0.666667	0.5	0.666667
0.450545	0.541187	0.666667	0.454545	0.5	0.428571	0	0.222222	0.5	0	0.333333	0.222222
0.428416	0.243909	1	0.454545	0.333333	0.285714	0	0.222222	0.5	0	0	0.333333
0.407172	0.509838	0.666667	0.363636	0.5	0.428571	0.1	0.333333	0.333333	0	0	0.555556
0.435457	0.468091	1	0.545455	0.5	0.428571	0.1	0.333333	0.5	0	0	0.444444
0.437241	0.479814	1	0.545455	0.5	0.428571	0.1	0.444444	0.5	0	0.5	0.777778
0.45245	0.163574	0.666667	0.272727	0.5	0.428571	0.1	0.222222	0.5	0	0.333333	0.555556
0.453804	0.469671	0.666667	0.636364	0.5	0.428571	0	0.222222	0.333333	0	0.166667	0.333333
0.401754	0.534152	1	0.545455	0.5	0.428571	0.2	0.222222	0.5	0	0.166667	0.777778
0.440929	0.572739	0.666667	0.454545	0.5	0.428571	0.1	0.333333	0.5	0	0.5	0.666667
0.446079	0.523244	1	0.909091	0.5	0.428571	0.1	0.333333	0.666667	0	0.333333	0.666667
0.438046	0.307728	0.666667	0.454545	0.333333	0.285714	0.1	0.333333	0.5	0	0.333333	0.666667
0.385097	0.132837	0.666667	0.272727	0.5	0.285714	0.1	0.333333	0.5	0	0.166667	0.666667
0.330633	0.139872	0.666667	0.272727	0.5	0.285714	0.1	0.333333	0.5	0	0.333333	0.666667
0.402358	0.394077	1	0.545455	0.5	0.285714	0.3	0.555556	0.5	0.333333	0.166667	0.666667
0.490216	0.412478	1	0.545455	0.5	0.285714	0.1	0.444444	0.5	0	0.833333	0.666667
0.486984	0.550515	0.666667	0.636364	0.5	0.428571	0.1	0.444444	0.5	0	0.833333	0.666667
0.44337	0.556836	0.666667	0.545455	0.5	0.428571	0.2	0.222222	0.5	0	0.333333	0.777778
0.518675	0.583546	0.666667	0.545455	0.5	0.428571	0.2	0.444444	0.5	0	0.833333	0.666667
0.494132	0.480222	0.666667	0.545455	0.5	0.428571	0.1	0.333333	0.5	0	0.333333	0.666667
0.473237	0.484096	1	0.545455	0.5	0.571429	0	0.222222	0.5	0	0.166667	0.333333
0.387887	0.551789	0.666667	0.454545	0.5	0.428571	0.2	0.444444	0.5	0.666667	0.166667	0.555556
0.389121	0.470588	1	0.636364	0.5	0.428571	0	0.222222	0.5	0	0.333333	0.444444
0.439293	0.546335	1	0.363636	0.5	0.428571	0.1	0.222222	0.5	0.5	0	0.444444
0.414079	0.607758	1	0.545455	0.5	0.428571	0.2	0.555556	0.5	0.5	0.833333	0.777778
0.398938	0.407381	0.666667	0.363636	0.5	0.428571	0	0.222222	0.333333	0	0.166667	0.444444
0.354519	0.454277	1	0.636364	0.5	0.428571	0.1	0.333333	0.666667	0	0.333333	0.666667
0.397704	0.464624	1	0.454545	0.5	0.428571	0.2	0.333333	0.5	0	0.333333	0.444444
0.451685	0.497961	0.666667	0.545455	0.5	0.428571	0.2	0.555556	0.5	0	0.5	0.666667
0.323297	0.457437	1	0.545455	0.5	0.428571	0	0.222222	0.5	0	0.166667	0.222222
0.348028	0.474462	1	0.545455	0.5	0.428571	0	0.222222	0.5	0	0.333333	0.444444
0.341215	0.455959	1	0.454545	0.5	0.428571	0	0.222222	0.333333	0	0.333333	0.444444
0.358931	0.164033	1	0.363636	0.5	0.285714	0.1	0.333333	0.5	0	0.333333	0.444444
0.259713	0.467683	1	0.545455	0.5	0.428571	0	0.222222	0.5	0	0.166667	0.333333
0.323927	0.443317	1	0.454545	0.5	0.428571	0	0.222222	0.5	0	0.333333	0.333333
0.32492	0.298297	1	0.454545	0.5	0.285714	0	0.222222	0.333333	0	0	0.333333
0.381865	0.470333	1	0.454545	0.5	0.428571	0.1	0.333333	0.5	0	0	0.666667
0.309202	0.501121	0.666667	0.454545	0.5	0.428571	0.2	0.333333	0.5	0.166667	0.166667	0.666667
0.360541	0.438628	1	0.636364	0.5	0.428571	0	0.222222	0.5	0	0.166667	0.444444
0.36793	0.459782	1	0.454545	0.5	0.428571	0.2	0.333333	0.5	0	0.333333	0.666667
0.334764	0.509328	1	0.454545	0.5	0.428571	0.3	0.333333	0.5	0.333333	1	0.777778
0.430629	0.483587	0.666667	0.545455	0.5	0.428571	0.3	0.444444	0.5	0.666667	0.166667	0.777778
0.407924	0.552758	1	0.545455	0.5	0.428571	0.3	0.444444	0.5	0.5	0.666667	1
0.365503	0.482567	1	0.545455	0.5	0.428571	0.3	0.333333	0.5	0.5	0.333333	0.777778
0.358784	0.539912	0.666667	0.454545	0.5	0.428571	0.3	0.333333	0.5	0.333333	0.333333	0.777778
0.319797	0.534203	0.666667	0.545455	0.5	0.428571	0	0.222222	0.5	0	0.5	0.444444
0.39195	0.56861	0.666667	0.545455	0.5	0.428571	0	0.222222	0.5	0.333333	0.333333	0.444444
0.364524	0.546896	1	0.545455	0.5	0.428571	0.1	0.333333	0.5	0	0.833333	0.666667
0.371189	0.536803	1	0.545455	0.666667	0.428571	0.1	0.222222	0.5	0	0.333333	0.555556
0.342475	0.609593	1	0.727273	0.5	0.428571	0.3	0.555556	0.666667	0.5	0.5	0.666667
0.465955	0.665256	0.666667	0.636364	0.5	0.428571	0.4	0.333333	0.666667	0.666667	0.5	0.777778
0.358717	0.512081	0.666667	0.545455	0.5	0.428571	0	0.222222	0.5	0	0.333333	0.444444
0.392822	0.519115	1	0.545455	0.5	0.428571	0	0.222222	0.5	0	0.333333	0.444444
0.448735	0.574727	1	0.545455	0.5	0.571429	0.3	0.333333	0.5	0.333333	0.333333	0.666667
0.401955	0.61311	1	0.545455	0.5	0.428571	0.2	0.444444	0.5	0.5	0.666667	0.666667
0.337406	0.475737	1	0.545455	0.5	0.428571	0	0.222222	0.5	0	0	0.444444
0.371511	0.491334	0.666667	0.545455	0.5	0.428571	0	0.222222	0.5	0	0.333333	0.333333
0.344662	0.558925	1	0.363636	0.5	0.571429	0	0.222222	0.5	0	0.166667	0.444444
0.403645	0.524111	1	0.545455	0.5	0.428571	0	0.222222	0.5	0	0.166667	0.333333
0.304226	0.511316	1	0.545455	0.5	0.428571	0.1	0.444444	0.5	0.5	0.5	0.666667
0.379089	0.461413	0.666667	0.545455	0.5	0.428571	0	0.222222	0.5	0	0.333333	0.333333
0.33644	0.471149	0.666667	0.636364	0.5	0.428571	0	0.222222	0.5	0	0.166667	0.444444
0.423776	0.4581	0.666667	0.545455	0.666667	0.428571	0.1	0.333333	0.5	0	0.166667	0.777778
0.407079	0.426751	0.666667	0.545455	0.5	0.428571	0	0.222222	0.5	0	0.5	0.444444
0.445181	0.527271	1	0.636364	0.5	0.428571	0	0.333333	0.5	0	0.333333	0.444444
0.41133	0.453002	1	0.545455	0.666667	0.428571	0	0.222222	0.5	0	0.166667	0.333333
0.383059	0.544296	1	0.545455	0.5	0.428571	0.2	0.444444	0.666667	0.666667	0.333333	0.555556
0.346338	0.525436	0.666667	0.636364	0.5	0.428571	0.3	0.444444	0.666667	0.166667	0.5	0.666667
0.374127	0.528137	0.666667	0.636364	0.666667	0.428571	0.1	0.333333	0.5	0	0.166667	0.777778
0.432078	0.480579	1	0.545455	0.666667	0.428571	0	0.222222	0.5	0	0.333333	0.333333
0.44388	0.545468	0.666667	0.545455	0.666667	0.714286	0.1	0.444444	0.166667	0	1	0.777778
0.356115	0.649149	1	0.545455	0.666667	0.571429	0.6	0.333333	0.666667	0.666667	1	0.777778
0.361252	0.565858	1	0.454545	0.5	0.428571	0.2	0.555556	0.5	0.666667	1	0.666667
0.317557	0.57223	0.666667	0.545455	0.5	0.428571	0.1	0.333333	0.5	0	0.333333	0.666667
0.423655	0.485982	1	0.545455	0.5	0.428571	0	0.222222	0.5	0	0.166667	0.444444
0.370438	0.17642	0.666667	0.272727	0.333333	0.285714	0.2	0.333333	0.5	0	0.5	0.666667
0.448922	0.171169	0.666667	0.363636	0.5	0.142857	0.2	0.444444	0.333333	0	0.5	0.444444
0.321929	0.163829	1	0.363636	0.333333	0.142857	0.2	0.444444	0.333333	0	0.5	0.666667
0.352829	0.167499	1	0.454545	0.5	0.285714	0	0.222222	0.5	0	0.333333	0.222222
0.224897	0.541696	0.666667	0.545455	0.5	0.428571	0.1	0.444444	0.5	0	0.5	0.555556
0.257795	0.528137	1	0.636364	0.5	0.428571	0.2	0.444444	0.5	0	0.333333	0.555556
0.276558	0.560455	1	0.636364	0.833333	0.428571	0.1	0.444444	0.5	0	0.833333	0.666667
0.245832	0.45759	1	0.636364	0.5	0.428571	0.2	0.222222	0.5	0	0.166667	0.444444
0.341282	0.511928	1	0.545455	0.5	0.428571	0.2	0.222222	0.5	0	0.333333	0.555556
0.246597	0.475686	1	0.545455	0.5	0.428571	0.1	0.222222	0.333333	0	0.333333	0.555556
0.287891	0.527271	1	0.545455	0.5	0.428571	0.2	0.444444	0.5	0	0.333333	0.666667
0.33408	0.508513	1	0.454545	0.5	0.428571	0.2	0.222222	0.5	0	0	0.555556
0.42851	0.553064	1	0.454545	0.5	0.428571	0.2	0.444444	0.333333	0	0.333333	0.555556
0.299143	0.446784	1	0.454545	0.5	0.428571	0.3	0.222222	0.333333	0	0	0.444444
0.343817	0.412172	1	0.454545	0.5	0.428571	0	0.222222	0.333333	0	0	0.444444
0.289661	0.475227	1	0.454545	0.5	0.428571	0.2	0.222222	0.333333	0	0.833333	0.666667
0.441171	0.443012	1	0.636364	0.5	0.428571	0.2	0.444444	0.333333	0	0	0.444444
0.458176	0.481853	0.666667	0.545455	0.5	0.428571	0	0.222222	0.5	0.666667	0.166667	0.333333
0.371511	0.442196	1	0.363636	0.5	0.428571	0	0.222222	0.333333	0	0	0.333333
0.415716	0.497604	0.666667	0.454545	0.5	0.428571	0.1	0.333333	0.333333	0	0.333333	0.666667
0.405094	0.462178	1	0.545455	0.5	0.428571	0.2	0.444444	0.5	0	0.333333	0.666667
0.270255	0.421552	0.666667	0.636364	0.5	0.285714	0.1	0.222222	0.5	0	0.166667	0.444444
0.266513	0.476603	1	0.454545	0.5	0.428571	0.2	0.333333	0.333333	0	0.5	0.666667
0.317839	0.487817	1	0.454545	0.5	0.428571	0	0.222222	0.5	0	0.166667	0.444444
0.394606	0.524009	1	0.545455	0.5	0.428571	0.2	0.222222	0.333333	0	0.333333	0.555556
0.383126	0.476603	1	0.545455	0.5	0.428571	0.1	0.333333	0.5	0	0.166667	0.444444
0.298499	0.523295	1	0.454545	0.5	0.428571	0.2	0.222222	0.333333	0	0.333333	0.444444
0.401915	0.484861	1	0.545455	0.5	0.428571	0.1	0.333333	0.333333	0	0.333333	0.555556
0.403431	0.54343	1	0.454545	0.5	0.428571	0.2	0.333333	0.5	0	0.5	0.666667
0.339377	0.512183	1	0.454545	0.666667	0.428571	0	0.222222	0.5	0	0.333333	0.222222
0.491638	0.506678	0.666667	0.818182	0.5	0.428571	0.1	0.333333	0.5	0	0.5	0.666667
0.321178	0.501427	1	0.454545	0.5	0.428571	0.1	0.222222	0.5	0	0.5	0.666667
0.226694	0.458558	1	0.545455	0.5	0.428571	0	0.222222	0.5	0	0	0.444444
0.244371	0.502345	1	0.454545	0.5	0.428571	0	0.222222	0.333333	0	0.333333	0.444444
0.208052	0.351667	1	0.545455	0.5	0.428571	0	0.222222	0.5	0	0.5	0.444444
0.194574	0.464166	0.666667	0.545455	0.5	0.428571	0	0.222222	0.333333	0	0.5	0.333333
0.164505	0.496687	0.666667	0.545455	0.5	0.428571	0	0.222222	0.5	0	0.5	0.444444
0.219425	0.518096	1	0.545455	0.5	0.428571	0.1	0.222222	0.5	0	0.5	0.666667
0.146158	0.492048	1	0.636364	0.5	0.428571	0.1	0.222222	0.5	0	0.333333	0.666667
0.181846	0.503823	1	0.545455	0.5	0.428571	0	0.222222	0.5	0	0.333333	0.444444
0.280045	0.370272	1	0.454545	0.5	0.428571	0.1	0.333333	0.333333	0	0.666667	0.666667
0.232166	0.359517	1	0.545455	0.5	0.285714	0.2	0.444444	0.5	0	0.666667	0.666667
0.255663	0.575849	1	0.545455	0.666667	0.428571	0.1	0.222222	0.5	0	0.5	0.666667
0.382173	0.545468	1	0.545455	0.5	0.285714	0.2	0.444444	0.666667	0	0.666667	0.666667
0.246624	0.559639	1	0.545455	0.5	0.428571	0.1	0.333333	0.5	0	0.5	0.666667
0.259593	0.556275	1	0.636364	0.5	0.428571	0.1	0.222222	0.5	0.166667	0.5	0.555556
0.176951	0.551534	0.666667	0.545455	0.5	0.428571	0.1	0.222222	0.5	0.5	0.666667	0.666667
0.157558	0.533948	1	0.545455	0.666667	0.428571	0	0.222222	0.5	0	0.333333	0.333333
0.243405	0.529769	1	0.545455	0.5	0.428571	0.2	0.444444	0.5	0	0.333333	0.444444
0.096536	0.571006	1	0.636364	0.5	0.428571	0.1	0.555556	0.5	0.5	0.833333	0.666667
0.123305	0.53247	1	0.545455	0.5	0.428571	0.2	0.222222	0.5	0.166667	0.166667	0.666667
0.278798	0.494189	1	0.545455	0.5	0.428571	0.2	0.444444	0.5	0	0.166667	0.555556
0.250795	0.484045	0.666667	0.636364	0.5	0.428571	0.3	0.555556	0.5	0	0.833333	0.666667
0.211392	0.437812	0.666667	0.636364	0.5	0.428571	0.2	0.222222	0.5	0	0.333333	0.555556
0.210185	0.460546	0.666667	0.636364	0.5	0.428571	0	0.222222	0.5	0.333333	0.333333	0.333333
0.140633	0.510806	1	0.545455	0.5	0.428571	0.1	0.222222	0.5	0.5	0.166667	0.333333
0.182544	0.349373	1	0.545455	0.5	0.428571	0	0.222222	0.5	0	0.333333	0.222222
0.193809	0.438169	0.666667	0.545455	0.5	0.428571	0.1	0.333333	0.5	0.333333	0.333333	0.555556
0.259767	0.428943	0.666667	0.545455	0.5	0.428571	0.2	0.222222	0.5	0	0.166667	0.555556
0.253101	0.453512	0.666667	0.545455	0.5	0.428571	0.2	0.555556	0.5	0.166667	0.833333	0.666667
0.216273	0.308033	1	0.454545	0.333333	0.285714	0	0.222222	0.333333	0	0.333333	0.555556
0.156096	0.446478	0.666667	0.454545	0.5	0.428571	0.2	0.222222	0.333333	0	0.166667	0.444444
0.266003	0.36961	0.666667	0.545455	0.5	0.428571	0.2	0.333333	0.333333	0	0.333333	0.333333
0.225232	0.45708	1	0.636364	0.5	0.428571	0.2	0.333333	0.5	0	0.333333	0.666667
0.311897	0.519472	1	0.363636	0.5	0.428571	0.2	0.222222	0.333333	0	0.333333	0.444444
0.17628	0.469059	0.666667	0.454545	0.5	0.428571	0.2	0.222222	0.333333	0	0.166667	0.444444
0.176897	0.50576	1	0.454545	0.5	0.285714	0	0.222222	0.333333	0	0.333333	0.333333
0.242627	0.517382	1	0.545455	0.5	0.285714	0.1	0.333333	0.5	0	0.333333	0.444444
0.237718	0.558416	0.666667	0.545455	0.5	0.285714	0.1	0.222222	0.5	0	0.166667	0.333333
0.206175	0.486747	1	0.636364	0.5	0.285714	0.2	0.222222	0.333333	0	0.166667	0.555556
0.228894	0.516159	0.666667	0.545455	0.5	0.285714	0.2	0.333333	0.5	0	0.333333	0.333333
0.223274	0.461515	0.666667	0.636364	0.5	0.428571	0.2	0.555556	0.5	0	0.166667	0.333333
0.208937	0.603986	1	0.636364	0.5	0.428571	0.2	0.333333	0.5	0.5	0.333333	0.444444
0.178319	0.498522	1	0.454545	0.5	0.285714	0.1	0.222222	0.333333	0.166667	0.333333	0.444444
0.190617	0.516159	0.666667	0.454545	0.5	0.285714	0.2	0.333333	0.5	0	0.333333	0.555556
0.253155	0.597716	0.666667	0.454545	0.333333	0.285714	0.1	0.333333	0.333333	0.666667	0.5	0.444444
0.282808	0.54032	1	0.454545	0.5	0.285714	0.1	0.333333	0.333333	0	0.333333	0.444444
0.203492	0.525895	1	0.545455	0.5	0.285714	0.1	0.222222	0.5	0	0.5	0.444444
0.248314	0.49215	1	0.545455	0.5	0.428571	0.2	0.333333	0.5	0	0.333333	0.444444
0.205853	0.507901	1	0.636364	0.5	0.571429	0.2	0.333333	0.5	0	0.333333	0.444444
0.175422	0.55077	1	0.636364	0.5	0.428571	0.1	0.222222	0.5	0.166667	0.333333	0.444444
0.200944	0.303548	0.666667	0.363636	0.5	0.428571	0.1	0.222222	0.5	0	0.166667	0.444444
0.265078	0.455143	0.666667	0.363636	0.5	0.428571	0.2	0.222222	0.333333	0	0.333333	0.444444
0.27118	0.474258	0.666667	0.454545	0.5	0.428571	0.1	0.222222	0.333333	0	0.333333	0.333333
0.214235	0.4555	1	0.545455	0.5	0.428571	0.2	0.222222	0.5	0	0	0.444444
0.130748	0.466001	1	0.454545	0.5	0.428571	0	0.222222	0.5	0	0.166667	0.333333
0.157585	0.48272	1	0.545455	0.5	0.428571	0.1	0.222222	0.5	0	0.5	0.666667
0.153602	0.484861	0.666667	0.454545	0.5	0.428571	0.1	0.222222	0.5	0	0.166667	0.444444
0.14876	0.482159	0.666667	0.454545	0.5	0.428571	0	0.222222	0.333333	0	0.333333	0.444444
0.128308	0.511877	1	0.454545	0.5	0.428571	0	0.444444	0.333333	0.5	0.833333	0.555556
0.160026	0.399021	1	0.363636	0.333333	0.428571	0	0.222222	0.333333	0	0.166667	0.444444
0.102008	0.4136	1	0.545455	0.5	0.428571	0	0.222222	0.333333	0	0.166667	0.222222
0.153468	0.415996	1	0.454545	0.5	0.428571	0	0.222222	0.333333	0	0	0.222222
0.138889	0.147874	0.666667	0.181818	0.333333	0.285714	0.2	0.444444	0.333333	0	0.5	0.666667
0.187332	0.471302	1	0.454545	0.333333	0.571429	0.1	0.333333	0.5	0.5	0.5	0.666667
0.211351	0.283005	1	0.454545	0.5	0.285714	0.2	0.333333	0.5	0	0.5	0.666667
0.167228	0.438118	1	0.454545	0.5	0.428571	0	0.222222	0.333333	0	0.333333	0.333333
0.165122	0.155062	1	0.272727	0.5	0.285714	0.2	0.444444	0.5	0	0.333333	0.444444
0.1385	0.264094	1	0.545455	0.5	0.285714	0.2	0.222222	0.5	0.166667	0.333333	0.444444
0.097045	0.304159	1	0.363636	0.333333	0.285714	0.2	0.444444	0.666667	0.5	0.333333	0.444444
0.23395	0.39321	0.666667	0.545455	0.5	0.428571	0.2	0.222222	0.333333	0	0	0.444444
0.162641	0.304516	1	0.545455	0.5	0.428571	0	0.222222	0.5	0	0.166667	0.333333
0.133619	0.242838	1	0.454545	0.333333	0.285714	0.1	0.222222	0.5	0	0.333333	0.444444
0.168046	0.256244	1	0.363636	0.5	0.285714	0.2	0.333333	0.5	0	0.166667	0.555556
0.206993	0.179937	1	0.272727	0.5	0.285714	0.2	0.555556	0.5	0	0.833333	0.666667
0.232287	0.414364	0.666667	0.454545	0.5	0.428571	0	0.222222	0.5	0	0.166667	0.222222
0.296876	0.226374	0.666667	0.454545	0.333333	0.142857	0	0.222222	0.333333	0	0.333333	0.222222
0.185172	0.510093	1	0.636364	0.5	0.428571	0.1	0.333333	0.333333	0	0.5	0.666667
0.291847	0.436334	1	0.545455	0.5	0.428571	0.2	0.333333	0.5	0	0.166667	0.444444
0.358154	0.482006	0.666667	0.545455	0.5	0.428571	0.1	0.333333	0.5	0	0.5	0.666667
0.357805	0.51101	1	0.636364	0.5	0.428571	0.2	0.222222	0.5	0.333333	0	0.444444
0.303663	0.456978	0.666667	0.636364	0.5	0.285714	0.2	0.333333	0.5	0	0.333333	0.333333
0.269517	0.508462	1	0.454545	0.5	0.428571	0.2	0.333333	0.5	0.333333	0.5	0.666667
0.26379	0.45081	0.666667	0.545455	0.5	0.428571	0.2	0.222222	0.5	0	0.333333	0.666667
0.18481	0.441992	1	0.363636	0.5	0.285714	0.1	0.222222	0.333333	0.5	0.166667	0.444444
0.215885	0.433428	0.666667	0.454545	0.5	0.428571	0	0.222222	0.333333	0	0.333333	0.222222
0.259029	0.466154	0.666667	0.636364	0.5	0.428571	0.1	0.444444	0.5	0	0.833333	0.666667
0.25062	0.435977	1	0.454545	0.5	0.428571	0	0.222222	0.666667	0.5	0.166667	0.222222
0.227177	0.143542	0.666667	0.272727	0.5	0.285714	0.1	0.222222	0.5	0	0.166667	0.666667
0.241232	0.137374	0.666667	0.272727	0.5	0.285714	0.2	0.444444	0.5	0	0.333333	0.333333
0.341765	0.36492	0.666667	0.454545	0.5	0.285714	0.2	0.666667	0.5	0	0.5	0.666667
0.322023	0.301305	1	0.363636	0.5	0.285714	0	0.222222	0.5	0	0.166667	0.222222
0.271904	0.151035	0.666667	0.181818	0.5	0.142857	0.1	0.555556	0.333333	0	0.833333	0.555556
0.301919	0.309818	0.666667	0.545455	0.5	0.285714	0.2	0.444444	0.5	0	0.5	0.666667
0.185494	0.459068	0.666667	0.545455	0.5	0.428571	0.2	0.333333	0.5	0	0.5	0.666667
0.253383	0.153431	0.666667	0.272727	0.5	0.285714	0.2	0.333333	0.5	0	0.166667	0.666667
[truncated: 17,502 more rows]
